# Supplementary material
Source: PubMed Central journal article supplement (PMC10258896)
Supplement: ml3c00004_si_001.pdf [file ml3c00004_si_001.pdf]

Supplementary Information

# **Design, synthesis and biological activity of thioguanine modified pleuromutilin derivatives**

*Can Yong<sup>a</sup>, Jianglin Yu<sup>a</sup>, Chunxia Wu<sup>a</sup>, Xiujuan Zhang<sup>b</sup>, Yun Li<sup>a</sup>, Chuan Xie<sup>a</sup>,*

*Xiaolong He<sup>b,c</sup>, Dongfang Liu<sup>a,c</sup>, Zhouyu Wang<sup>a,c</sup>, Peng Lai<sup>\*b</sup>, Yuanyuan Zhang<sup>\*a,c</sup>*

<sup>a</sup> Department of Chemistry, School of Science, Xihua University, Chengdu, 610039,  
China

<sup>b</sup> Department of Pharmaceutical Engineering, School of Food and Bioengineering,  
Xihua University, Chengdu, 610039, China

<sup>c</sup> Asymmetric Synthesis and Chiral Technology Key Laboratory of Sichuan Province,  
Chengdu, 610041, China

CONTACT: Peng Lai: lai211@sina.com

Yuanyuan Zhang: yuanyuan.zhang@mail.xhu.edu.cn

## **Table of Contents**

- 1. Synthetic experimental procedures**
- 2. Biology experimental methods**
- 3. Molecular docking**
- 4. References for supporting information**
- 5. HPLC,  $^1\text{H}$  NMR,  $^{13}\text{C}$  NMR and HRMS of intermediate compound 3 and 7**
- 6. HPLC,  $^1\text{H}$  NMR,  $^{13}\text{C}$  NMR, HRMS, IR of all final compounds**
- 7. The crystal data of compound 6b and 6i**

## 1. Synthetic experimental procedures

Analytical grade reagents were employed and provided by Energy Chemical (Shanghai, China) and Kelong Chemical (Chengdu, China). WRS-1B microscopic melting point meter (Shanghai Precision Scientific Instruments Co., Ltd.), Varian Unity INOVA-400MHz NMR (Varian Corporation, USA) and Agilent 6210 Time of Flight (TOF) liquid chromatograph (Agilent Technologies, USA) were used to analyze the structures. TLC was performed using silica gel plates (Yantai Silicone Development Co., Ltd.), and the analysis was conducted through absorption with a UV analyzer (Shanghai Anting Electronic Instrument Factory, Model ZF-2). The compounds were purified through column chromatography on silica gel (Grade H, Qingdao Ocean Chemical). Analytical HPLC analyses were performed on a Essentia LC-16 (Shimadzu, Japan). The columns were NanoChrom ChromCore C18 ( $5\ \mu\text{m}$ ,  $4.6 \times 250\ \text{mm}$ ), with a flowrate of  $1\ \text{mL}\cdot\text{min}^{-1}$ . For compounds **3**, **4a-4b**, **5a-5d** and **6a-6p** the eluent was a mixture of water and acetonitrile (water: acetonitrile= 3:7). For compounds **7** and **8a-8g** the eluent was a mixture of 0.1% TEA in water and acetonitrile (water: acetonitrile= 3:7). The columns were thermostated at  $30\ ^\circ\text{C}$ . All compounds are  $>95\%$  pure by HPLC analysis.

### 1.1 Synthesis of compounds **3**

Triethylamine (151 mg, 1.50 mmol) was added to a solution of 6-thioguanine (284 mg, 1.86 mmol) in dried DMF (5 mL), which was stirred at  $80\ ^\circ\text{C}$  for 30 min. Subsequently, compounds **2**<sup>[1]</sup> (1.0 g, 1.86 mmol) were added to the reaction solution.

The mixture was refluxed for 2 h, diluted by water, and then extracted with EtOAc (20 mL×3). The combined organic layer was washed with brine and then dried over anhydrous Na<sub>2</sub>SO<sub>4</sub>. Solvent evaporation was completed before the crude product was purified through silica gel column chromatography to prepare compound **3**.

White powder; yield: 85.5%; mp: 168.4-170.0 °C; <sup>1</sup>H NMR (400 MHz, CDCl<sub>3</sub>): δ (ppm) 10.35 (s, 1H), 7.78 (s, 1H), 6.52 (dd, *J* = 17.2, 11.2 Hz, 1H), 5.76 (d, *J* = 8.4 Hz, 1H), 5.33 (d, *J* = 11.2 Hz, 1H), 5.19 (d, *J* = 17.2 Hz, 1H), 4.88 (s, 2H), 3.98 (ABq, *J* = 16.4 Hz, 2H), 3.33 (dd, *J* = 9.6, 6.8 Hz, 1H), 2.37 - 2.04 (m, 4H), 1.99 (dd, *J* = 16.0, 8.4 Hz, 1H), 1.77 (s, 1H), 1.66 - 1.57 (m, 2H), 1.53 - 1.45 (m, 2H), 1.45 - 1.40 (m, 4H), 1.36 - 1.27 (m, 2H), 1.14 (s, 3H), 1.08 (s, 1H), 0.85 (d, *J* = 6.8 Hz, 3H), 0.76 (d, *J* = 6.8 Hz, 3H). ; <sup>13</sup>C NMR (101 MHz, DMSO-*d*<sub>6</sub>): δ (ppm) 217.6, 167.8, 159.8, 157.5, 152.5, 141.2, 139.6, 124.3, 115.8, 73.1, 70.4, 57.7, 45.4, 44.6, 43.9, 42.0, 36.9, 36.8, 34.5, 31.2, 30.6, 29.1, 27.1, 24.9, 16.6, 14.9, 12.0; HRMS: calculated for C<sub>27</sub>H<sub>37</sub>N<sub>5</sub>O<sub>4</sub>S ([M + H]<sup>+</sup>): 528.2639; found: 528.2638.

## 1.2 Synthesis of compounds **4a-4b**

Methyl chloroformate or ethyl chloroformate (0.21 mmol) was added to the solution of compound **3** (100 mg, 0.19 mmol) and pyridine (15 mg, 0.19 mmol) in dry DCM, the mixture was stirred at ambient temperature for 6 h. The reaction was monitored using TLC. After the reaction completed, the solvent was evaporated, and the residue was purified through silica gel column chromatography to produce the compounds **4a-4b**.

**4a:** White powder; yield: 51.4%; mp: 151.8-153.1 °C; <sup>1</sup>H NMR (400 MHz, DMSO-*d*<sub>6</sub>): δ (ppm) 8.30 (s, 1H), 6.77 (s, 2H), 6.09 (dd, *J* = 17.6, 11.2 Hz, 1H, H19), 5.53 (d, *J* = 8.4 Hz, 1H, H14), 5.05 (dd, *J* = 17.6, 1.6 Hz, 1H, H20), 4.98 (dd, *J* = 11.2, 1.6 Hz, 1H, H20), 4.49 (d, *J* = 6.0 Hz, 1H), 4.17 (ABq, *J* = 16.4 Hz, 2H, H22), 3.98 (s, 3H), 3.40 (t, *J* = 6.0 Hz, 1H, H11), 2.37 (s, 1H, H4), 2.23 – 1.96 (m, 4H, H10, H2, H13), 1.69 – 1.34 (m, 4H, H7, H1), 1.34 – 1.28 (m, 4H, H18, H8), 1.27 – 1.19 (m, 2H, H13, H6), 1.04 (s, 3H, H15), 1.00 – 0.94 (m, 1H, H8), 0.80 (d, *J* = 6.8 Hz, 3H, H17), 0.60 (d, *J* = 6.8 Hz, 3H, H16); <sup>13</sup>C NMR (101 MHz, DMSO-*d*<sub>6</sub>): δ (ppm) 217.6(C3), 167.5(C21), 160.9, 159.3, 150.9, 148.8, 141.2, 139.3(C19), 124.4, 115.8(C20), 73.1(C11), 70.6(C14), 57.7(C4), 55.2, 45.4(C22), 44.6(C9), 43.9(C13), 41.9(C12), 36.9(C5), 36.8(C6), 34.5(C10), 31.1(C2), 30.6(C8), 29.1(C7), 27.1(C18), 24.9(C1), 16.6(C16), 14.9(C15), 11.9(C17); IR (KBr, cm<sup>-1</sup>): 3428, 2928, 1761, 1730, 1618, 1560, 1465, 1385, 1296, 1191, 1118, 1025, 995, 768; HRMS: calculated for C<sub>29</sub>H<sub>39</sub>N<sub>5</sub>O<sub>6</sub>S ([M + H]<sup>+</sup>): 586.2694; found: 586.2681.

**4b:** White powder; yield: 52.3%; mp: 156.8-159.1 °C; <sup>1</sup>H NMR (400 MHz, DMSO-*d*<sub>6</sub>): δ (ppm) 8.31 (s, 1H), 6.77 (s, 2H), 6.10 (dd, *J* = 17.6, 11.2 Hz, 1H, H19), 5.54 (d, *J* = 8.4 Hz, 1H, H14), 5.06 (dd, *J* = 17.6, 1.6 Hz, 1H, H20), 4.99 (dd, *J* = 11.2, 1.6 Hz, 1H, H20), 4.52 (d, *J* = 6.0 Hz, 1H), 4.44 (q, *J* = 7.2 Hz, 2H), 4.18 (ABq, *J* = 16.4 Hz, 2H, H22), 3.41 (dd, *J* = 7.2, 4.0 Hz, 1H, H11), 2.39 (s, 1H, H4), 2.24 – 2.00 (m, 4H, H10, H2, H13), 1.69 – 1.41 (m, 4H, H7, H1), 1.38 (t, *J* = 7.2 Hz, 3H), 1.34 – 1.29 (m, 4H, H18, H8), 1.28 – 1.22 (m, 2H, H13, H6), 1.05 (s, 3H, H15), 1.01 – 0.94 (m, 1H, H8), 0.81 (d, *J* = 6.8 Hz, 3H, H17), 0.61 (d, *J* = 6.8 Hz, 3H, H16); <sup>13</sup>C NMR

(101 MHz, DMSO-*d*<sub>6</sub>):  $\delta$  (ppm) 217.6(C3), 167.5(C21), 160.9, 159.3, 150.9, 147.9, 141.2, 139.3(C19), 124.4, 115.8(C20), 73.1(C11), 70.6(C14), 64.5, 60.2, 57.7(C4), 45.4(C22), 44.6(C9), 43.9(C13), 41.9(C12), 36.9(C5), 36.8(C6), 34.5(C10), 31.1(C2), 30.6(C8), 29.1(C7), 27.1(C18), 24.9(C1), 16.6(C16), 14.9(C15), 12.0(C17); IR (KBr, cm<sup>-1</sup>): 3444, 2931, 1731, 1621, 1567, 1506, 1470, 1376, 1324, 1295, 1117, 1015, 915, 768; HRMS: calculated for C<sub>30</sub>H<sub>41</sub>N<sub>5</sub>O<sub>6</sub>S ([M + H]<sup>+</sup>): 600.2850; found: 600.2848.

### 1.3 Synthesis of compounds 5a-5d

Substituted benzoic acid (0.82 mmol) was dissolved in 2 mL of SOCl<sub>2</sub> and then stirred at 60 °C for 2 h. The reaction was evaporated to prepare the crude product. The crude product, compound **3** (217 mg, 0.41 mmol) and pyridine (64 mg, 0.82 mmol) were added in dry DCM. The solution was stirred at ambient temperature for 2 h. Afterward, the reaction mixture was concentrated to obtain the crude intermediate, which was purified through silica gel column chromatography to compounds **5a-5d**.

**5a**: White powder; yield: 49.1%; mp: 121.6-122.3 °C; <sup>1</sup>H NMR (400 MHz, DMSO-*d*<sub>6</sub>):  $\delta$  (ppm) 8.25 (s, 1H), 7.85 (d, *J* = 8.8 Hz, 2H), 7.11 (d, *J* = 8.8 Hz, 2H), 6.60 (s, 2H), 6.10 (dd, *J* = 17.6, 11.2 Hz, 1H, H19), 5.54 (d, *J* = 8.4 Hz, 1H, H14), 5.06 (dd, *J* = 17.6, 1.6 Hz, 1H, H20), 4.99 (dd, *J* = 11.2, 1.6 Hz, 1H, H20), 4.50 (d, *J* = 6.0 Hz, 1H), 4.20 (ABq, *J* = 16.4 Hz, 2H, H22), 3.89 (s, 3H), 3.41 (t, *J* = 5.6 Hz, 1H, H11), 2.39 (s, 1H, H4), 2.23 – 1.98 (m, 4H, H10, H2, H13), 1.69 – 1.35 (m, 4H, H7, H1), 1.33 (d, *J* = 4.4 Hz, 3H, H18), 1.31 – 1.21 (m, 3H, H8, H13, H6), 1.04 (s, 3H, H15), 1.00 (d, *J* = 3.6 Hz, 1H, H8), 0.81 (d, *J* = 6.8 Hz, 3H, H17), 0.62 (d, *J* = 6.8 Hz, 3H, H16); <sup>13</sup>C

NMR (101 MHz, DMSO-*d*<sub>6</sub>):  $\delta$  (ppm) 217.6(C3), 167.6(C21), 165.5, 164.7, 160.5, 159.3, 151.6, 141.2(C19), 140.4, 133.9, 124.4, 124.0, 115.8(C20), 114.6, 73.1(C11), 70.6(C14), 57.7(C4), 56.3, 45.4(C22), 44.6(C9), 43.9(C13), 42.0(C12), 36.9(C5), 36.8(C6), 34.5(C10), 31.2(C2), 30.6(C8), 29.1(C7), 27.1(C18), 24.9(C1), 16.6(C16), 14.9(C15), 12.0(C17); IR (KBr, cm<sup>-1</sup>): 3431, 2931, 1724, 1606, 1560, 1459, 1355, 1292, 1261, 1171, 1021, 899, 763; HRMS: calculated for C<sub>35</sub>H<sub>43</sub>N<sub>5</sub>O<sub>6</sub>S ([M + H]<sup>+</sup>): 662.3007; found: 662.2997.

**5b**: White powder; yield: 45.3%; mp: 147.5-148.4°C; <sup>1</sup>H NMR (400 MHz, DMSO-*d*<sub>6</sub>):  $\delta$  (ppm) 8.35 (s, 1H), 8.08 (d, *J* = 8.4 Hz, 2H), 7.47 (d, *J* = 8.4 Hz, 2H), 6.90 (s, 2H), 6.05 (dd, *J* = 17.6, 11.2 Hz, 1H, H19), 5.48 (d, *J* = 8.4 Hz, 1H, H14), 5.00 (dd, *J* = 17.6, 1.6 Hz, 1H, H20), 4.91 (dd, *J* = 11.2, 1.6 Hz, 1H, H20), 4.49 (d, *J* = 6.0 Hz, 1H), 4.14 (ABq, *J* = 16.4 Hz, 2H, H22), 3.37 (t, *J* = 6.0 Hz, 1H, H11), 2.38 (s, 3H), 2.32 (s, 1H, H4), 2.23 – 1.99 (m, 3H, H10, H2), 1.93 (dd, *J* = 15.6, 8.4 Hz, 1H, H13), 1.61 (t, *J* = 12.0 Hz, 2H, H7), 1.45 – 1.24 (m, 4H, H1, H13, H8), 1.23 – 1.19 (m, 4H, H18, H6), 1.01 (s, 3H, H15), 0.97 (d, *J* = 4.0 Hz, 1H, H6), 0.79 (d, *J* = 6.8 Hz, 3H, H17), 0.51 (d, *J* = 6.8 Hz, 3H, H16); <sup>13</sup>C NMR (101 MHz, DMSO-*d*<sub>6</sub>):  $\delta$  (ppm) 217.5(C3), 167.3(C21), 160.6, 160.1, 150.4, 147.1, 141.1(C19), 137.7, 134.0, 130.7, 128.5, 123.9, 115.7(C20), 73.1(C11), 70.6(C14), 57.7(C4), 45.4(C22), 44.5(C9), 43.9(C13), 41.9(C12), 36.8(C5), 36.7(C6), 34.5(C10), 31.3(C2), 30.5(C8), 29.0(C7), 27.0(C18), 24.9(C1), 21.7, 16.5(C16), 14.8(C15), 11.9(C17); IR (KBr, cm<sup>-1</sup>): 3440, 2926, 1729, 1595, 1557, 1462, 1383, 1262, 1174, 1092, 912, 587; HRMS: calculated for C<sub>35</sub>H<sub>43</sub>N<sub>5</sub>O<sub>5</sub>S ([M + H]<sup>+</sup>): 646.3058; found: 646.3054.

**5c:** Light yellow foam; yield: 55.8%; mp: 155.1-156.3 °C; <sup>1</sup>H NMR (400 MHz, DMSO-*d*<sub>6</sub>): δ (ppm) 8.54 (s, 1H), 8.35 (d, *J* = 8.0 Hz, 1H), 7.98 (t, *J* = 7.2 Hz, 1H), 7.88 (dd, *J* = 18.8, 7.6 Hz, 2H), 6.40 (s, 2H), 6.08 (dd, *J* = 17.6, 11.2 Hz, 1H, H19), 5.52 (d, *J* = 8.0 Hz, 1H, H14), 5.04 (d, *J* = 17.6 Hz, 1H, H20), 4.96 (d, *J* = 11.2 Hz, 1H, H20), 4.50 (d, *J* = 5.6 Hz, 1H), 4.15 (ABq, *J* = 16.4 Hz, 2H, H22), 3.43 – 3.37 (m, 1H, H11), 2.36 (s, 1H, H4), 2.24 – 2.00 (m, 4H, H10, H2, H13), 1.68 – 1.56 (m, 2H, H7), 1.52 – 1.33 (m, 3H, H1, H8), 1.31 – 1.20 (s, 5H, H18, H13, H6), 1.03 (s, 3H, H15), 0.97 (d, *J* = 14.0 Hz, 1H, H8), 0.80 (d, *J* = 6.4 Hz, 3H, H17), 0.58 (d, *J* = 6.4 Hz, 3H, H16); <sup>13</sup>C NMR (101 MHz, DMSO-*d*<sub>6</sub>): δ (ppm) 217.6(C3), 167.4(C21), 163.8, 160.2, 159.7, 150.4, 145.9, 141.2(C19), 138.4, 135.7, 132.8, 130.1, 129.7, 125.0, 124.5, 115.8(C20), 73.1(C11), 70.6(C14), 57.7(C4), 45.4(C22), 44.6(C9), 43.9(C13), 42.0(C12), 36.9(C5), 36.8(C6), 34.5(C10), 31.2(C2), 30.6(C8), 29.1(C7), 27.0(C18), 24.9(C1), 21.2, 16.6(C16), 14.9(C15), 12.0(C17); IR (KBr, cm<sup>-1</sup>): 3416, 2929, 1729, 1602, 1560, 1532, 1463, 1287, 1244, 1138, 1018, 896, 711; HRMS: calculated for C<sub>34</sub>H<sub>40</sub>N<sub>6</sub>O<sub>7</sub>S ([M + H]<sup>+</sup>): 677.2752; found: 677.2756.

**5d:** Light pink powder; yield: 60.5%; mp: 165.5-166.7 °C; <sup>1</sup>H NMR (400 MHz, DMSO-*d*<sub>6</sub>): δ (ppm) 8.42 (s, 1H), 7.32 – 7.25 (m, 4H), 7.22 (d, *J* = 8.0 Hz, 1H), 6.74 (s, 2H), 6.09 (dd, *J* = 17.6, 11.2 Hz, 1H, H19), 5.53 (d, *J* = 8.4 Hz, 1H, H14), 5.06 (d, *J* = 18.0 Hz, 1H, H20), 4.98 (d, *J* = 11.2 Hz, 1H, H20), 4.47 (s, 1H), 4.15 (ABq, *J* = 16.4 Hz, 2H, H22), 3.63 (t, *J* = 7.6 Hz, 2H), 3.39 (t, *J* = 5.2 Hz, 1H, H11), 3.01 (t, *J* = 7.6 Hz, 2H), 2.37 (s, 1H, H4), 2.24 – 1.99 (m, 4H, H10, H2, H13), 1.70 – 1.55 (m, 2H, H7), 1.54 – 1.34 (m, 3H, H1, H8), 1.32 (s, 3H, H18), 1.26 – 1.22 (m, 2H, H13, H6) 1.04



(s, 3H, H15), 1.00 (d,  $J=14.0$  Hz, 1H, H8), 0.81 (d,  $J=6.8$  Hz, 3H, H17), 0.61 (d,  $J=6.8$  Hz, 3H, H16);  $^{13}\text{C}$  NMR (101 MHz, DMSO- $d_6$ ):  $\delta$  (ppm) 217.6(C3), 170.9, 167.5(C21), 160.4, 159.5, 150.7, 141.2(C19), 140.8, 138.3, 129.0, 128.9, 128.7, 126.6, 125.0, 115.8(C20), 73.1(C11), 70.6(C14), 57.7(C4), 45.4(C22), 44.6(C9), 44.0(C13), 42.0(C12), 38.2, 36.9(C5), 36.8(C6), 34.5(C10), 31.2(C2), 30.6(C8), 29.7, 29.1(C7), 27.1(C18), 24.9(C1), 16.6(C16), 14.9(C15), 11.9(C17); IR (KBr,  $\text{cm}^{-1}$ ): 3430, 2924, 2863, 1731, 1595, 1558, 1469, 1382, 1353, 1272, 1191, 1142, 1115, 1019, 912, 700; HRMS: calculated for  $\text{C}_{36}\text{H}_{45}\text{N}_5\text{O}_5\text{S}$  ( $[\text{M} + \text{H}]^+$ ): 660.3214; found: 660.3224.

#### 1.4 Synthesis of compounds 6a-6p

BTC (49 mg, 0.16 mmol) was slowly added to the solution of substituted amines (0.16 mmol) and triethylamine (32 mg, 0.32 mmol) in dry DCM (4 mL) at 0 °C. The mixture was stirred at 0 °C for 0.5 h and then evaporated to afford the isocyanate intermediate. The compound **3** (84 mg, 0.16 mmol) and triethylamine (32 mg, 0.32 mmol) were added to a mixture of isocyanate intermediate in dry DCM. After stirring for 3 h at ambient temperature, the reaction mixture was concentrated to prepare the crude intermediate, which was purified through silica gel column chromatography to prepare **6a-6p**.

**6a**: White powder; yield: 55.9%; mp: 161.9-162.8 °C;  $^1\text{H}$  NMR (400 MHz,  $\text{CDCl}_3$ ):  $\delta$  (ppm) 10.56 (s, 1H), 8.44 (s, 1H), 7.62 (d,  $J=8.4$  Hz, 2H), 7.40 (t,  $J=7.6$  Hz, 2H), 7.20 (t,  $J=7.2$  Hz, 1H), 6.52 (dd,  $J=17.2, 11.2$  Hz, 1H, H19), 5.77 (d,  $J=8.4$  Hz, 1H, H14), 5.34 (d,  $J=11.2$  Hz, 1H, H20), 5.20 (d,  $J=17.2$  Hz, 1H, H20), 5.12 (s, 2H), 3.98

(ABq,  $J = 16.4$  Hz, 2H, H22), 3.34 (dd,  $J = 10.4, 6.4$  Hz, 1H, H11), 2.36 – 2.06 (m, 4H, H10, H2, H4), 2.03 – 1.96 (m, 1H, H13), 1.75 (d,  $J = 14.4$  Hz, 1H), 1.63 – 1.44 (m, 4H, H7, H1), 1.42 (s, 3H, H18), 1.40 – 1.30 (m, 3H, H8, H13, H6), 1.15 (s, 3H, H15), 1.12 (d,  $J = 4.4$  Hz, 1H, H8), 0.86 (d,  $J = 7.2$  Hz, 3H, H17), 0.76 (d,  $J = 7.2$  Hz, 3H, H16);  $^{13}\text{C}$  NMR (101 MHz,  $\text{CD}_3\text{OD}$ ):  $\delta$  (ppm) 219.6(C3), 169.6(C21), 161.2, 141.0(C19), 140.2, 130.2, 129.8, 124.0, 119.8, 116.7(C20), 75.5(C11), 71.8(C14), 61.5(C4), 59.2(C22), 46.8(C9), 45.6(C13), 45.3(C12), 43.2(C5), 38.1(C6), 37.6(C10), 35.3(C2), 31.5(C8), 28.2(C7), 28.0(C18), 25.8(C1), 17.1(C16), 14.5(C15), 11.7(C17); IR (KBr,  $\text{cm}^{-1}$ ): 3383, 3197, 3132, 2926, 1733, 1605, 1548, 1500, 1388, 1266, 1228, 1118, 913, 756; HRMS: calculated for  $\text{C}_{34}\text{H}_{42}\text{N}_6\text{O}_5\text{S}$  ( $[\text{M} + \text{Na}]^+$ ): 669.2830; found: 669.2836.

**6b**: White powder; yield: 62.5%; mp: 194.2-195.2 °C;  $^1\text{H}$  NMR (400 MHz,  $\text{CDCl}_3$ ):  $\delta$  (ppm) 10.98 (s, 1H), 8.45 (s, 1H), 8.28 (dd,  $J = 8.0, 1.6$  Hz, 1H), 7.15 (td,  $J = 8.0, 1.6$  Hz, 1H), 7.04 (t,  $J = 7.2$  Hz, 1H), 6.97 (d,  $J = 8.0$  Hz, 1H, H19), 6.52 (dd,  $J = 17.2, 11.2$  Hz, 1H, H14), 5.78 (d,  $J = 8.4$  Hz, 1H, H20), 5.34 (dd,  $J = 11.2, 1.6$  Hz, 1H, H20), 5.20 (dd,  $J = 17.2, 1.6$  Hz, 1H), 5.03 (s, 2H), 4.1-3.91 (m, 5H, H22), 3.34 (d,  $J = 4.8$  Hz, 1H, H11), 2.39 – 2.06 (m, 4H, H10, H2, H4), 2.01 (dd,  $J = 15.6, 8.4$  Hz, 1H, H13), 1.76 (d,  $J = 14.4$  Hz, 1H), 1.72 – 1.51 (m, 4H, H7, H1), 1.51 – 1.44 (m, 2H, H8, H13), 1.42 (s, 3H, H18), 1.40 – 1.34 (m, 1H, H6), 1.16 (s, 3H, H15), 1.11 (dd,  $J = 14.0, 4.4$  Hz, 1H, H8), 0.86 (d,  $J = 7.2$  Hz, 3H, H17), 0.78 (d,  $J = 7.2$  Hz, 3H, H16);  $^{13}\text{C}$  NMR (101 MHz,  $\text{DMSO}-d_6$ ):  $\delta$  (ppm) 217.6(C3), 167.4(C21), 160.5, 159.4, 149.8, 149.5, 146.6, 141.2(C19), 138.4, 126.4, 125.5, 124.7, 121.0, 120.8, 115.8(C20), 111.7, 73.1(C11), 70.7(C14), 57.7(C4), 56.8, 45.4(C22), 44.6(C9), 43.9(C13), 42.0(C12), 36.9(C5),

36.8(C6), 34.5(C10), 31.4(C2), 30.6(C8), 29.0(C7), 27.1(C18), 24.9(C1), 16.6(C16), 14.9(C15), 11.2(C17); IR (KBr,  $\text{cm}^{-1}$ ): 3506, 3370, 3132, 2935, 2883, 1731, 1604, 1548, 1495, 1462, 1388, 1262, 1231, 1108, 1026, 919, 747; HRMS: calculated for  $\text{C}_{35}\text{H}_{44}\text{N}_6\text{O}_6\text{S}$  ( $[\text{M} + \text{Na}]^+$ ): 699.2935; found: 699.2935.

**6c:** White powder; yield: 52.9%; mp: 188.2-189.4 °C;  $^1\text{H}$  NMR (400 MHz,  $\text{DMSO}-d_6$ ):  $\delta$  (ppm) 10.86 (s, 1H), 9.45 (s, 1H), 8.44 (s, 1H), 8.14 (s, 1H), 7.42 – 6.96 (m, 5H), 6.10 (dd,  $J = 17.6, 11.2$  Hz, 1H, H19), 5.54 (d,  $J = 8.0$  Hz, 1H, H14), 5.07 (d,  $J = 17.6$  Hz, 1H, H20), 4.99 (d,  $J = 11.2$  Hz, 1H, H20), 4.50 (d,  $J = 6.0$  Hz, 1H), 4.20 (ABq,  $J = 16.4$  Hz, 2H, H22), 3.41 (d,  $J = 5.2$  Hz, 1H, H11), 2.39 (s, 1H, H4), 2.26 – 2.00 (m, 4H, H10, H2, H13), 1.71 – 1.38 (m, 13H, H7, H1), 1.37 – 1.30 (m, 4H, H18, H8), 1.30 – 1.21 (m, 2H, H13, H6), 1.05 (s, 3H, H15), 0.98 (d,  $J = 13.2$  Hz, 1H, H8), 0.80 (d,  $J = 6.8$  Hz, 3H, H17), 0.62 (d,  $J = 6.8$  Hz, 3H, H16);  $^{13}\text{C}$  NMR (101 MHz,  $\text{DMSO}-d_6$ ):  $\delta$  (ppm) 217.6(C3), 167.4(C21), 160.6, 159.4, 153.2, 149.5, 146.5, 141.2, 140.8(C19), 138.2, 137.6, 129.5, 124.5, 115.8(C20), 115.2, 114.7, 110.6, 79.6, 73.1(C11), 70.7(C14), 57.7(C4), 45.4(C22), 44.6(C9), 43.9(C13), 42.0(C12), 36.9(C5), 36.8(C6), 34.5(C10), 31.4(C2), 30.6(C8), 29.1(C7), 28.6, 27.1(C18), 24.9(C1), 16.6(C16), 14.9(C15), 12.0(C17); IR (KBr,  $\text{cm}^{-1}$ ): 3428, 3348, 3223, 3139, 2929, 1741, 1712, 1605, 1548, 1384, 1275, 1228, 1157, 1014, 924, 787; HRMS: calculated for  $\text{C}_{39}\text{H}_{51}\text{N}_7\text{O}_7\text{S}$  ( $[\text{M} + \text{Na}]^+$ ): 784.3463; found: 784.3475.

**6d:** White powder; yield: 52.1%; mp: 142.4-144.0 °C;  $^1\text{H}$  NMR (400 MHz,  $\text{DMSO}-d_6$ ):  $\delta$  (ppm) 10.92 (s, 1H), 10.08 (s, 1H), 8.44 (s, 1H), 8.16 (s, 1H), 7.49 (d,  $J = 8.0$  Hz, 1H), 7.33 (t,  $J = 8.0$  Hz, 1H), 7.27 – 6.97 (m, 3H), 6.09 (dd,  $J = 17.6, 11.2$

Hz, 1H, H19), 5.54 (d,  $J = 8.0$  Hz, 1H, H14), 5.06 (dd,  $J = 17.6, 1.6$  Hz, 1H, H20), 4.99 (dd,  $J = 11.2, 1.6$  Hz, 1H, H20), 4.53 (d,  $J = 6.0$  Hz, 1H), 4.19 (ABq,  $J = 16.4$  Hz, 2H, H22), 3.40 (t,  $J = 6.0$  Hz, 1H, H11), 2.39 (s, 1H, H4), 2.26 – 2.00 (m, 7H, H10, H2, H13), 1.70 – 1.37 (m, 4H, H7, H1), 1.37 – 1.31 (m, 4H, H18, H8), 1.30 – 1.19 (m, 2H, H13, H6), 1.05 (s, 3H, H15), 0.97 (d,  $J = 13.6$  Hz, 1H, H8), 0.80 (d,  $J = 6.8$  Hz, 3H, H17), 0.62 (d,  $J = 6.8$  Hz, 3H, H16);  $^{13}\text{C}$  NMR (101 MHz, DMSO- $d_6$ ):  $\delta$  (ppm) 217.2(C3), 168.4(C21), 166.9, 160.1, 158.9, 149.0, 146.1, 140.8, 140.1(C19), 137.8, 137.2, 129.2, 124.0, 115.5(C20), 115.4, 115.1, 110.7, 72.6(C11), 70.2(C14), 57.2(C4), 45.0(C22), 44.1(C9), 43.4(C13), 41.6(C12), 36.4(C5), 36.3(C6), 34.0(C10), 30.9(C2), 30.1(C8), 28.6(C7), 26.6(C18), 24.5(C1), 24.0, 16.2(C16), 14.5(C15), 11.6(C17); IR (KBr,  $\text{cm}^{-1}$ ): 3375, 2931, 1732, 1611, 1550, 1463, 1388, 1228, 1117, 921, 785; HRMS: calculated for  $\text{C}_{36}\text{H}_{45}\text{N}_7\text{O}_6\text{S}$  ( $[\text{M} + \text{Na}]^+$ ): 726.3044; found: 726.3038.

**6e**: White powder; yield: 55.1%; mp: 165.0-166.2 °C;  $^1\text{H}$  NMR (400 MHz, DMSO- $d_6$ ):  $\delta$  (ppm) 11.22 (s, 1H), 8.45 (s, 1H), 7.70 (d,  $J = 11.2$  Hz, 1H), 7.63 (d,  $J = 8.4$  Hz, 1H), 7.47 (q,  $J = 8.0$  Hz, 1H), 7.24 (s, 2H), 7.02 (td,  $J = 8.4, 2.0$  Hz, 1H), 6.09 (dd,  $J = 17.6, 11.2$  Hz, 1H, H19), 5.54 (d,  $J = 8.0$  Hz, 1H, H14), 5.07 (d,  $J = 17.6$  Hz, 1H, H20), 4.99 (d,  $J = 11.2$  Hz, 1H, H20), 4.52 (d,  $J = 6.0$  Hz, 1H), 4.19 (ABq,  $J = 16.4$  Hz, 2H, H22), 3.40 (t,  $J = 5.6$  Hz, 1H, H11), 2.39 (s, 1H, H4), 2.24 – 2.00 (m, 4H, H10, H2, H13), 1.74 – 1.37 (m, 4H, H7, H1), 1.36 – 1.29 (m, 4H, H18, H8), 1.29 – 1.18 (m, 2H, H13, H6) 1.05 (s, 3H, H15), 0.97 (d,  $J = 13.2$  Hz, 1H, H8), 0.80 (d,  $J = 6.8$  Hz, 3H, H17), 0.62 (d,  $J = 6.8$  Hz, 3H, H16);  $^{13}\text{C}$  NMR (101 MHz, DMSO- $d_6$ ):  $\delta$  (ppm) 217.2(C3), 166.9(C21), 163.6, 161.2, 160.3, 158.9, 148.9, 146.2, 140.8, 138.9(C19),

138.8, 137.6, 131.0, 130.9, 123.9, 115.5(C20), 115.4, 111.2, 111.0, 106.7, 106.5, 72.6(C11), 70.2(C14), 57.2(C4), 45.0(C22), 44.2(C9), 43.4(C13), 41.6(C12), 36.4(C5), 36.3(C6), 34.0(C10), 30.9(C2), 30.1(C8), 28.7(C7), 26.6(C18), 24.5(C1), 16.2(C16), 14.5(C15), 11.6(C17); IR (KBr,  $\text{cm}^{-1}$ ): 3446, 2925, 1733, 1624, 1555, 1457, 1391, 1228, 1117, 921, 786; HRMS: calculated for  $\text{C}_{34}\text{H}_{41}\text{FN}_6\text{O}_5\text{S}$  ( $[\text{M} + \text{Na}]^+$ ): 687.2735; found: 687.2741.

**6f**: White powder; yield: 53.1%; mp: 137.6-138.6 °C;  $^1\text{H}$  NMR (400 MHz,  $\text{DMSO-}d_6$ ):  $\delta$  (ppm) 11.04 (s, 1H), 8.44 (s, 1H), 7.79 (dd,  $J = 9.2, 4.8$  Hz, 2H), 7.40 – 6.94 (m, 4H), 6.09 (dd,  $J = 17.6, 11.2$  Hz, 1H, H19), 5.54 (d,  $J = 8.4$  Hz, 1H, H14), 5.06 (dd,  $J = 17.6, 1.6$  Hz, 1H, H20), 4.98 (dd,  $J = 11.2, 1.6$  Hz, 1H, H20), 4.52 (d,  $J = 6.0$  Hz, 1H), 4.19 (ABq,  $J = 16.4$  Hz, 2H, H22), 3.40 (s, 1H, H11), 2.38 (s, 1H, H4), 2.27 – 1.99 (m, 4H, H10, H2, H13), 1.72 – 1.37 (m, 4H, H7, H1), 1.37 – 1.29 (m, 4H, H18, H8), 1.29 – 1.19 (m, 2H, H13, H6), 1.04 (s, 3H, H15), 0.96 (dd,  $J = 13.2, 3.6$  Hz, 1H, H8), 0.80 (d,  $J = 6.8$  Hz, 3H, H17), 0.61 (d,  $J = 6.8$  Hz, 3H, H16);  $^{13}\text{C}$  NMR (101 MHz,  $\text{DMSO-}d_6$ ):  $\delta$  (ppm) 217.3(C3), 167.0(C21), 162.4, 160.2, 160.1, 158.9, 157.7, 149.0, 146.3, 140.8(C19), 137.7, 133.4, 124.0, 121.8, 121.7, 116.0, 115.8(C20), 115.4, 72.7(C11), 70.3(C14), 57.2(C4), 45.0(C22), 44.2(C9), 43.4(C13), 41.6(C12), 36.5(C5), 36.4(C6), 34.0(C10), 30.9(C2), 30.1(C8), 28.7(C7), 26.6(C18), 24.5(C1), 16.2(C16), 14.5(C15), 11.6(C17); IR (KBr,  $\text{cm}^{-1}$ ): 3430, 2926, 1731, 1626, 1602, 1563, 1510, 1463, 1388, 1225, 1117, 1017, 922, 835; HRMS: calculated for  $\text{C}_{34}\text{H}_{41}\text{FN}_6\text{O}_5\text{S}$  ( $[\text{M} + \text{Na}]^+$ ): 687.2735; found: 687.2738.

**6g**: White powder; yield: 51.6%; mp: 192.9-193.7 °C; <sup>1</sup>H NMR (400 MHz, DMSO-*d*<sub>6</sub>): δ (ppm) 11.01 (s, 1H), 8.48 (s, 1H), 8.25 (dd, *J* = 8.0, 1.2 Hz, 1H), 7.60 (dd, *J* = 8.0, 1.2 Hz, 1H), 7.42 (td, *J* = 8.0, 1.2 Hz, 1H), 7.23 (td, *J* = 8.0, 1.2 Hz, 1H), 6.93 (s, 2H), 6.09 (dd, *J* = 17.6, 11.2 Hz, 1H, H19), 5.54 (d, *J* = 8.0 Hz, 1H, H14), 5.07 (dd, *J* = 17.6, 1.6 Hz, 1H, H20), 4.99 (dd, *J* = 11.2, 1.6 Hz, 1H, H20), 4.51 (s, 1H), 4.19 (ABq, *J* = 16.4 Hz, 2H, H22), 3.40 (s, 1H, H11), 2.39 (s, 1H, H4), 2.27 – 2.00 (m, 4H, H10, H2, H13), 1.74 – 1.37 (m, 4H, H7, H1), 1.36 – 1.30 (m, 4H, H18, H8), 1.30 – 1.19 (m, 2H, H13, H6), 1.04 (s, 3H, H15), 1.01 – 0.91 (m, 1H, H8), 0.80 (d, *J* = 6.8 Hz, 3H, H17), 0.62 (d, *J* = 6.8 Hz, 3H, H16); <sup>13</sup>C NMR (101 MHz, DMSO-*d*<sub>6</sub>): δ (ppm) 217.2(C3), 166.9(C21), 160.2, 158.9, 149.0, 146.4, 140.8(C19), 137.9, 133.9, 129.6, 127.9, 126.0, 124.3, 124.0, 122.4, 115.4(C20), 72.6(C11), 70.2(C14), 57.2(C4), 45.0(C22), 44.1(C9), 43.4(C13), 41.6(C12), 36.4(C5), 36.3(C6), 34.0(C10), 30.9(C2), 30.1(C8), 28.6(C7), 26.6(C18), 24.5(C1), 16.2(C16), 14.4(C15), 11.6(C17); IR (KBr, cm<sup>-1</sup>): 3545, 3433, 3231, 3109, 2926, 2868, 1742, 1608, 1542, 1455, 1388, 1226, 1116, 1015, 917, 761; HRMS: calculated for C<sub>34</sub>H<sub>41</sub>ClN<sub>6</sub>O<sub>5</sub>S ([M + Na]<sup>+</sup>): 703.2440; found: 703.2437.

**6h**: White powder; yield: 52.5%; mp: 158.1-158.8 °C; <sup>1</sup>H NMR (400 MHz, DMSO-*d*<sub>6</sub>): δ (ppm) 11.28 (s, 1H), 8.47 (s, 1H), 8.17 (s, 1H), 8.06 (d, *J* = 8.0 Hz, 1H), 7.69 (t, *J* = 8.0 Hz, 1H), 7.56 (d, *J* = 8.0 Hz, 1H), 7.25 (s, 2H), 6.09 (dd, *J* = 17.6, 11.2 Hz, 1H, H19), 5.54 (d, *J* = 8.0 Hz, 1H, H14), 5.07 (dd, *J* = 17.6, 1.6 Hz, 1H, H20), 4.99 (dd, *J* = 11.2, 1.6 Hz, 1H, H20), 4.51 (s, 1H), 4.20 (ABq, *J* = 16.4 Hz, 2H, H22), 3.41 (s, 1H, H11), 2.39 (s, 1H, H4), 2.25 – 2.00 (m, 4H, H10, H2, H13), 1.73 – 1.42 (m, 4H, H7,

H1), 1.41 – 1.23 (m, 6H, H18, H8, H13, H6), 1.05 (s, 3H, H15), 0.97 (dd,  $J = 13.2, 3.2$  Hz, 1H, H8), 0.80 (d,  $J = 6.8$  Hz, 3H, H17), 0.62 (d,  $J = 6.8$  Hz, 3H, H16);  $^{13}\text{C}$  NMR (101 MHz, DMSO- $d_6$ ):  $\delta$  (ppm) 217.2(C3), 166.9(C21), 160.3, 158.9, 148.9, 146.5, 140.8(C19), 138.0, 137.6, 130.4, 130.1, 128.8, 123.9, 121.04, 123.6, 115.9, 115.4(C20), 72.6(C11), 70.3(C14), 57.2(C4), 45.0(C22), 44.2(C9), 43.4(C13), 41.6(C12), 36.4(C5), 36.3(C6), 34.0(C10), 30.8(C2), 30.1(C8), 28.7(C7), 26.6(C18), 24.5(C1), 16.2(C16), 14.5(C15), 11.6(C17); IR (KBr,  $\text{cm}^{-1}$ ): 3415, 3130, 3079, 2931, 1740, 1614, 1552, 1461, 1388, 1323, 1229, 1114, 1066, 1016, 921, 844; HRMS: calculated for  $\text{C}_{35}\text{H}_{41}\text{F}_3\text{N}_6\text{O}_5\text{S}$  ( $[\text{M} + \text{H}]^+$ ): 715.2884; found: 715.2879.

**6i**: White powder; yield: 50.7%; mp: 186.6-187.6 °C;  $^1\text{H}$  NMR (400 MHz, DMSO- $d_6$ ):  $\delta$  (ppm) 9.20 (t,  $J = 6.4$  Hz, 1H), 8.36 (s, 1H), 7.48 – 7.32 (m, 4H), 7.31 – 7.23 (m, 1H), 6.89 (s, 2H), 6.08 (dd,  $J = 17.6, 11.2$  Hz, 1H, H19), 5.53 (d,  $J = 8.4$  Hz, 1H, H14), 5.05 (dd,  $J = 17.6, 1.6$  Hz, 1H, H20), 4.98 (dd,  $J = 11.2, 1.6$  Hz, 1H, H20), 4.62 (d,  $J = 6.0$  Hz, 2H), 4.47 (d,  $J = 6.0$  Hz, 1H), 4.19 (ABq,  $J = 16.4$  Hz, 2H, H22), 3.40 (t,  $J = 6.0$  Hz, 1H, H11), 2.38 (s, 1H, H4), 2.27 – 1.94 (m, 4H, H10, H2, H13), 1.73 – 1.35 (m, 4H, H7, H1), 1.34 – 1.28 (m, 4H, H18, H8), 1.28 – 1.19 (m, 2H, H13, H6), 1.03 (s, 3H, H15), 0.98 (dd,  $J = 13.6, 4.0$  Hz, 1H, H8), 0.81 (d,  $J = 6.8$  Hz, 3H, H17), 0.61 (d,  $J = 6.8$  Hz, 3H, H16);  $^{13}\text{C}$  NMR (101 MHz, DMSO- $d_6$ ):  $\delta$  (ppm) 217.2(C3), 166.9(C21), 159.9, 159.1, 149.2, 149.0, 140.7(C19), 138.2, 137.8, 128.6, 127.2, 127.0, 124.1, 115.3(C20), 72.6(C11), 70.2(C14), 57.2(C4), 45.0(C22), 44.1(C9), 43.4(C13), 43.1, 41.5(C12), 36.4(C5), 36.3(C6), 34.0(C10), 30.9(C2), 30.1(C8), 28.6(C7), 26.6(C18), 24.5(C1), 16.1(C16), 14.5(C15), 11.7(C17); IR (KBr,  $\text{cm}^{-1}$ ): 3422, 2925, 2855, 1735,

1606, 1547, 1465, 1388, 1260, 1114, 1019, 917, 803; HRMS: calculated for  $C_{35}H_{44}N_6O_5S$  ( $[M + Na]^+$ ): 683.2986; found: 683.2997.

**6j**: White powder; yield: 59.5%; mp: 113.6-114.7 °C;  $^1H$  NMR (400 MHz, DMSO- $d_6$ ):  $\delta$  (ppm) 8.83 (t,  $J = 5.2$  Hz, 1H), 8.32 (s, 1H), 7.30 (d,  $J = 4.4$  Hz, 4H), 7.25 – 7.15 (m, 1H), 6.88 (s, 2H), 6.08 (dd,  $J = 17.6, 11.2$  Hz, 1H, H19), 5.53 (d,  $J = 8.4$  Hz, 1H, H14), 5.05 (dd,  $J = 17.6, 1.2$  Hz, 1H, H20), 4.97 (dd,  $J = 11.2, 1.2$  Hz, 1H, H20), 4.53 (s, 1H), 4.18 (ABq,  $J = 16.4$  Hz, 2H, H22), 3.59 (q,  $J = 6.8$  Hz, 2H), 3.40 (s, 1H, H11), 2.93 (t,  $J = 7.2$  Hz, 2H), 2.38 (s, 1H, H4), 2.24 – 1.98 (m, 4H, H10, H2, H13), 1.69 – 1.35 (m, 4H, H7, H1), 1.33 – 1.27 (m, 4H, H18, H8), 1.25 – 1.19 (m, 2H, H13, H6), 1.04 (s, 3H, H15), 0.97 (dd,  $J = 13.2, 3.6$  Hz, 1H, H8), 0.80 (d,  $J = 6.8$  Hz, 3H, H17), 0.60 (d,  $J = 6.8$  Hz, 3H, H16);  $^{13}C$  NMR (101 MHz, DMSO- $d_6$ ):  $\delta$  (ppm) 217.2(C3), 167.0(C21), 159.9, 159.0, 149.1, 148.6, 140.7, 138.7(C19), 137.7, 128.8, 128.5, 126.4, 124.1, 115.3(C20), 72.6(C11), 70.2(C14), 57.2(C4), 45.0(C22), 44.1(C9), 43.4(C13), 41.5(C12), 41.4, 36.4(C5), 36.3(C6), 34.9, 34.0(C10), 30.9(C2), 30.1(C8), 28.6(C7), 26.6(C18), 24.5(C1), 16.1(C16), 14.4(C15), 11.6(C17); IR (KBr,  $cm^{-1}$ ): 3437, 2925, 1730, 1604, 1547, 1456, 1389, 1230, 1139, 1116, 1018, 919, 700; HRMS: calculated for  $C_{36}H_{46}N_6O_5S$  ( $[M + Na]^+$ ): 697.3143; found: 697.3138.

**6k**: White powder; yield: 61.5%; mp: 134.8-135.9 °C;  $^1H$  NMR (400 MHz, DMSO- $d_6$ ):  $\delta$  (ppm) 9.15 (s, 1H), 8.36 (s, 1H), 7.26 (d,  $J = 7.2$  Hz, 2H), 7.16 (d,  $J = 7.2$  Hz, 2H), 6.91 (s, 2H), 6.09 (dd,  $J = 17.6, 11.2$  Hz, 1H, H19), 5.53 (d,  $J = 7.6$  Hz, 1H, H14), 5.05 (d,  $J = 17.6$  Hz, 1H, H20), 4.98 (d,  $J = 11.2$  Hz, 1H, H20), 4.56 (d,  $J = 5.2$  Hz, 2H), 4.50 (d,  $J = 5.2$  Hz, 1H), 4.18 (ABq,  $J = 16.4$  Hz, 2H, H22), 3.40 (s, 1H, H11),



2.38 (s, 1H, H4), 2.28 (s, 3H), 2.22 – 1.97 (m, 4H, H10, H2, H13), 1.77 – 1.38 (m, 4H, H7, H1), 1.36 – 1.28 (m, 4H, H18, H8), 1.27 – 1.18 (m, 2H, H13, H6), 1.04 (s, 3H, H15), 0.97 (d,  $J = 13.2$  Hz, 1H, H8), 0.80 (d,  $J = 6.0$  Hz, 3H, H17), 0.61 (d,  $J = 6.0$  Hz, 3H, H16);  $^{13}\text{C}$  NMR (101 MHz, DMSO- $d_6$ ):  $\delta$  (ppm) 217.6(C3), 167.4(C21), 160.3, 159.5, 149.7, 149.4, 141.2, 138.3(C19), 136.8, 135.6, 129.6, 129.2, 127.5, 127.5, 124.6, 115.8(C20), 73.1(C11), 70.6(C14), 57.7(C4), 45.4(C22), 44.6(C9), 43.9(C13), 43.4, 42.0(C12), 36.9(C5), 36.8(C6), 34.5(C10), 31.4(C2), 30.6(C8), 29.1(C7), 27.1(C18), 24.9(C1), 21.2, 16.6(C16), 14.9(C15), 12.0(C17); IR (KBr,  $\text{cm}^{-1}$ ): 3435, 2925, 1729, 1613, 1548, 1461, 1388, 1228, 1116, 1047, 917; HRMS: calculated for  $\text{C}_{36}\text{H}_{46}\text{N}_6\text{O}_5\text{S}$  ( $[\text{M} + \text{Na}]^+$ ): 697.3143; found: 697.3152.

**6l**: White powder; yield: 60.5%; mp: 167.1-168.2 °C;  $^1\text{H}$  NMR (400 MHz, DMSO- $d_6$ ):  $\delta$  (ppm) 9.12 (s, 1H), 8.35 (s, 1H), 7.30 (d,  $J = 7.2$  Hz, 2H), 6.91 (d,  $J = 6.8$  Hz, 4H), 6.08 (dd,  $J = 17.2, 11.2$  Hz, 1H, H19), 5.53 (d,  $J = 6.8$  Hz, 1H, H14), 5.05 (d,  $J = 17.6$  Hz, 1H, H20), 4.97 (d,  $J = 10.8$  Hz, 1H, H20), 4.61 – 4.44 (m, 3H), 4.19 (ABq,  $J = 16.4$  Hz, 2H, H22), 3.73 (s, 3H), 3.40 (s, 1H, H11), 2.38 (s, 1H, H4), 2.27 – 1.94 (m, 4H, H10, H2, H13), 1.70 – 1.39 (m, 4H, H7, H1), 1.36 – 1.28 (m, 4H, H18, H8), 1.27 – 1.19 (m, 2H, H13, H6), 1.03 (s, 3H, H15), 0.99 (d,  $J = 10.8$  Hz, 1H, H8), 0.80 (d,  $J = 6.4$  Hz, 3H, H17), 0.60 (d,  $J = 6.4$  Hz, 3H, H16);  $^{13}\text{C}$  NMR (101 MHz, DMSO- $d_6$ ):  $\delta$  (ppm) 217.6(C3), 167.4(C21), 160.3, 159.5, 159.0, 149.7, 149.3, 141.2, 138.3(C19), 130.5, 128.9, 124.6, 115.8(C20), 114.4, 73.1(C11), 70.6(C14), 57.7(C4), 55.6, 45.4(C22), 44.6(C9), 43.9(C13), 43.1, 42.0(C12), 36.9(C5), 36.8(C6), 34.5(C10), 31.3(C2), 30.6(C8), 29.1(C7), 27.1(C18), 24.9(C1), 16.6(C16), 14.9(C15), 12.0(C17);

IR (KBr,  $\text{cm}^{-1}$ ): 3431, 2929, 1730, 1609, 1547, 1513, 1463, 1388, 1244, 1179, 1116, 1030, 915; HRMS: calculated for  $\text{C}_{36}\text{H}_{46}\text{N}_6\text{O}_6\text{S}$  ( $[\text{M} + \text{H}]^+$ ): 691.3272; found: 691.3271.

**6m**: White powder; yield: 45.1%; mp: 146.4-147.5 °C;  $^1\text{H}$  NMR (400 MHz,  $\text{DMSO}-d_6$ ):  $\delta$  (ppm) 9.19 (t,  $J = 6.0$  Hz, 1H), 8.36 (s, 1H), 7.27 (t,  $J = 8.0$  Hz, 1H), 6.99 – 6.80 (m, 5H), 6.09 (dd,  $J = 17.6, 11.2$  Hz, 1H, H19), 5.54 (d,  $J = 8.0$  Hz, 1H, H14), 5.05 (dd,  $J = 17.6, 1.6$  Hz, 1H, H20), 4.98 (dd,  $J = 11.2, 1.6$  Hz, 1H, H20), 4.59 (d,  $J = 6.0$  Hz, 2H), 4.50 (d,  $J = 6.0$  Hz, 1H), 4.21 (ABq,  $J = 16.4$  Hz, 2H, H22), 3.74 (s, 3H), 3.40 (t,  $J = 5.6$  Hz, 1H, H11), 2.37 (s, 1H, H4), 2.28 – 1.98 (m, 4H, H10, H2, H13), 1.70 – 1.37 (m, 4H, H7, H1), 1.36 – 1.28 (m, 4H, H18, H8), 1.29 – 1.22 (m, 2H, H13, H6), 1.04 (s, 3H, H15), 0.97 (d,  $J = 13.2$  Hz, 1H, H8), 0.80 (d,  $J = 6.8$  Hz, 3H, H17), 0.61 (d,  $J = 6.8$  Hz, 3H, H16);  $^{13}\text{C}$  NMR (101 MHz,  $\text{DMSO}-d_6$ ):  $\delta$  (ppm) 217.6(C3), 167.4(C21), 160.3, 159.9, 159.5, 149.7, 149.5, 141.2, 140.2, 138.3(C19), 130.2, 124.6, 119.6, 115.8(C20), 113.2, 113.1, 73.1(C11), 70.6(C14), 57.7(C4), 55.5, 45.4(C22), 44.6(C9), 43.9(C13), 43.5, 42.0(C12), 36.9(C5), 36.8(C6), 34.5(C10), 31.4(C2), 30.6(C8), 29.0(C7), 27.1(C18), 24.9(C1), 16.6(C16), 14.9(C15), 12.0(C17); IR (KBr,  $\text{cm}^{-1}$ ): 3421, 2931, 1729, 1602, 1547, 1463, 1388, 1265, 1229, 1152, 1026, 915, 786; HRMS: calculated for  $\text{C}_{36}\text{H}_{46}\text{N}_6\text{O}_6\text{S}$  ( $[\text{M} + \text{H}]^+$ ): 691.3272; found: 691.3268.

**6n**: White powder; yield: 48.5%; mp: 123.8-125.2 °C;  $^1\text{H}$  NMR (400 MHz,  $\text{DMSO}-d_6$ ):  $^1\text{H}$  NMR (400 MHz,  $\text{DMSO}-d_6$ ):  $\delta$  (ppm) 9.15 (t,  $J = 6.4$  Hz, 1H), 8.34 (s, 1H), 7.28 (t,  $J = 6.8$  Hz, 2H), 7.06 – 6.99 (m, 1H), 6.95 – 6.82 (m, 3H), 6.08 (dd,  $J = 17.6, 11.2$  Hz, 1H, H19), 5.53 (d,  $J = 8.4$  Hz, 1H, H14), 5.04 (dd,  $J = 17.6, 1.6$  Hz, 1H, H20), 4.97 (dd,  $J = 11.2, 1.6$  Hz, 1H, H20), 4.54 (d,  $J = 6.4$  Hz, 2H), 4.50 (d,  $J = 6.0$

Hz, 1H), 4.21 (ABq,  $J = 16.4$  Hz, 2H, H22), 3.87 (s, 3H), 3.39 (t,  $J = 6.0$  Hz, 1H, H11), 2.38 (s, 1H, H4), 2.24 – 2.00 (m, 4H, H10, H2, H13), 1.72 – 1.34 (m, 4H, H7, H1), 1.33 – 1.28 (m, 4H, H18, H8), 1.27 – 1.22 (m, 2H, H13, H6), 1.03 (s, 3H, H15), 0.97 (dd,  $J = 13.6, 4.0$  Hz, 1H, H8), 0.80 (d,  $J = 6.8$  Hz, 3H, H17), 0.61 (d,  $J = 6.8$  Hz, 3H, H16);  $^{13}\text{C}$  NMR (101 MHz, DMSO- $d_6$ ):  $\delta$  (ppm) 217.6(C3), 167.4(C21), 160.3, 159.6, 157.3, 149.7, 149.2, 141.2, 138.3(C19), 129.2, 128.5, 126.0, 124.6, 120.8, 115.8(C20), 111.2, 73.1(C11), 70.6(C14), 57.7(C4), 55.9, 45.4(C22), 44.6(C9), 43.9(C13), 42.0(C12), 36.9(C5), 36.8(C6), 34.5(C10), 31.3(C2), 30.6(C8), 29.0(C7), 27.1(C18), 24.9(C1), 16.6(C16), 14.9(C15), 12.0(C17); IR (KBr,  $\text{cm}^{-1}$ ): 3430, 2926, 1729, 1603, 1543, 1496, 1463, 1387, 1246, 1118, 1026, 915; HRMS: calculated for  $\text{C}_{36}\text{H}_{46}\text{N}_6\text{O}_6\text{S}$  ( $[\text{M} + \text{H}]^+$ ): 691.3272; found: 691.3278.

**60:** Light yellow powder; yield: 59.2%; mp: 128.1-129.4 °C;  $^1\text{H}$  NMR (400 MHz, DMSO- $d_6$ ):  $\delta$  (ppm) 8.80 (t,  $J = 5.6$  Hz, 1H), 8.31 (s, 1H), 7.18 (d,  $J = 8.0$  Hz, 2H), 7.10 (d,  $J = 8.0$  Hz, 2H), 6.84 (s, 2H), 6.09 (dd,  $J = 17.6, 11.2$  Hz, 1H, H19), 5.53 (d,  $J = 8.0$  Hz, 1H, H14), 5.05 (dd,  $J = 17.6, 1.6$  Hz, 1H, H20), 4.97 (dd,  $J = 11.2, 1.6$  Hz, 1H, H20), 4.50 (d,  $J = 6.0$  Hz, 1H), 4.20 (ABq,  $J = 16.4$  Hz, 2H, H22), 3.56 (q,  $J = 6.8$  Hz, 2H), 3.40 (t,  $J = 6.0$  Hz, 1H, H11), 2.38 (s, 1H, H4), 2.22 – 1.97 (m, 4H, H10, H2, H13), 1.71 – 1.34 (m, 4H, H7, H1), 1.34 – 1.28 (m, 4H, H18, H8), 1.28 – 1.22 (m, 2H, H13, H6), 1.04 (s, 3H, H15), 0.98 (dd,  $J = 13.6, 4.0$  Hz, 1H, H8), 0.81 (d,  $J = 6.8$  Hz, 3H, H17), 0.60 (d,  $J = 6.8$  Hz, 3H, H16);  $^{13}\text{C}$  NMR (101 MHz, DMSO- $d_6$ ):  $\delta$  (ppm) 217.6(C3), 167.4(C21), 160.4, 159.6, 149.7, 149.6, 147.2, 146.6, 141.2, 138.2(C19), 128.6, 124.6, 124.2, 115.8(C20), 73.1(C11), 70.6(C14), 57.7(C4), 45.4(C22), 44.6(C9),

43.9(C13), 42.0, 41.9(C12), 36.9(C5), 36.8(C6), 34.5(C10), 31.3(C2), 30.6(C8), 29.1(C7), 27.1(C18), 24.9(C1), 16.6(C16), 14.9(C15), 12.0(C17); IR (KBr,  $\text{cm}^{-1}$ ): 3445, 2926, 1730, 1606, 1547, 1521, 1457, 1398, 1345, 1229, 1114, 916, 619; HRMS: calculated for  $\text{C}_{35}\text{H}_{43}\text{N}_7\text{O}_7\text{S}$  ( $[\text{M} + \text{H}]^+$ ): 706.3017; found: 706.3024.

**6p**: White powder; yield:42.9%; mp: 116.3-117.5 °C;  $^1\text{H}$  NMR (400 MHz,  $\text{DMSO}-d_6$ ):  $\delta$  (ppm) 9.33 (t,  $J = 6.0$  Hz, 1H), 8.36 (s, 1H), 8.25 (s, 1H), 8.15 (dd,  $J = 8.0, 1.6$  Hz, 1H), 7.86 (d,  $J = 7.6$  Hz, 1H), 7.67 (t,  $J = 8.0$  Hz, 1H), 6.87 (s, 2H), 6.08 (dd,  $J = 17.6, 11.2$  Hz, 1H, H19), 5.53 (d,  $J = 8.4$  Hz, 1H, H14), 5.05 (dd,  $J = 17.6, 1.6$  Hz, 1H, H20), 4.98 (dd,  $J = 11.2, 1.6$  Hz, 1H, H20), 4.74 (d,  $J = 6.0$  Hz, 2H), 4.49 (d,  $J = 6.0$  Hz, 1H), 4.18 (ABq,  $J = 16.4$  Hz, 2H, H22), 3.40 (t,  $J = 6.0$  Hz, 1H, H11), 2.38 (s, 1H, H4), 2.23 – 1.98 (m, 4H, H10, H2, H13), 1.69 – 1.34 (m, 4H, H7, H1), 1.33 – 1.28 (m, 4H, H18, H8), 1.28 – 1.21 (m, 2H, H13, H6), 1.03 (s, 3H, H15), 0.97 (dd,  $J = 14.0, 4.4$  Hz, 1H, H8), 0.80 (d,  $J = 6.8$  Hz, 3H, H17), 0.61 (d,  $J = 6.8$  Hz, 3H, H16);  $^{13}\text{C}$  NMR (101 MHz,  $\text{DMSO}-d_6$ ):  $\delta$  (ppm) 217.6(C3), 167.4(C21), 160.3, 159.5, 149.7, 149.6, 148.4, 141.2, 141.1, 138.3(C19), 134.4, 130.6, 124.6, 122.7, 122.4, 115.8(C20), 73.1(C11), 70.6(C14), 57.7(C4), 45.4(C22), 44.6(C9), 43.9(C13), 43.1, 42.0(C12), 36.9(C5), 36.8(C6), 34.5(C10), 31.3(C2), 30.6(C8), 29.1(C7), 27.1(C18), 24.9(C1), 16.6(C16), 14.9(C15), 11.9. (C17) IR (KBr,  $\text{cm}^{-1}$ ): 3407, 2925, 1730, 1605, 1546, 1462, 1388, 1349, 1228, 1115, 916, 786; HRMS: calculated for  $\text{C}_{35}\text{H}_{43}\text{N}_7\text{O}_7\text{S}$  ( $[\text{M} + \text{Na}]^+$ ): 728.2837; found: 728.2853.

## 1.5 Synthesis of compound 7

To a solution of compound **3** (2.26 g, 4.3 mmol) and NMM (0.86 g, 8.6 mmol) in 20 mL of anhydrous THF, chloroacetyl chloride (1.93 g, 17.2 mmol) was slowly added after the solution cooled to 0 °C. The mixture was stirred at ambient temperature for 12 h. Then, it was poured into water (40 mL) and extracted with DCM (20 mL×3), the organic phase was concentrated to obtain the crude intermediate, which was purified through silica gel column chromatography to prepare compound **7**.

**7**: Light yellow powder; yield: 71.5%; mp: 201.5-202.6 °C; <sup>1</sup>H NMR (400 MHz, CDCl<sub>3</sub>): δ (ppm) 13.07 (s, 1H), 9.14 (s, 1H), 8.32 (s, 1H), 6.44 (dd, *J* = 17.6, 11.2 Hz, 1H, H19), 5.76 (d, *J* = 8.4 Hz, 1H, H14), 5.29 (d, *J* = 11.2 Hz, 1H, H20), 5.15 (d, *J* = 17.6 Hz, 1H, H20), 4.39 (s, 2H), 4.17 – 3.98 (m, 2H, H22), 3.33 (d, *J* = 6.4 Hz, 1H, H11), 2.33 – 2.11 (m, 4H, H10, H2, H4), 2.01 (dd, *J* = 16.0, 8.4 Hz 1H, H13), 1.79 – 1.71 (m, 1H), 1.71 – 1.52 (m, 4H, H7, H1), 1.44 (dd, *J* = 8.4, 5.2 Hz, 2H, H8, H13), 1.40 (s, 3H, H18), 1.36 (d, *J* = 14.4 Hz, 1H, H6), 1.17 – 1.06 (m, 4H, H15, H8), 0.84 (d, *J* = 6.8 Hz, 3H, H17), 0.75 (d, *J* = 6.8 Hz, 3H, H16); <sup>13</sup>C NMR (101 MHz, CDCl<sub>3</sub>): δ (ppm) 217.5(C3), 167.5(C21), 165.1, 151.8, 143.5, 141.2(C19), 115.6(C20), 73.1(C11), 70.7(C14), 57.7(C4), 45.4, 44.7(C22), 44.6(C9), 43.8(C13), 42.0(C12), 36.9(C5), 36.8(C6), 34.5(C10), 31.7(C2), 30.6(C8), 29.0(C7), 27.0(C18), 24.9(C1), 16.5(C16), 14.8(C15), 11.9(C17); IR (KBr, cm<sup>-1</sup>): 3399, 3153, 2931, 1726, 1582, 1522, 1426, 1378, 1256, 1152, 1116, 1048, 912, 638; HRMS: calculated for C<sub>29</sub>H<sub>38</sub>ClN<sub>5</sub>O<sub>5</sub>S ([M + H]<sup>+</sup>): 604.2355; found: 604.2361.

## 1.6 Synthesis of compounds 8a-8g

K<sub>2</sub>CO<sub>3</sub> (110 mg, 0.8 mmol) was added to a solution of compound 7 (242 mg, 0.4 mmol) in 5 mL of dry THF, and the solution was stirred at 60 °C with different secondary amines (0.5 mmol) for 10 h. The reaction was monitored using TLC. After the reaction completed, it was concentrated. The obtained residues were purified through column chromatography to give compounds **8a-8g**.

**8a**: White powder; yield: 50.8%; mp: 118.7-119.6 °C; <sup>1</sup>H NMR (400 MHz, CDCl<sub>3</sub>): δ (ppm) 13.48 (s, 1H), 10.03 (s, 1H), 8.40 (s, 1H), 6.44 (dd, *J* = 17.2, 11.2 Hz, 1H, H19), 5.74 (d, *J* = 8.4 Hz, 1H, H14), 5.28 (dd, *J* = 11.2, 1.2 Hz, 1H, H20), 5.15 (dd, *J* = 17.2, 1.2 Hz, 1H, H20), 4.13 (ABq, *J* = 16.0 Hz, 2H, H22), 3.32 (dd, *J* = 10.4, 6.4 Hz, 1H, H11), 3.18 (ABq, *J* = 16.8 Hz, 2H), 2.60 (s, 4H), 2.37 – 2.09 (m, 4H, H10, H2, H4), 2.00 (dd, *J* = 16.0, 8.4 Hz, 1H, H13), 1.81 – 1.67 (m, 6H), 1.67 – 1.46 (m, 5H, H7, H1), 1.45 – 1.39 (m, 1H, H8), 1.38 (s, 3H, H18), 1.36 – 1.25 (m, 2H, H13, H6), 1.11 (s, 3H, H15), 1.10 – 1.04 (m, 1H, H8), 0.85 (d, *J* = 6.8 Hz, 3H, H17), 0.71 (d, *J* = 6.8 Hz, 3H, H16); <sup>13</sup>C NMR (101 MHz, CDCl<sub>3</sub>): δ (ppm) 217.0(C3), 169.2(C21), 167.6, 159.5, 150.7, 150.3, 144.5, 139.1(C19), 128.8, 117.3(C20), 74.7(C11), 70.1(C14), 63.2(C4), 58.2(C22), 55.1, 45.6(C9), 44.8(C13), 44.1(C12), 42.0(C5), 36.8(C6), 36.1(C10), 34.6(C2), 31.8(C8), 30.5 (C7), 27.0(C18), 26.5(C1), 26.3, 24.9, 23.8, 16.9(C16), 14.9(C15), 11.6(C17); IR (KBr, cm<sup>-1</sup>): 3440, 2931, 1725, 1635, 1573, 1508, 1380, 1261, 1116, 913; HRMS: calculated for C<sub>34</sub>H<sub>48</sub>N<sub>6</sub>O<sub>5</sub>S ([M + H]<sup>+</sup>): 653.3480; found: 653.3474.

**8b:** White powder; yield: 45.0 %; mp: 208.3-209.3 °C; <sup>1</sup>H NMR (400 MHz, CDCl<sub>3</sub>): δ (ppm) 13.49 (s, 1H), 9.84 (s, 1H), 8.40 (s, 1H), 6.42 (dd, *J* = 17.6, 11.2 Hz, 1H, H19), 5.74 (d, *J* = 8.4 Hz, 1H, H14), 5.28 (dd, *J* = 11.2, 1.2 Hz, 1H, H20), 5.15 (dd, *J* = 17.6, 1.2 Hz, 1H, H20), 4.16 (s, 2H), 3.39 (ABq, *J* = 16.8 Hz 2H, H22), 3.32 (dd, *J* = 8.4, 4.0 Hz, 1H, H11), 2.75 (s, 4H), 2.37 – 2.04 (m, 4H, H10, H2, H4), 2.00 (dd, *J* = 16.0, 8.4 Hz, 1H, H13), 1.91 (s, 4H), 1.78 – 1.41 (m, 6H, H7, H1, H8), 1.38 (s, 3H, H18), 1.36 – 1.23 (m, 2H, H13, H6), 1.12 (s, 3H, H15), 1.09 (d, *J* = 12.0 Hz, 1H, H8), 0.85 (d, *J* = 6.8 Hz, 3H, H17), 0.74 (d, *J* = 6.8 Hz, 3H, H16); <sup>13</sup>C NMR (101 MHz, CDCl<sub>3</sub>): δ (ppm) 217.0(C3), 169.2(C21), 167.6, 159.5, 150.7, 150.2, 144.4, 139.0(C19), 128.7, 117.2(C20), 74.6(C11), 70.1(C14), 60.1(C4), 58.2(C22), 54.8, 45.5(C9), 44.7(C13), 44.0(C12), 42.0(C5), 36.8(C6), 36.0(C10), 34.5(C2), 31.8, 30.5(C8), 27.0(C7), 26.6(C18), 24.9(C1), 24.2, 16.8(C16), 14.9(C15), 11.5(C17); IR (KBr, cm<sup>-1</sup>): 3435, 2926, 1727, 1572, 1506, 1379, 1261, 1115, 1019, 909, 801; HRMS: calculated for C<sub>33</sub>H<sub>46</sub>N<sub>6</sub>O<sub>5</sub>S ([M + H]<sup>+</sup>): 639.3323; found: 639.3319.

**8c:** White powder; yield: 50.1%; mp: 192.4-193.4 °C; <sup>1</sup>H NMR (400 MHz, CDCl<sub>3</sub>): δ (ppm) 13.40 (s, 1H), 9.84 (s, 1H), 8.40 (s, 1H), 6.42 (dd, *J* = 17.2, 11.2 Hz, 1H, H19), 5.73 (d, *J* = 8.4 Hz, 1H, H14), 5.27 (dd, *J* = 11.2, 1.2 Hz, 1H, H20), 5.15 (dd, *J* = 17.2, 1.2 Hz, 1H, H20), 4.13 (ABq, *J* = 16.8 Hz, 2H, H22), 3.85 (t, *J* = 4.4 Hz, 4H), 3.32 (dd, *J* = 10.4, 6.4 Hz, 1H, H11), 3.25 (ABq, *J* = 16.8 Hz, 2H), 2.69 (t, *J* = 4.4 Hz, 4H), 2.35 – 2.04 (m, 4H, H2, H10, H4), 1.99 (dd, *J* = 16.0, 8.4 Hz, 1H, H13), 1.77 (s, 1H), 1.76 – 1.40 (m, 5H, H7, H1, H8), 1.38 (s, 3H, H18), 1.36 – 1.23 (m, 2H, H13, H6), 1.11 (s, 3H, H15), 1.07 (dd, *J* = 14.0, 4.2 Hz, 1H, H8), 0.85 (d, *J* = 6.8 Hz, 3H, H17), 0.70 (d,

$J = 6.8$  Hz, 3H, H16);  $^{13}\text{C}$  NMR (101 MHz,  $\text{CDCl}_3$ ):  $\delta$  (ppm) 216.9, (C3) 168.1, 167.5(C21), 159.7, 150.5, 150.2, 144.6, 139.1(C19), 128.9, 117.3(C20), 74.7(C11), 70.1(C14), 67.1, 62.8(C4), 58.2(C22), 53.9, 45.5(C9), 44.8(C13), 44.1(C12), 42.0(C5), 36.8(C6), 36.1(C10), 34.5(C2), 31.9, 30.5(C8), 27.0(C7), 26.5(C18), 24.9(C1), 16.9(C16), 14.9(C15), 11.6(C17); IR (KBr,  $\text{cm}^{-1}$ ): 3435, 2930, 2860, 1727, 1573, 1484, 1428, 1378, 1257, 1116, 1015, 914, 638; HRMS: calculated for  $\text{C}_{33}\text{H}_{46}\text{N}_6\text{O}_6\text{S}$  ( $[\text{M} + \text{H}]^+$ ): 655.3272; found: 655.3257.

**8d**: White powder; yield: 44.5%; mp: 144.6-145.7°C;  $^1\text{H}$  NMR (400 MHz,  $\text{CDCl}_3$ ):  $\delta$  (ppm) 13.43 (s, 1H), 10.12 (s, 1H), 8.38 (s, 1H), 6.45 (dd,  $J = 17.2, 11.2$  Hz, 1H, H19), 5.73 (d,  $J = 8.4$  Hz, 1H, H14), 5.28 (dd,  $J = 10.8, 0.8$  Hz, 1H, H20), 5.16 (dd,  $J = 17.2, 0.8$  Hz, 1H, H20), 4.13 (s, 2H), 4.02 (d,  $J = 11.6$  Hz, 2H, H22), 3.53 (s, 2H), 3.42 (t,  $J = 11.6$  Hz, 2H), 3.32 (dd,  $J = 10.4, 6.4$  Hz, 1H, H11), 2.83 – 2.70 (m, 1H), 2.35 – 2.03 (m, 4H, H10, H2, H4), 2.03 – 1.97 (m, 1H, H13), 1.94 (d,  $J = 15.2$  Hz, 2H), 1.74 (d,  $J = 12.0$  Hz, 2H), 1.64 (d,  $J = 13.2$  Hz, 1H), 1.59 – 1.41 (m, 5H, H7, H1, H8), 1.38 (s, 3H, H18), 1.33 (d,  $J = 17.2$  Hz, 1H, H13), 1.27 (d,  $J = 16.4$  Hz, 1H, H6), 1.16 – 1.06 (m, 4H, H15, H8), 0.85 (d,  $J = 6.8$  Hz, 3H, H17), 0.72 (d,  $J = 6.8$  Hz, 3H, H16);  $^{13}\text{C}$  NMR (101 MHz,  $\text{CDCl}_3$ ):  $\delta$  (ppm) 217.1(C3), 167.6(C21), 159.6, 150.6, 150.2, 144.5, 139.2(C19), 128.8, 117.3(C20), 74.7(C11), 70.1(C14), 66.9, 58.2(C4), 55.1(C22), 50.5(C9), 45.5(C13), 44.7(C12), 44.0(C5), 42.0, 36.8(C6), 36.0(C10), 34.6, 34.0(C2), 31.8(C8), 30.5(C7), 27.0(C18), 26.5, 24.9(C1), 17.0(C16), 15.0(C15), 11.6(C17); IR (KBr,  $\text{cm}^{-1}$ ): 3431, 2928, 1726, 1575, 1502, 1378, 1283, 1180, 1116, 1077, 914, 795; HRMS: calculated for  $\text{C}_{34}\text{H}_{48}\text{N}_6\text{O}_6\text{S}$  ( $[\text{M} + \text{Na}]^+$ ): 691.3248; found: 691.3214.



**8e:** White powder; yield: 45.9%; mp: 241.4-242.9 °C; <sup>1</sup>H NMR (400 MHz, DMSO-*d*<sub>6</sub>): δ (ppm) 9.66 (s, 1H), 8.04 (s, 1H), 6.06 (dd, *J* = 17.6, 11.2 Hz, 1H, H19), 5.51 (d, *J* = 8.4 Hz, 1H, H14), 5.02 (dd, *J* = 17.6, 1.6 Hz, 1H, H20), 4.93 (dd, *J* = 11.2, 1.6 Hz, 1H, H20), 4.48 (s, 1H), 4.23 (ABq, *J* = 16.0 Hz, 2H, H22), 3.40 (s, 1H, H11), 3.09 (s, 2H), 2.76 (t, *J* = 4.4 Hz, 4H), 2.45 (t, *J* = 4.4 Hz, 4H), 2.35 (s, 1H, H4), 2.26 – 1.88 (m, 5H, H10, H2, H13), 1.68 – 1.52 (m, 2H, H7), 1.50 – 1.30 (m, 3H, H1, H8), 1.28 (s, 3H, H18), 1.24 – 1.17 (m, 2H, H13, H6), 1.01 (s, 3H, H15), 0.99 – 0.93 (m, 1H, H8), 0.80 (d, *J* = 6.8 Hz, 3H, H17), 0.59 (d, *J* = 6.8 Hz, 3H, H16); <sup>13</sup>C NMR (101 MHz, DMSO-*d*<sub>6</sub>): δ (ppm) 217.6(C3), 168.0(C21), 141.2(C19), 115.7(C20), 73.1(C11), 70.3(C14), 63.0, 57.7(C4), 54.6, 46.1, 45.4(C22), 44.6(C9), 43.9(C13), 42.0(C12), 36.9(C5), 36.8(C6), 34.5(C10), 31.4(C2), 30.6(C8), 29.2(C7), 27.2(C18), 27.1, 27.0, 24.9(C1), 24.8, 16.5(C16), 14.9(C15), 12.0(C17); IR (KBr, cm<sup>-1</sup>): 3408, 2936, 2476, 1725, 1576, 1377, 1283, 1118, 1018, 914, 638; HRMS: calculated for C<sub>33</sub>H<sub>47</sub>N<sub>7</sub>O<sub>5</sub>S ([M + H]<sup>+</sup>): 654.3432; found: 654.3430.

**8f:** White powder; yield: 45.5%; mp: 175.9-176.3 °C; <sup>1</sup>H NMR (400 MHz, DMSO-*d*<sub>6</sub>) δ 9.95 (s, 1H), 8.33 (s, 1H), 6.06 (dd, *J* = 17.6, 11.2 Hz, 1H, H19), 5.52 (d, *J* = 8.4 Hz, 1H, H14), 5.00 (dd, *J* = 17.6, 1.6 Hz, 1H, H20), 4.92 (dd, *J* = 11.2, 1.6 Hz, 1H, H20), 4.52 (d, *J* = 6.0 Hz, 1H), 4.24 (ABq, *J* = 16.4 Hz, 2H, H22), 3.40 (s, 1H, H11), 3.18 (s, 2H), 2.56 (s, 4H), 2.43 (s, 4H), 2.37 (s, 1H, H4), 2.21 (s, 3H), 2.19 – 1.93 (m, 4H, H10, H2, H13), 1.68 – 1.31 (m, 5H, H7, H1, H8), 1.28 (s, 3H, H18), 1.26 – 1.22 (m, 2H, H13, H6), 1.01 (s, 3H, H15), 0.96 (dd, *J* = 15.2, 5.6 Hz, 1H, H8), 0.80 (d, *J* = 6.8 Hz, 3H, H17), 0.57 (d, *J* = 6.8 Hz, 3H, H16); <sup>13</sup>C NMR (101 MHz, DMSO-*d*<sub>6</sub>): δ

(ppm) 217.6(C3), 167.5(C21), 151.6, 141.2(C19), 115.6(C20), 73.0(C11), 70.6(C14), 62.0, 57.7(C4), 55.1, 52.9, 45.4(C22), 44.6(C9), 43.9(C13), 42.0(C12), 36.9(C5), 36.8(C6), 34.5(C10), 31.6(C2), 30.7(C8), 29.1(C7), 27.6(C18), 24.9(C1), 16.5(C16), 14.9(C15), 12.0(C17); IR (KBr, cm<sup>-1</sup>): 3434, 2935, 1726, 1574, 1485, 1376, 1284, 1261, 1148, 1117, 1014, 912, 793; HRMS: calculated for C<sub>34</sub>H<sub>49</sub>N<sub>7</sub>O<sub>5</sub>S ([M + Na]<sup>+</sup>): 690.3408; found: 690.3375.

**8g**: White powder; yield: 39.8%; mp: 164.9-165.9 °C; <sup>1</sup>H NMR (400 MHz, DMSO-*d*<sub>6</sub>): δ (ppm) 9.51 (s, 1H), 7.89 (s, 1H), 7.07 (d, *J* = 2.4 Hz, 1H), 6.07 (dd, *J* = 17.6, 11.2 Hz, 1H, H19), 5.51 (d, *J* = 8.4 Hz, 1H, H14), 5.02 (dd, *J* = 17.6, 1.6 Hz, 1H, H20), 4.93 (dd, *J* = 11.2, 1.6 Hz, 1H, H20), 4.47 (s, 1H), 4.31 – 4.11 (m, 2H, H22), 3.40 (s, 1H, H11), 3.09 (s, 2H), 2.80 – 2.72 (m, 2H), 2.35 (s, 1H, H4), 2.32 – 1.91 (m, 7H, H10, H2, H13), 1.71 – 1.60 (m, 2H, H7), 1.59 – 1.29 (m, 7H, H1, H8), 1.28 (s, 3H, H18), 1.25 (d, *J* = 8.8 Hz, 2H, H13, H6), 1.01 (s, 3H, H15), 0.97 (dd, *J* = 13.6, 4.0 Hz, 1H, H8), 0.80 (d, *J* = 6.8 Hz, 3H, H17), 0.60 (d, *J* = 6.8 Hz, 3H, H16); <sup>13</sup>C NMR (101 MHz, DMSO-*d*<sub>6</sub>): δ (ppm) 217.5(C3), 167.9, 167.5(C21), 151.6, 141.2(C19), 115.6(C20), 73.1(C11), 70.6(C14), 62.3, 57.7(C4), 51.4, 45.4(C22), 44.6(C9), 43.8(C13), 42.0(C12), 36.9(C5), 36.8(C6), 34.7, 34.5(C10), 31.5(C2), 30.6(C8), 29.1(C7), 27.0(C18), 24.9(C1), 16.8(C16), 14.8(C15), 11.9(C17); IR (KBr, cm<sup>-1</sup>): 3424, 2929, 1726, 1572, 1500, 1428, 1377, 1283, 1187, 1150, 1116, 912, 639; HRMS: calculated for C<sub>34</sub>H<sub>48</sub>N<sub>6</sub>O<sub>6</sub>S ([M + H]<sup>+</sup>): 669.3429; found: 669.3436.

## Safety Statement

No unexpected or unusually high safety hazards were encountered.

## 2. Biology experimental methods

### 2.1 MIC And MBC assays

MIC values were set *in vitro* using the agar dilution method<sup>[2]</sup>. *S. aureus* ATCC 25923, *MSSA* ATCC29213, *MRSA* ATCC 33591, *MRSA* ATCC 43300, *MSSR* ATCC 12228 and *MRSE* ATCC 51625 were employed for susceptibility evaluation on Mueller–Hinton (MH) broth. Testing was performed using a 96-well plate and microbroth serial dilution assay. The bacterial solution was regulated to 0.5 McFarland standard with saline and then diluted with MH broth to the approximate concentration of  $10^6\text{--}10^7$  CFU·mL<sup>-1</sup>. All test compounds, reference drugs tiamulin fumarate and retapamulin, were dissolved in DMSO with a concentration of 12800 µg·mL<sup>-1</sup>. 96 µL MH broth was mixed with 4 µL compounds solution in the first row of sterile 96-well plates, while 100 µL volume of MH broth was added to others wells. Subsequently, the solution was diluted using the double dilution method. A 100 µL volume of bacteria in MH broth was mixed in the sterile 96-well plates. The plates were incubated at 37 °C for 20–24 h. MIC was defined as the lowest concentration without apparent visible bacteria growth. To determine the MBC, aliquots of 5 µL were taken from the wells exhibiting no visible turbidity, spot plated onto the surface of a Mueller Hinton agar

(MHA) plate and further incubated for 24 h at 37 °C. The lowest test concentration of the antimicrobial that resulted in the absence of bacterial growth was reported as the MBC.

## 2.2 Time-kill kinetics assay

*MRSA* ATCC 33591 grown in MH broth was diluted to nearly  $1 \times 10^6$  CFU·mL<sup>-1</sup> and administrated with compound **6j** and tiamulin with the final concentrations of  $1 \times$  MIC,  $2 \times$  MIC,  $4 \times$  MIC. After the time intervals were specified (0, 2, 4, 6, 8, 12 and 24 h), 10  $\mu$ L aliquots were serially diluted to  $10^{-1}$  to  $10^{-3}$  in 0.9% saline. Subsequently, 25  $\mu$ L of the dilutions were plated on sterile MHA plates and incubated at 37 °C for 20 h. The time-kill curve is expressed as  $\log_{10}$  (CFU·mL<sup>-1</sup>) of bacteria counts versus time.

## 2.3 Cytotoxicity assay

Cell viability was examined through MTT assay. The cell line employed in the experiment comprised HepG2, Hela, RAW264.7 and A549. The exponentially growing cells were seeded in 96-well and 24 h later cells were administrated with **6j** at concentrations from 0 to 40  $\mu$ M at 37 °C under 5% CO<sub>2</sub> for 24 h. Next, the cells were incubated with 150  $\mu$ L per well of MTT (0.5 mg·mL<sup>-1</sup> in PBS) at 37 °C under 5% CO<sub>2</sub> for 4h. After the incubation, the MTT was removed, and then the cells were dissolved in 150  $\mu$ L DMSO for 10 min at 37 °C. The absorbance of the samples at 570 nm was examined using the microplate reader.

## 2.4 *In vivo* efficacy in the mouse model

### 2.4.1 *Thigh infection models*

All mice (ICR female mice weight of 22 to 25 g) were rendered neutropenic by intraperitoneally injection of cyclophosphamide (150 mg·kg<sup>-1</sup> for 4 days and 100 mg·kg<sup>-1</sup> for 1 day). Next, the mice received a 0.1 mL MH broth with the bacterial solution of *MRSA-33591* at a concentration of 10<sup>7</sup> CFU·mL<sup>-1</sup> via intraperitoneal injection. After 2 h, 0.9% saline, retapamulin (20, 40 mg·kg<sup>-1</sup>), tiamulin (20, 40 mg·kg<sup>-1</sup>), **6j** (20, 40 mg·kg<sup>-1</sup>) were injected respectively via the tail vein. The mice were euthanized after being treated for 24 h. The tissue of the thigh was separated, which was mixed with ice-cold saline and examined by plate counting method. The other part of the thigh was then embedded in paraffin, sectioned, and stained with hematoxylin and eosin (H&E), which was processed for light microscopy.

### 2.4.2 *Murine skin wound model*

Different amounts of **6j** (0.05, 0.10, and 0.15 g) and retapamulin (0.10 g) used in this study were made as ointments (1%, 2%, and 3% compound **6j** and 2% retapamulin, respectively) with matrix (i.e., albolene (3 g), liquid paraffin (1.5 mL), lanolin (0.1 g), and anhydrous alcohol (0.4 mL)). The mice were randomly assigned into six groups and anesthetized intraperitoneally with 10% chloral hydrate. The surgical area was exposed by shearing on the back of the mice, and the skin was disinfected with alcohol. A wound of a depth of nearly 1.5 cm was created using a

sterile scissors. The blood from the wound was cleaned with cotton ball, and an inoculum of 0.1 mL PBS (bacterial solution of *MRSA*-43300 at a concentration of  $10^{12}$  CFU·mL<sup>-1</sup>) was smeared evenly on the whole wound of mice except for the blank control group only administrated with a blank ointment matrix. After 4 h, the treatment groups were administrated with 1%, 2%, 3% compound **6j** ointment and 2% retapamulin ointment, the positive control group was administrated with a blank ointment matrix. 15 mg per mouse of ointment was applied for the respective treatment. The dosage for each group was continued for 5 days with 24 h intervals. After inoculation, the mice were caged separately and observed twice daily for their clinical signs and mortality. Wound camera records, from the day of modeling take a photo record once a day. The levels of TNF- $\alpha$ , IL-6, and MCP-1 were examined by ELISA.

### 3. Molecular docking

The binding mode of compounds **5c**, **6j** and **8a** was explored by docking using the PTC ribosome complex with Tiamulin (PDB ID: 1XBP) [3]. In particular, the PTC ribosome model was constructed using residues in 30 Å from the binding site after extraction of the original ligand tiamulin. Moreover, **5c**, **6j**, **8a** and the above ribosome model were prepared using AutoDockTools by removing water molecules, adding polar hydrogens, and assigning Gasteiger charges. Lastly, the box (52.791, 122.679, 114.289) was set using the original ligand as the grid center with box sizes (36.758, 44.448, 36.761). Docking was performed using DOCK 6[4].

#### 4. References for supporting information

- (1) Zhang, Y.; Xie, C.; Liu, Y.; Shang, F.; Shao, R.; Yu, J.; Wu, C.; Yao, X.; Liu, D.; Wang, Z. Synthesis, biological activities and docking studies of pleuromutilin derivatives with piperazinyl urea linkage. *J. Enzyme Inhib. Med. Chem.* **2021**, *36*, 764-775.
- (2) Reynolds, R.; Shackcloth, J.; Felmingham, D.; Macgowan, A.; Surveillance, B.E.W.P.O.R.R. Comparison of BSAC agar dilution and NCCLS broth microdilution MIC methods for in vitro susceptibility testing of *Streptococcus pneumoniae*, *Haemophilus influenzae* and *Moraxella catarrhalis*: the BSAC Respiratory Resistance Surveillance Programme. *J. Antimicrob. Chemother.* **2003**, *52*, 925-930.
- (3) Schlunzen, F.; Pyetan, E.; Fucini, P.; Yonath, A.; Harms, J.M. Inhibition of peptide bond formation by pleuromutilins: the structure of the 50S ribosomal subunit from *Deinococcus radiodurans* in complex with tiamulin. *Mol. Microbiol.* **2004**, *54*, 1287-1294.
- (4) Lang, P.T.; Brozell, S.R.; Mukherjee, S.; Pettersen, E.F.; Meng, E.C.; Thomas, V.; Rizzo, R.C.; Case, D.A.; James, T.L.; Kuntz, I.D. DOCK 6: combining techniques to model RNA-small molecule complexes. *RNA.* **2009**, *15*, 1219-1230.



## 5. HPLC, $^1\text{H}$ NMR, $^{13}\text{C}$ NMR and HRMS of intermediate compound **3** and **7**

**Figure S1.** HPLC,  $^1\text{H}$  NMR,  $^{13}\text{C}$  NMR and HRMS spectrum of intermediate compound **3**

HPLC spectrum of **3**

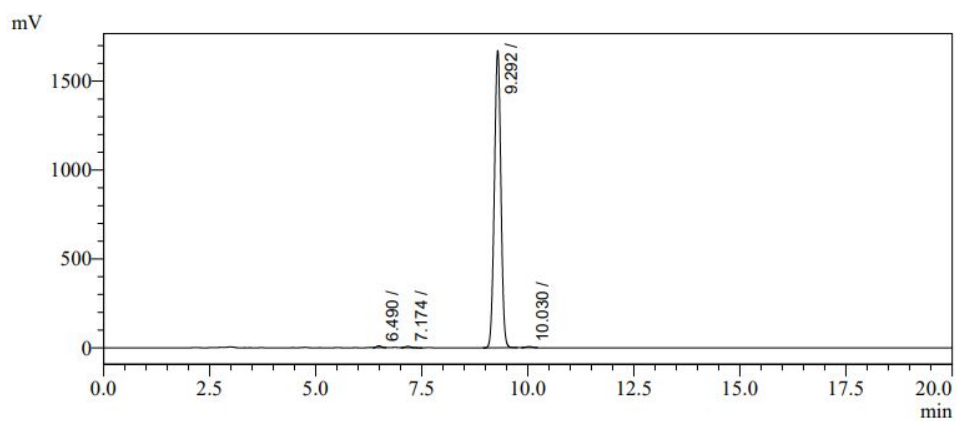

检测器A 254nm

| Peak# | Ret. Time | Height  | Area     | Area%  |
|-------|-----------|---------|----------|--------|
| 1     | 6.490     | 9416    | 68120    | 0.377  |
| 2     | 7.174     | 7578    | 68457    | 0.379  |
| 3     | 9.292     | 1670730 | 17876586 | 98.906 |
| 4     | 10.030    | 6156    | 61101    | 0.338  |

$^1\text{H}$  NMR (400 MHz,  $\text{CDCl}_3$ ) spectrum of **3**

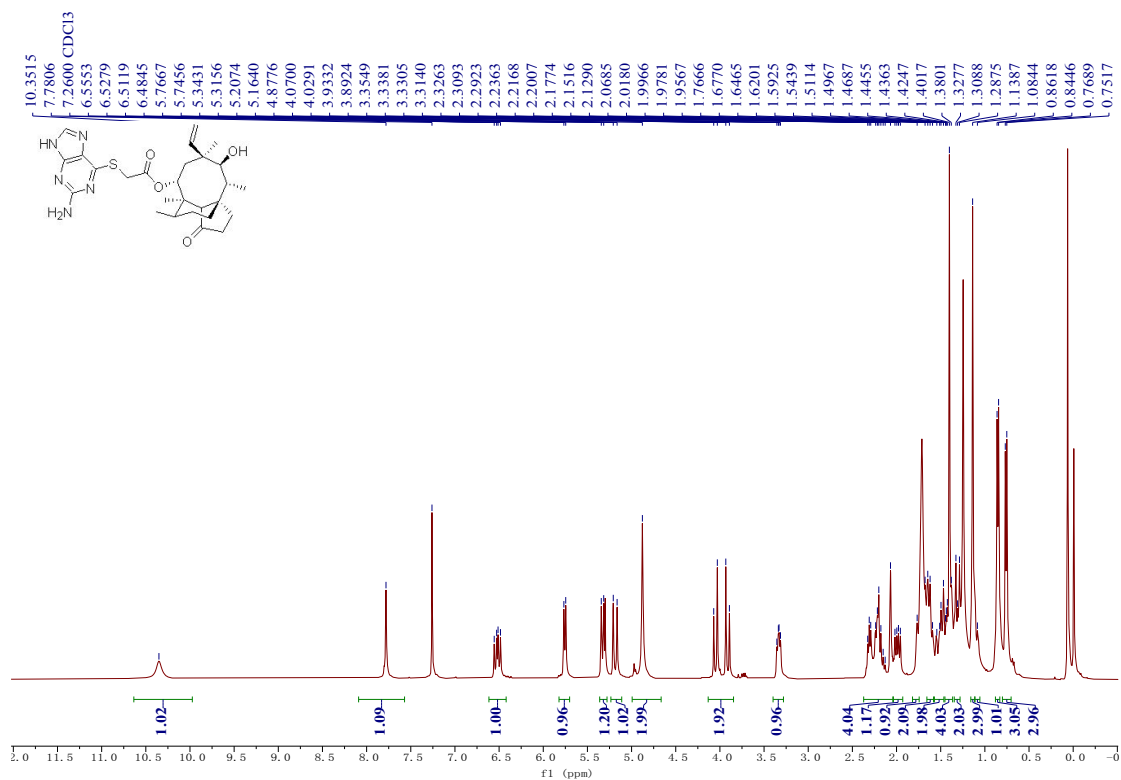

<sup>13</sup>C NMR (101 MHz, DMSO-*d*<sub>6</sub>) spectrum of **3**

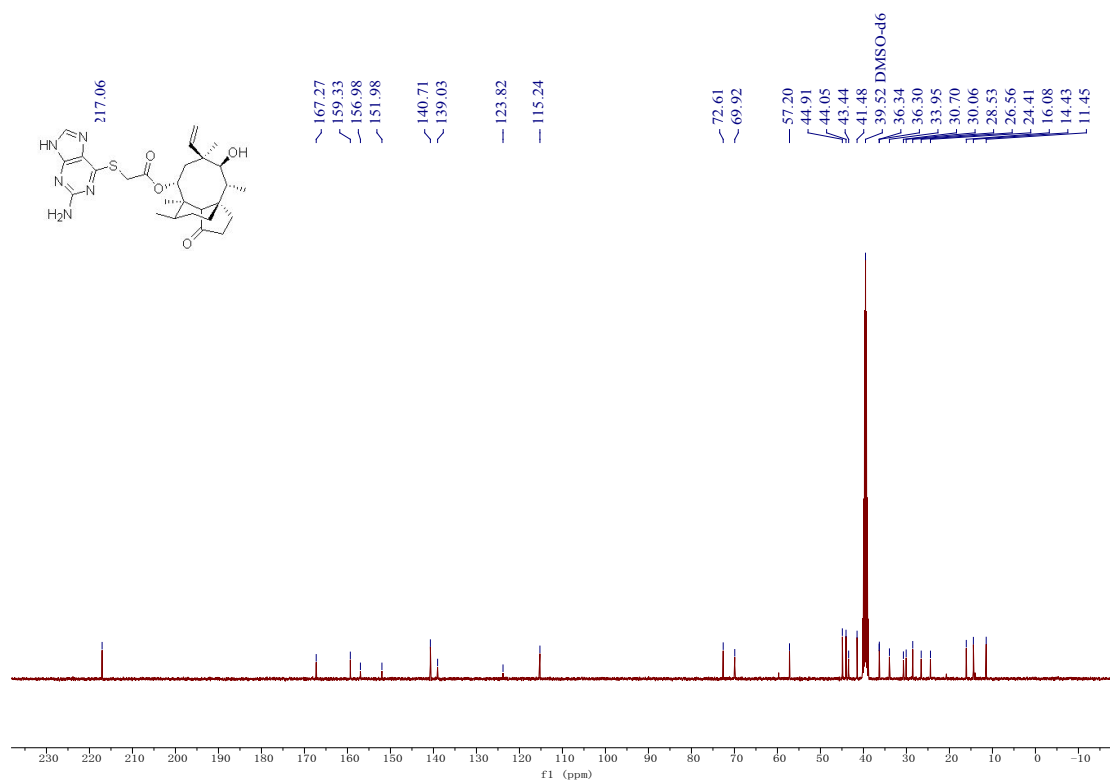

HRMS spectrum of **3**

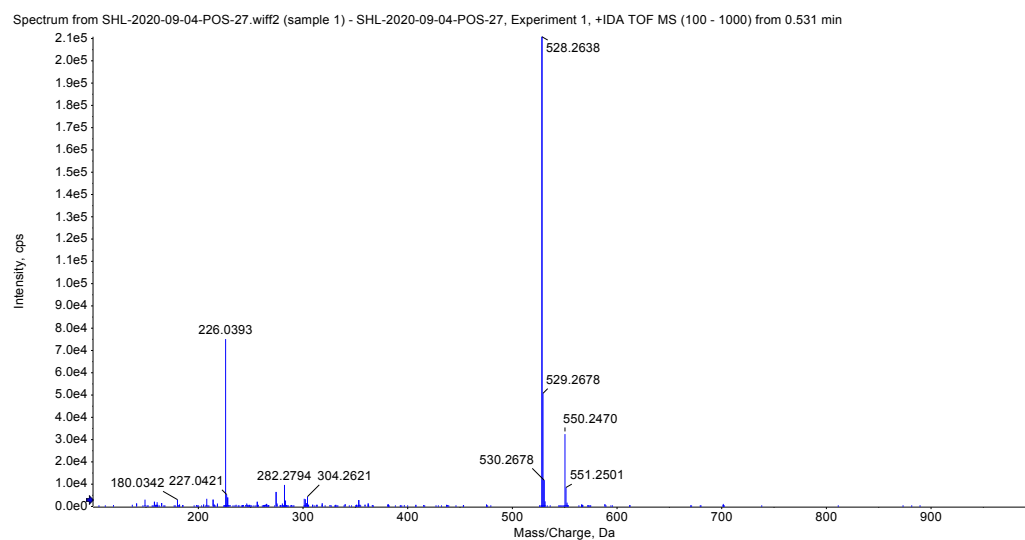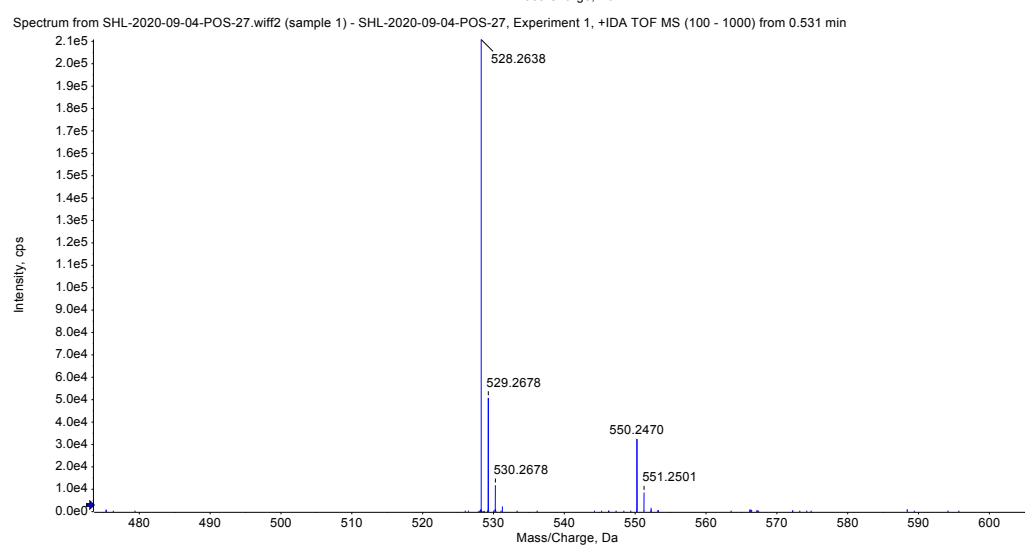

**Figure S2.** HPLC,  $^1\text{H}$  NMR,  $^{13}\text{C}$  NMR and HRMS spectrum of intermediate compound **7**  
HPLC spectrum of **7**

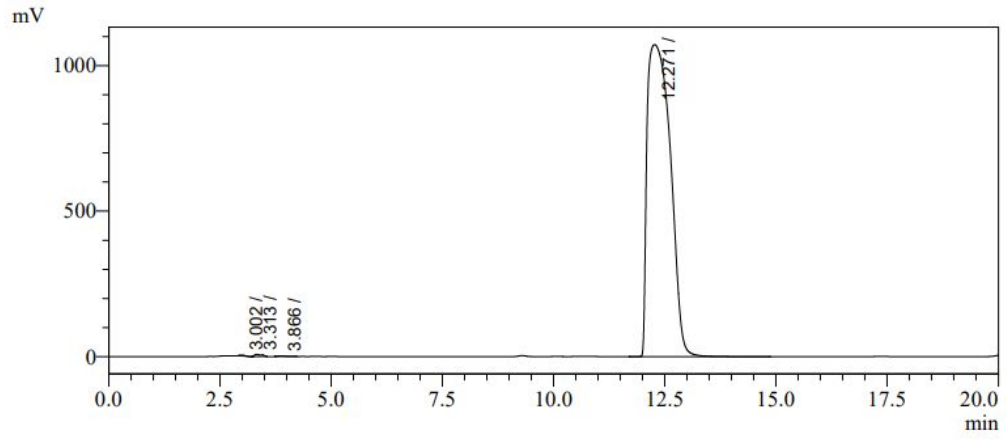

检测器A 254nm

| Peak# | Ret. Time | Height  | Area     | Area%  |
|-------|-----------|---------|----------|--------|
| 1     | 3.002     | 3415    | 25711    | 0.066  |
| 2     | 3.313     | 7825    | 91346    | 0.234  |
| 3     | 3.866     | 1838    | 22227    | 0.057  |
| 4     | 12.271    | 1071688 | 38902486 | 99.643 |

<sup>1</sup>H NMR (400 MHz, CDCl<sub>3</sub>) spectrum of 7

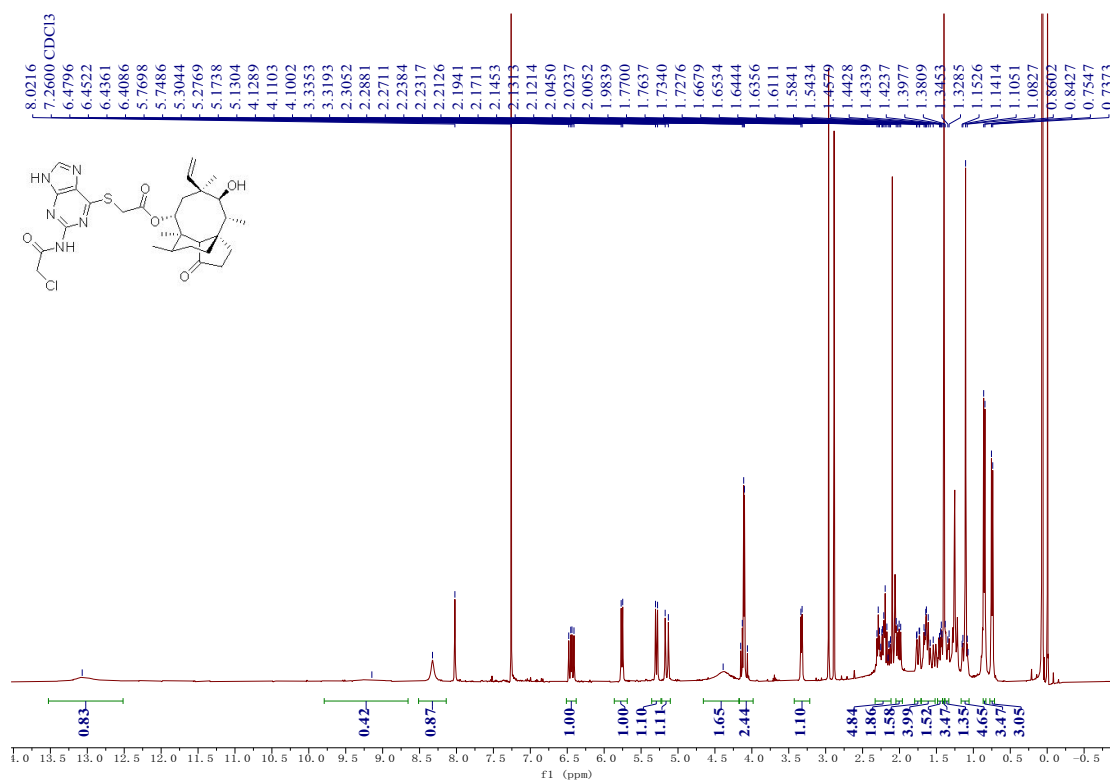

<sup>13</sup>C NMR (101 MHz, DMSO-d<sub>6</sub>) spectrum of 7

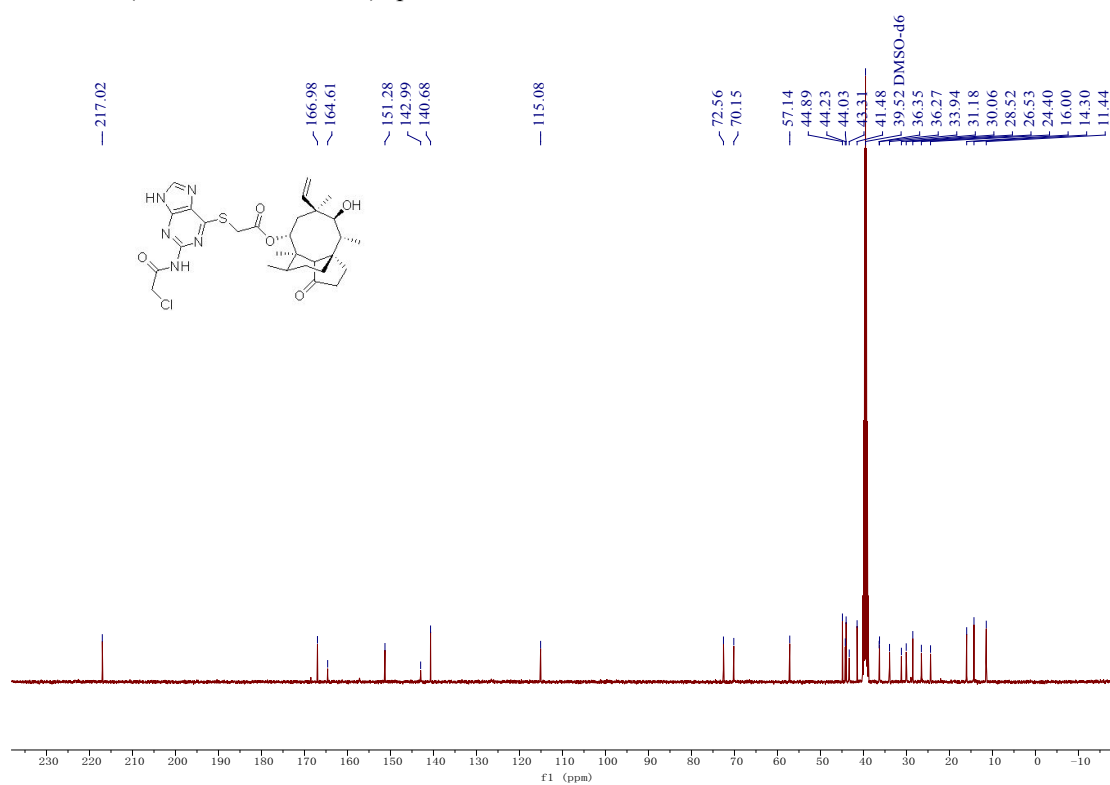

# HRMS spectrum of 7

Spectrum from SHL-2020-09-04-POS-66.wiff2 (sample 1) - SHL-2020-09-04-POS-66, Experiment 1, +IDA TOF MS (100 - 1000) from 0.467 min

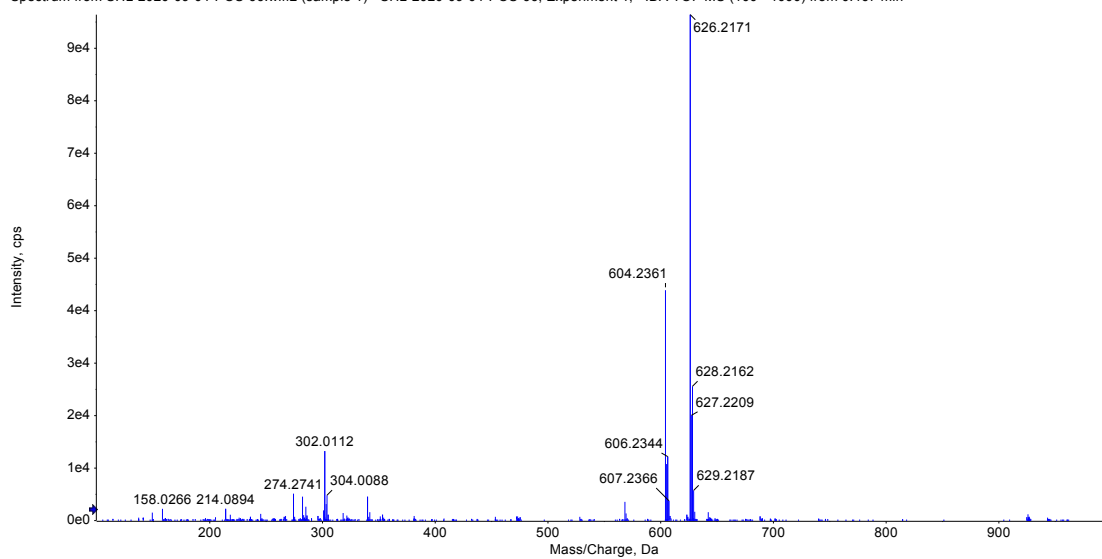

Spectrum from SHL-2020-09-04-POS-66.wiff2 (sample 1) - SHL-2020-09-04-POS-66, Experiment 1, +IDA TOF MS (100 - 1000) from 0.467 min

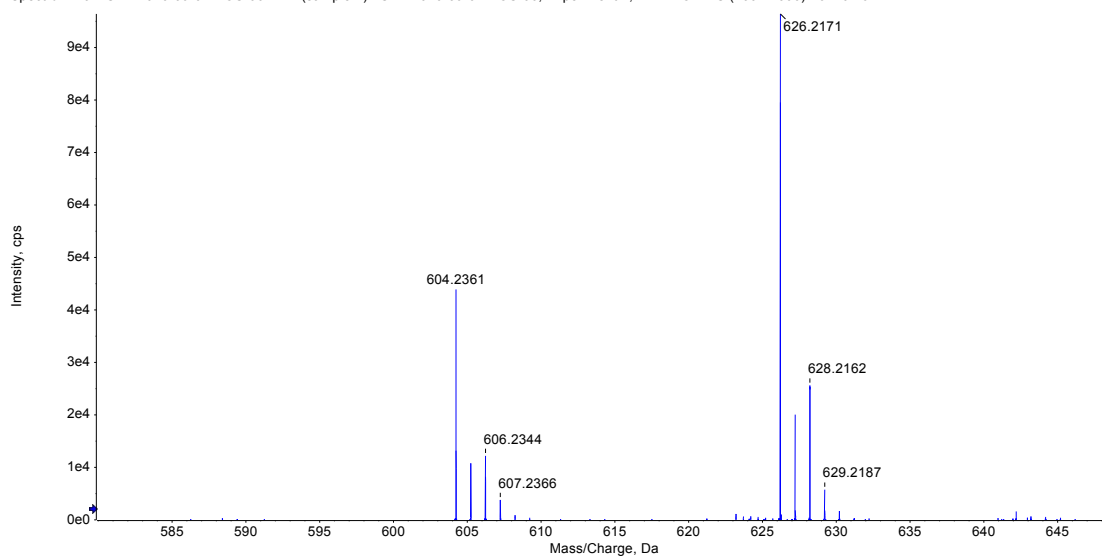

## 6. HPLC, <sup>1</sup>H NMR, <sup>13</sup>C NMR, HRMS, IR of all final compounds

**Figure S3.** HPLC, <sup>1</sup>H NMR, <sup>13</sup>C NMR, HRMS and IR spectrum of final compound **4a**

HPLC spectrum of **4a**

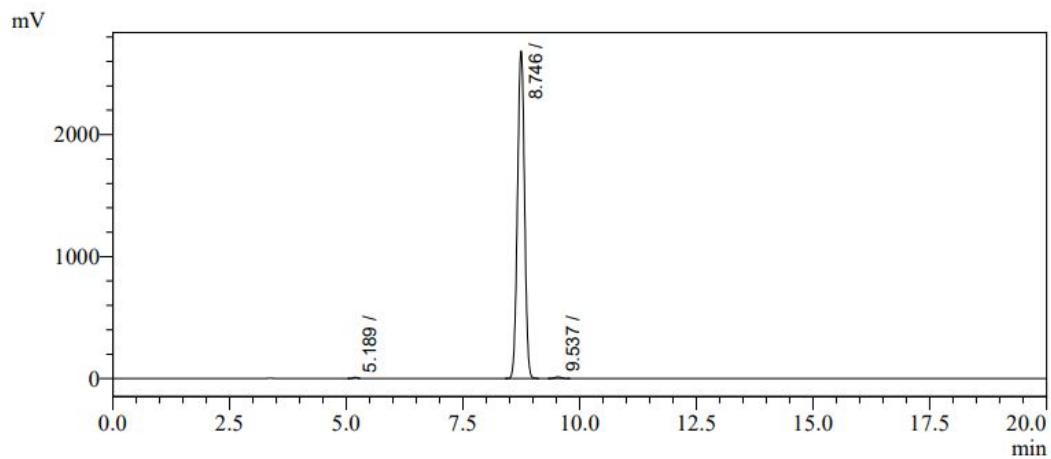

检测器A 254nm

| Peak# | Ret. Time | Height  | Area     | Area%  |
|-------|-----------|---------|----------|--------|
| 1     | 5.189     | 8960    | 47476    | 0.167  |
| 2     | 8.746     | 2684074 | 28210906 | 99.365 |
| 3     | 9.537     | 12570   | 132744   | 0.468  |

<sup>1</sup>H NMR (400 MHz, DMSO-*d*<sub>6</sub>) spectrum of **4a**

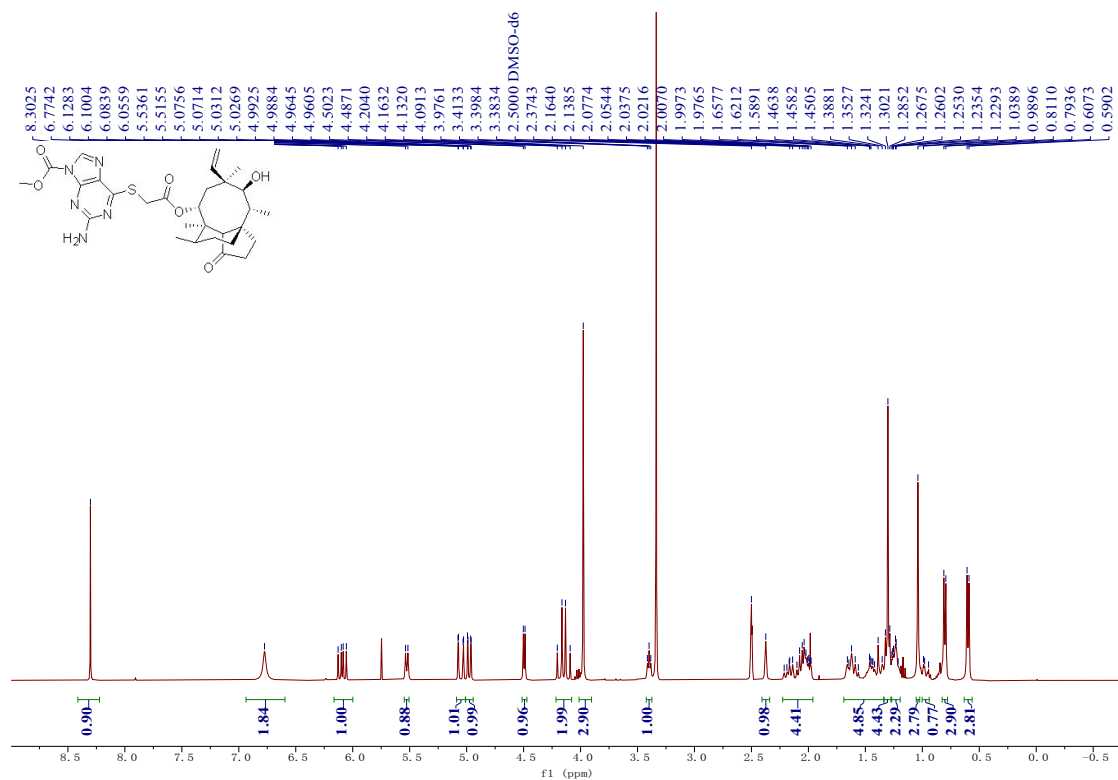

$^{13}\text{C}$  NMR (101 MHz,  $\text{DMSO-}d_6$ ) spectrum of **4a**

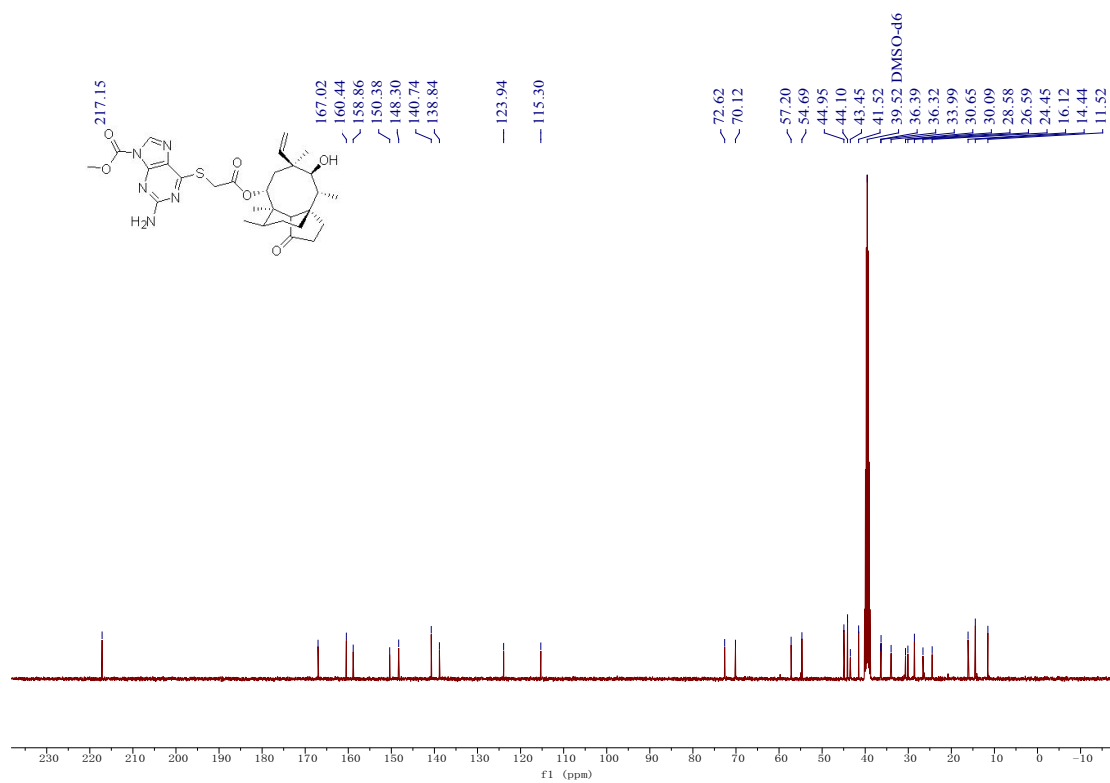

IR (KBr,  $\text{cm}^{-1}$ ) spectrum of **4a**

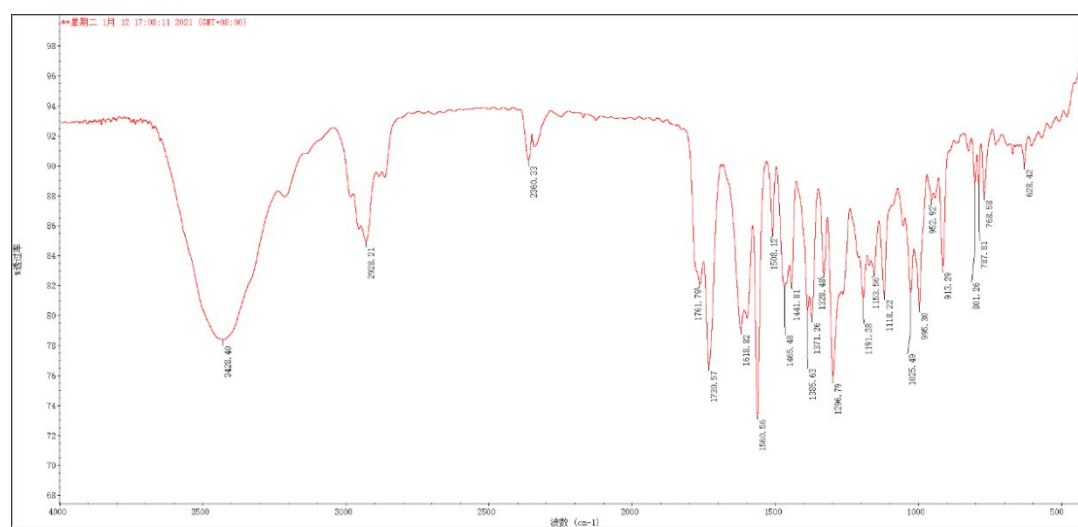



# HRMS spectrum of 4a

Spectrum from SHL-2021-02-04-POS-6.wiff2 (sample 1) - SHL-2021-02-04-POS-6, Experiment 1, +IDA TOF MS (50 - 600) from 0.015 to 0.519 min

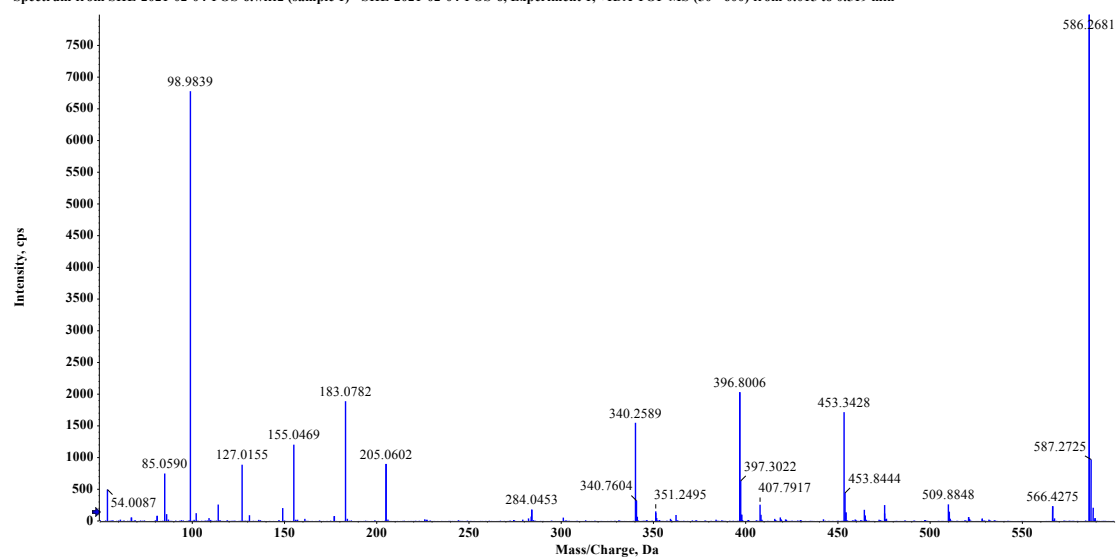

Spectrum from SHL-2021-02-04-POS-6.wiff2 (sample 1) - SHL-2021-02-04-POS-6, Experiment 1, +IDA TOF MS (50 - 600) from 0.015 to 0.519 min

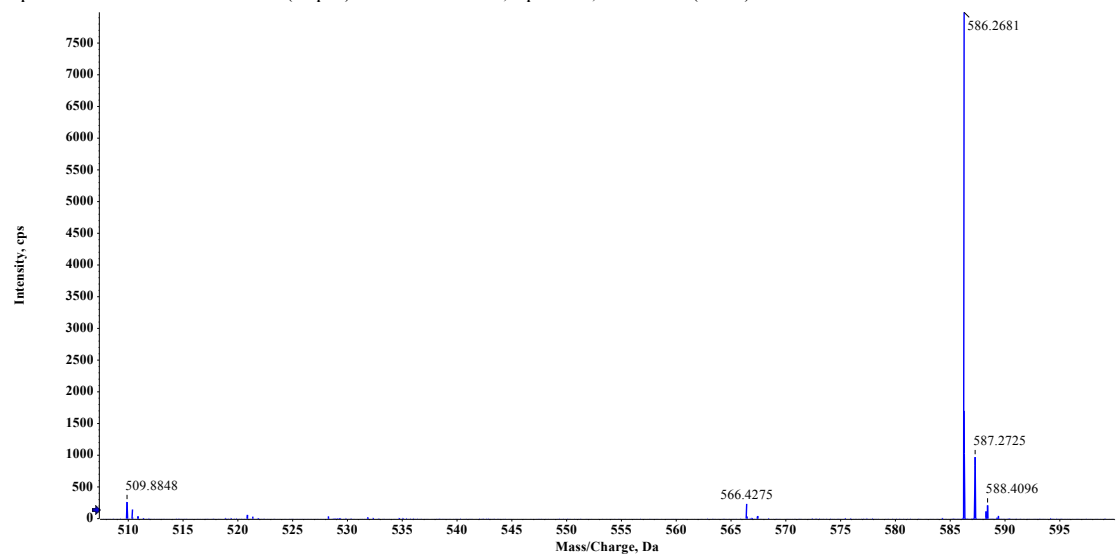

**Figure S4.** HPLC, <sup>1</sup>H NMR, <sup>13</sup>C NMR, HRMS and IR spectrum of final compound **4b**

HPLC spectrum of **4b**

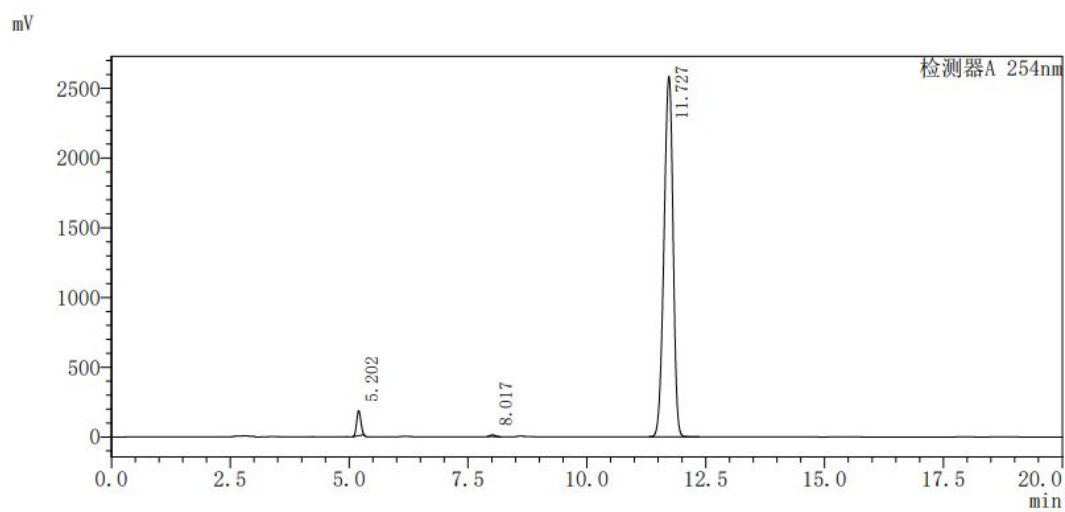

<峰表>

| 检测器A 254nm |        |         |          |         |
|------------|--------|---------|----------|---------|
| 峰号         | 保留时间   | 高度      | 面积       | 面积%     |
| 1          | 5.202  | 178402  | 1088453  | 3.068   |
| 2          | 8.017  | 10654   | 79449    | 0.224   |
| 3          | 11.727 | 2582646 | 34315418 | 96.709  |
| 总计         |        | 2771702 | 35483320 | 100.000 |

<sup>1</sup>H NMR (400 MHz, DMSO-*d*<sub>6</sub>) spectrum of **4b**

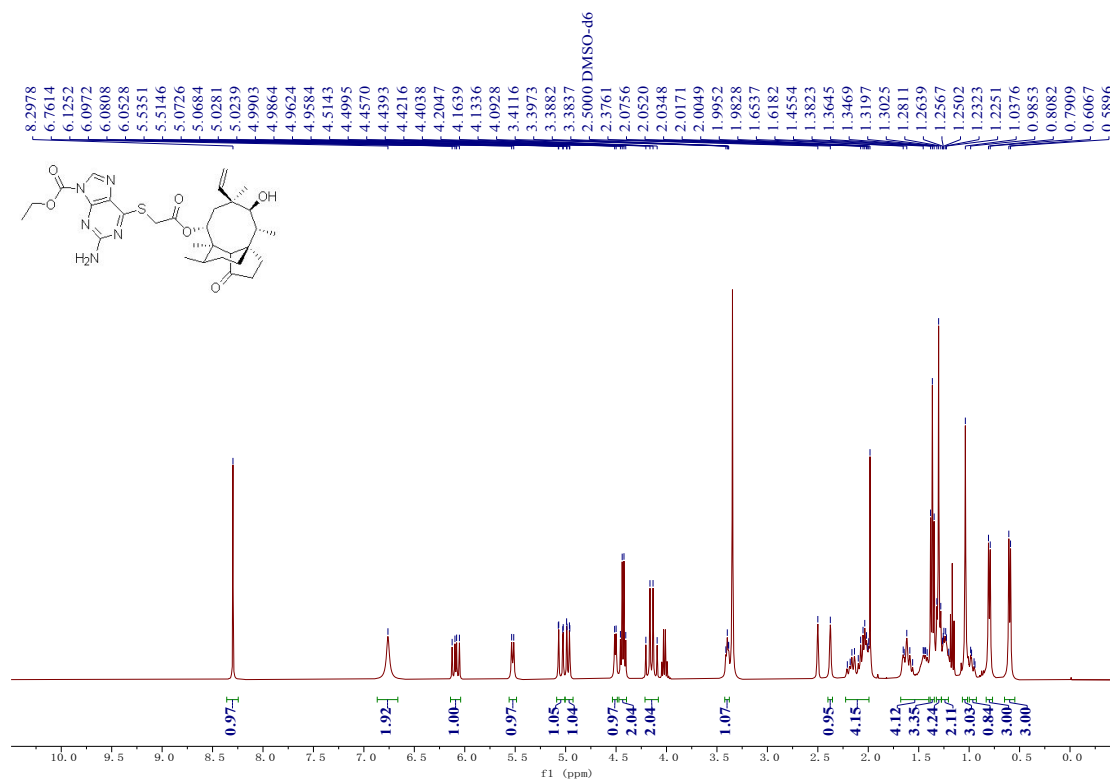

$^{13}\text{C}$  NMR (101 MHz,  $\text{DMSO-}d_6$ ) spectrum of spectrum 4b

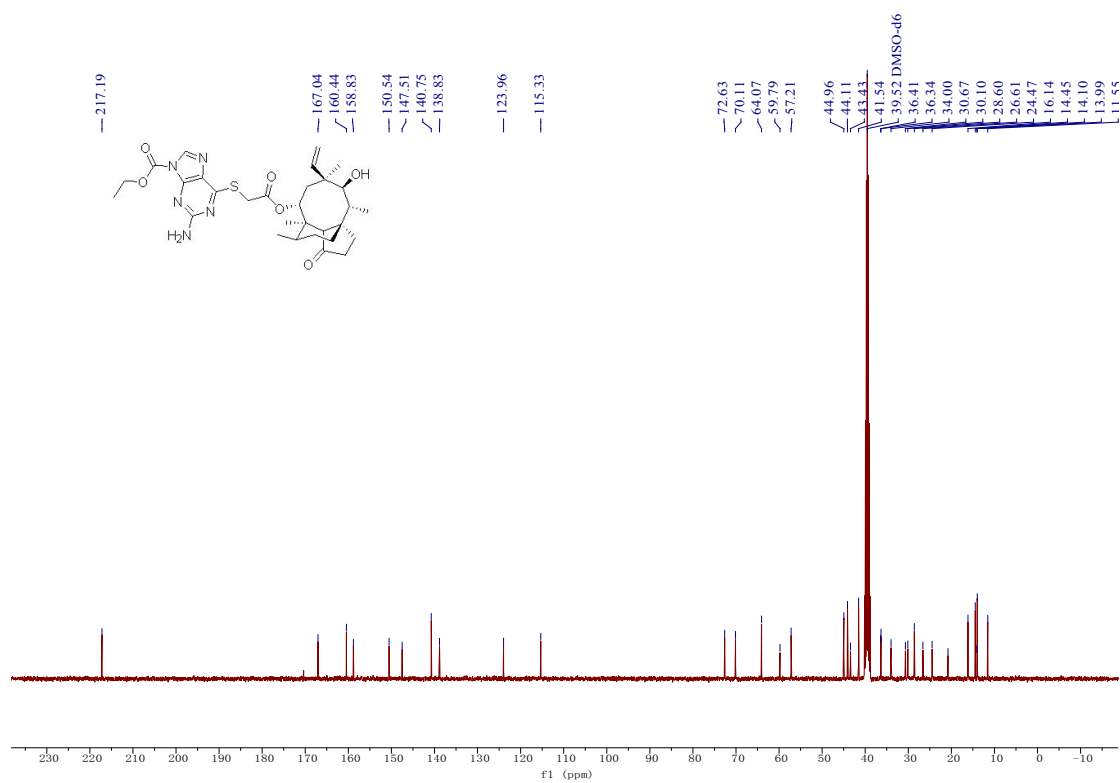

IR (KBr,  $\text{cm}^{-1}$ ) spectrum of 4b

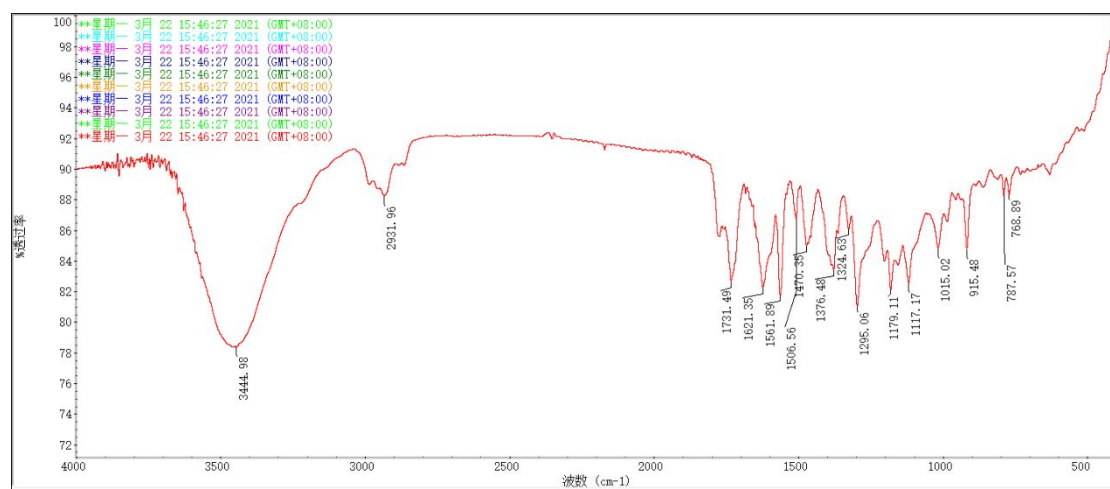

# HRMS spectrum of 4b

Spectrum from 20211117.wiff2 (sample 23) - 21, +TOF MS (400 - 800) from 0.130 to 0.138 min, subtracted by: [Spectrum from 20211117.wiff2 (sample 23) - 21, +TOF MS (400 - 800) from 1.370 to 1.928 min], centroided

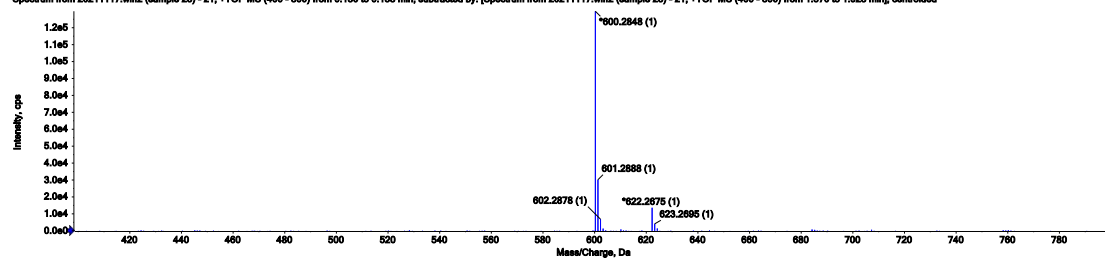

Spectrum from 20211117.wiff2 (sample 23) - 21, +TOF MS (400 - 800) from 0.130 to 0.138 min, subtracted by: [Spectrum from 20211117.wiff2 (sample 23) - 21, +TOF MS (400 - 800) from 1.370 to 1.928 min], centroided

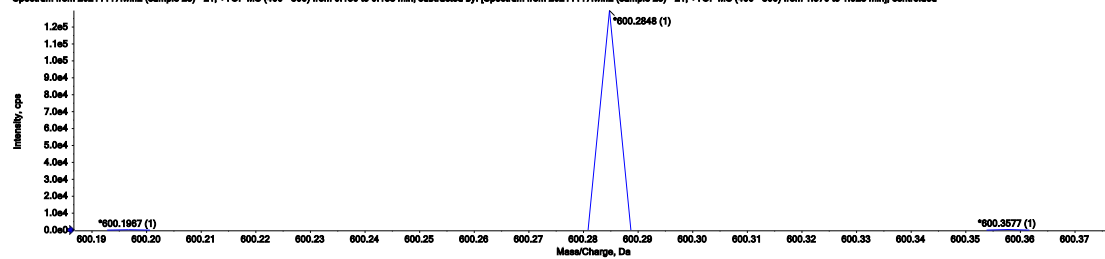

**Figure S5.** HPLC, <sup>1</sup>H NMR, <sup>13</sup>C NMR, HRMS and IR spectrum of final compound **5a**

HPLC spectrum of **5a**

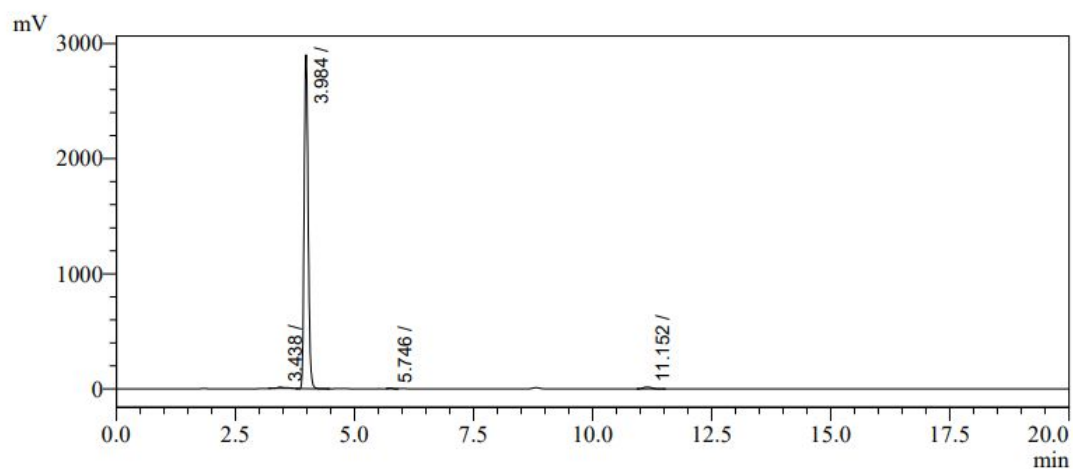

检测器A 254nm

| Peak# | Ret. Time | Height  | Area     | Area%  |
|-------|-----------|---------|----------|--------|
| 1     | 3.438     | 10302   | 112504   | 0.652  |
| 2     | 3.984     | 2900213 | 16919123 | 98.054 |
| 3     | 5.746     | 4627    | 27199    | 0.158  |
| 4     | 11.152    | 15818   | 196161   | 1.137  |

<sup>1</sup>H NMR (400 MHz, DMSO-*d*<sub>6</sub>) spectrum of **5a**

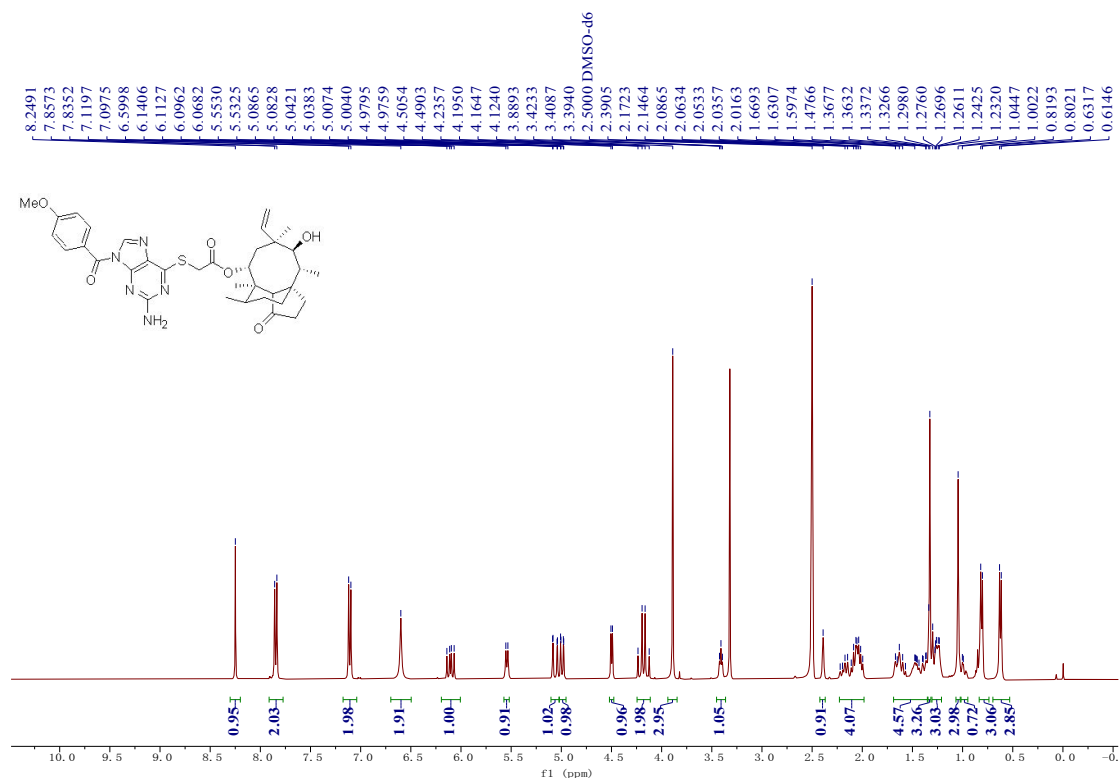

$^{13}\text{C}$  NMR (101 MHz,  $\text{DMSO-}d_6$ ) spectrum of **5a**

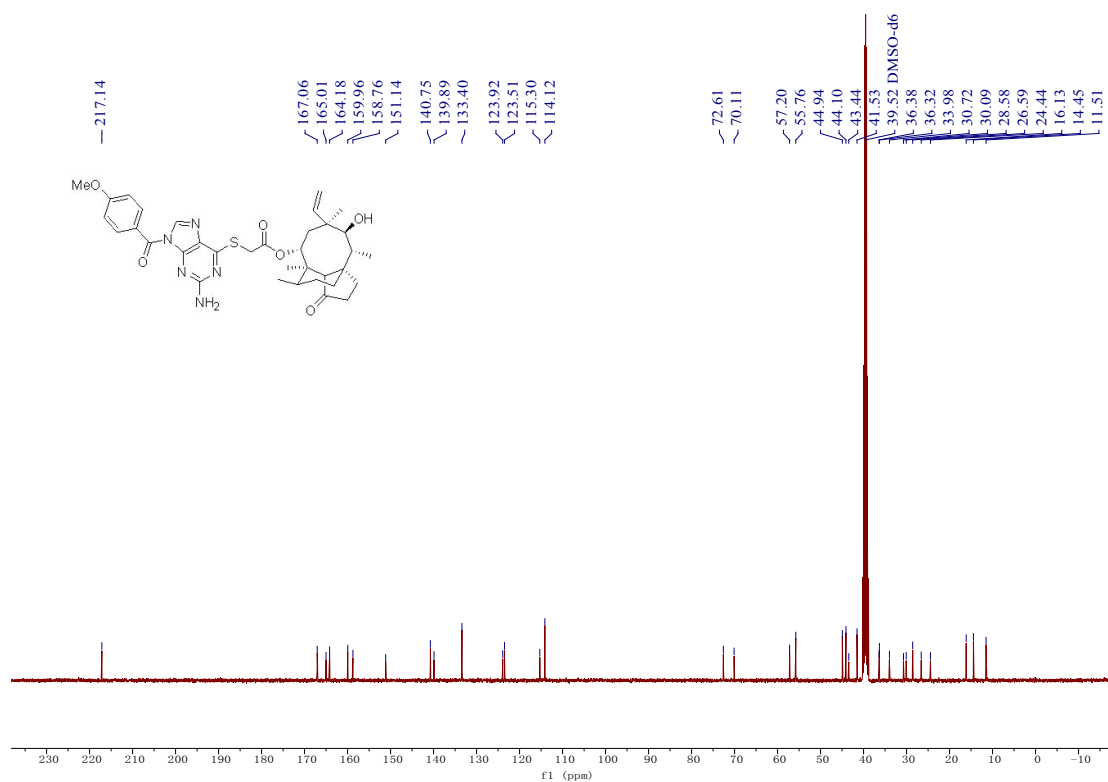

IR (KBr,  $\text{cm}^{-1}$ ) spectrum of **5a**

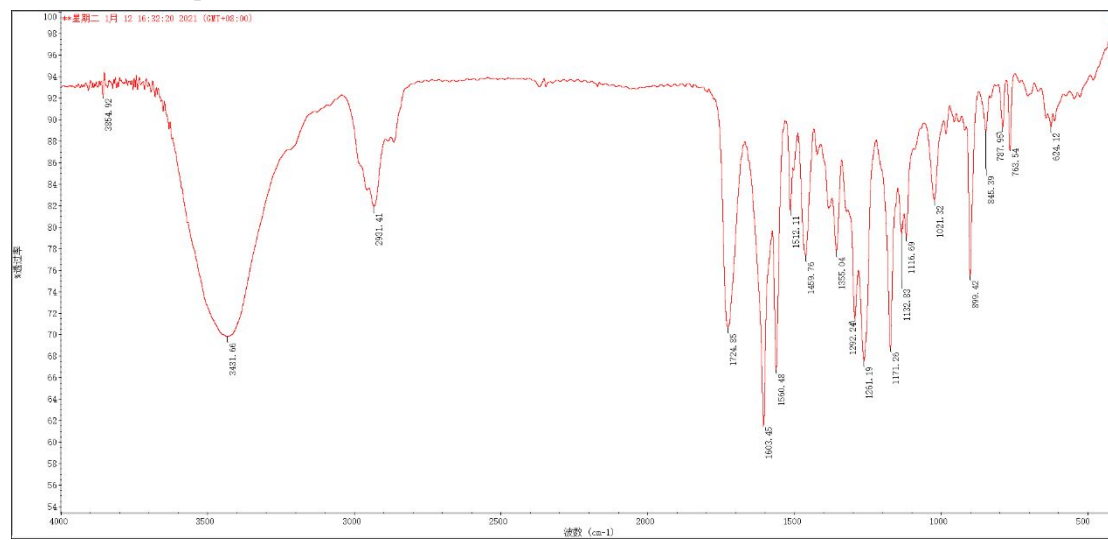

# HRMS spectrum of **5a**

Spectrum from SHL-2020-09-28-POS-61.wiff2 (sample 1) - SHL-2020-09-28-POS-61, Experiment 1, +IDA TOF MS (100 - 800) from 0.235 min

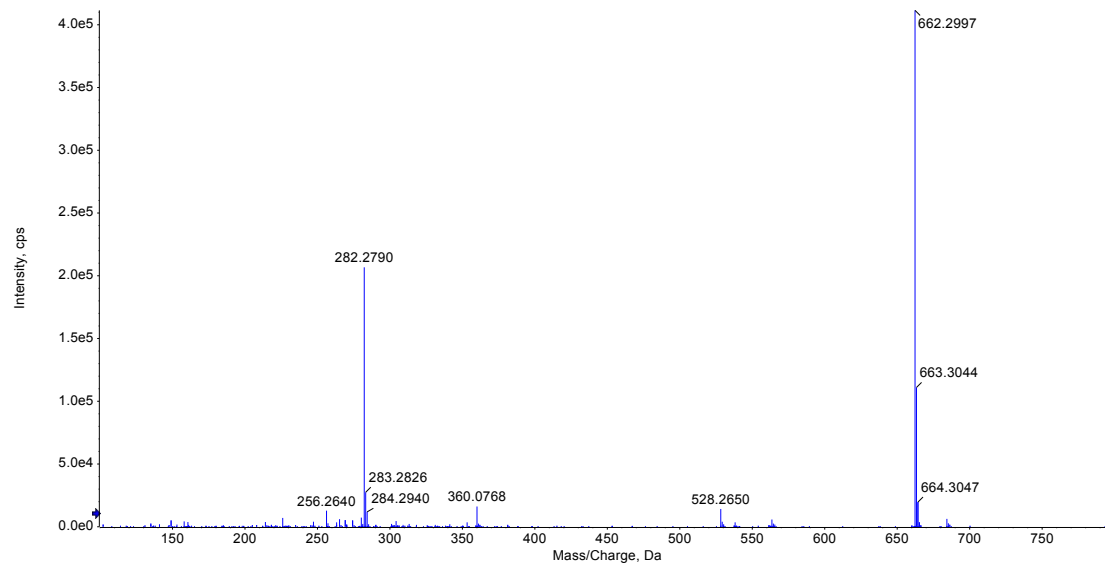

Spectrum from SHL-2020-09-28-POS-61.wiff2 (sample 1) - SHL-2020-09-28-POS-61, Experiment 1, +IDA TOF MS (100 - 800) from 0.235 min

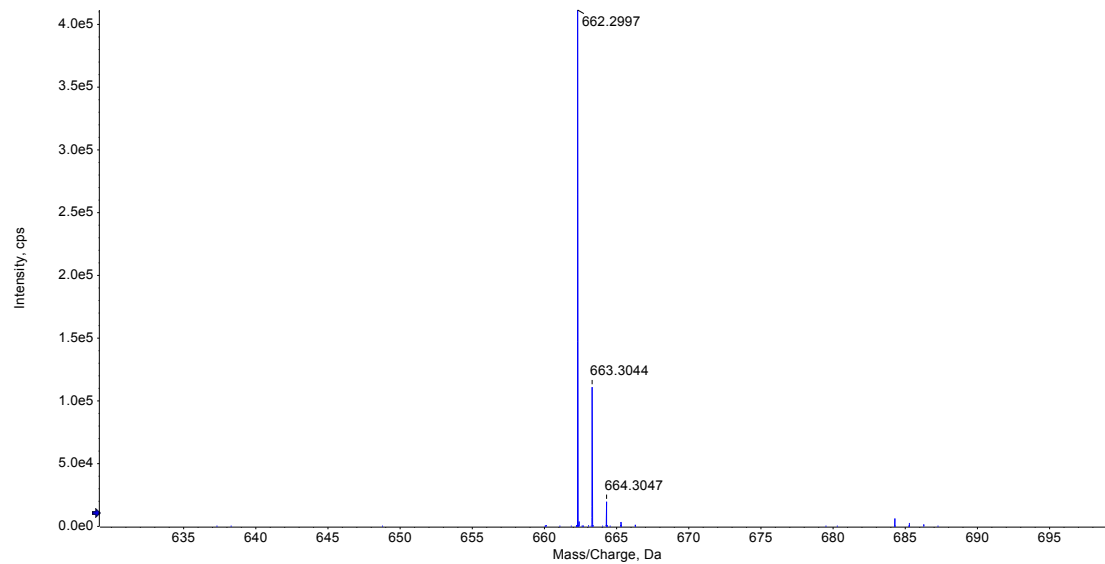

**Figure S6.** HPLC,  $^1\text{H}$  NMR,  $^{13}\text{C}$  NMR, HRMS and IR spectrum of final compound **5b**

HPLC spectrum of **5b**

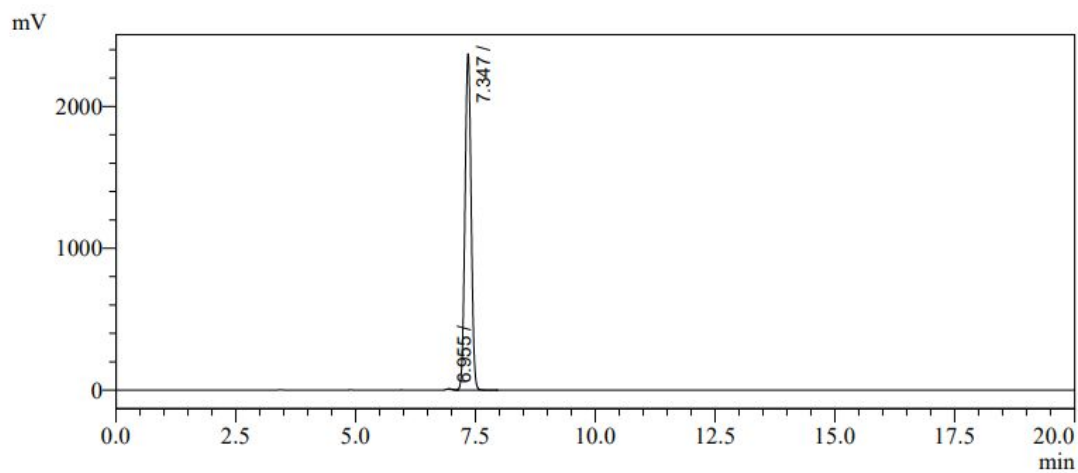

检测器A 254nm

| Peak# | Ret. Time | Height  | Area     | Area%  |
|-------|-----------|---------|----------|--------|
| 1     | 6.955     | 5662    | 30803    | 0.145  |
| 2     | 7.347     | 2369803 | 21189052 | 99.855 |

$^1\text{H}$  NMR (400 MHz,  $\text{DMSO}-d_6$ ) spectrum of **5b**

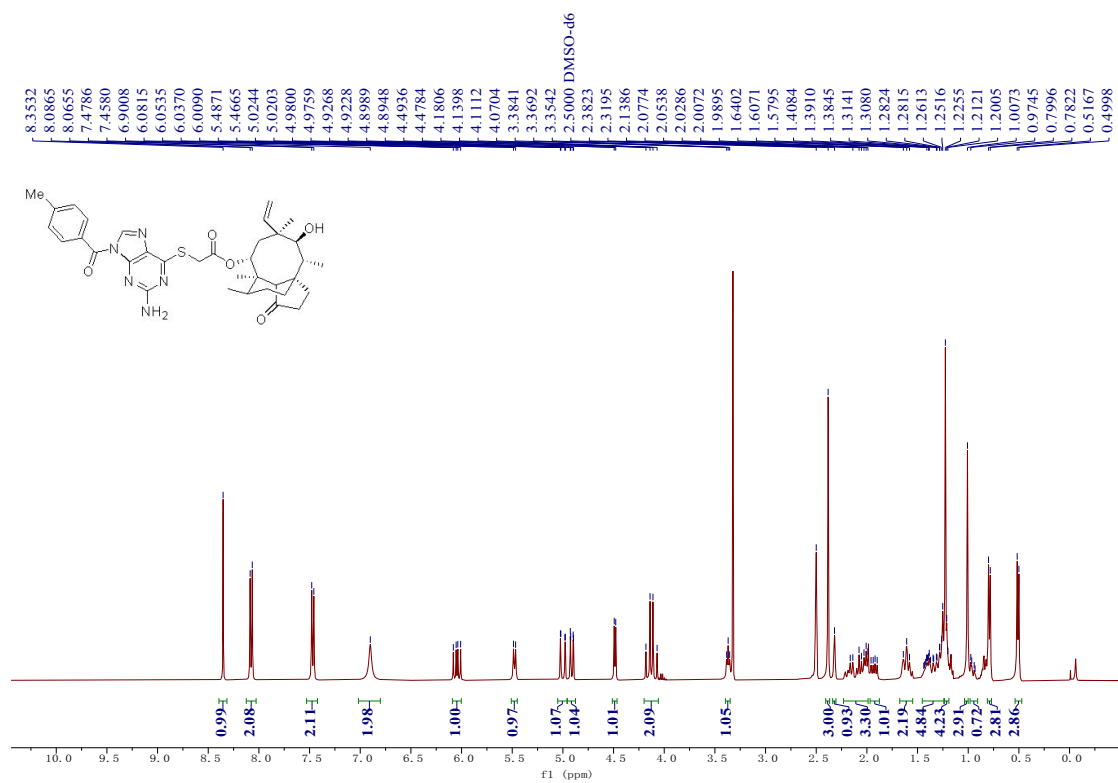



### $^{13}\text{C}$ NMR (101 MHz, $\text{DMSO-}d_6$ ) spectrum of **5b**

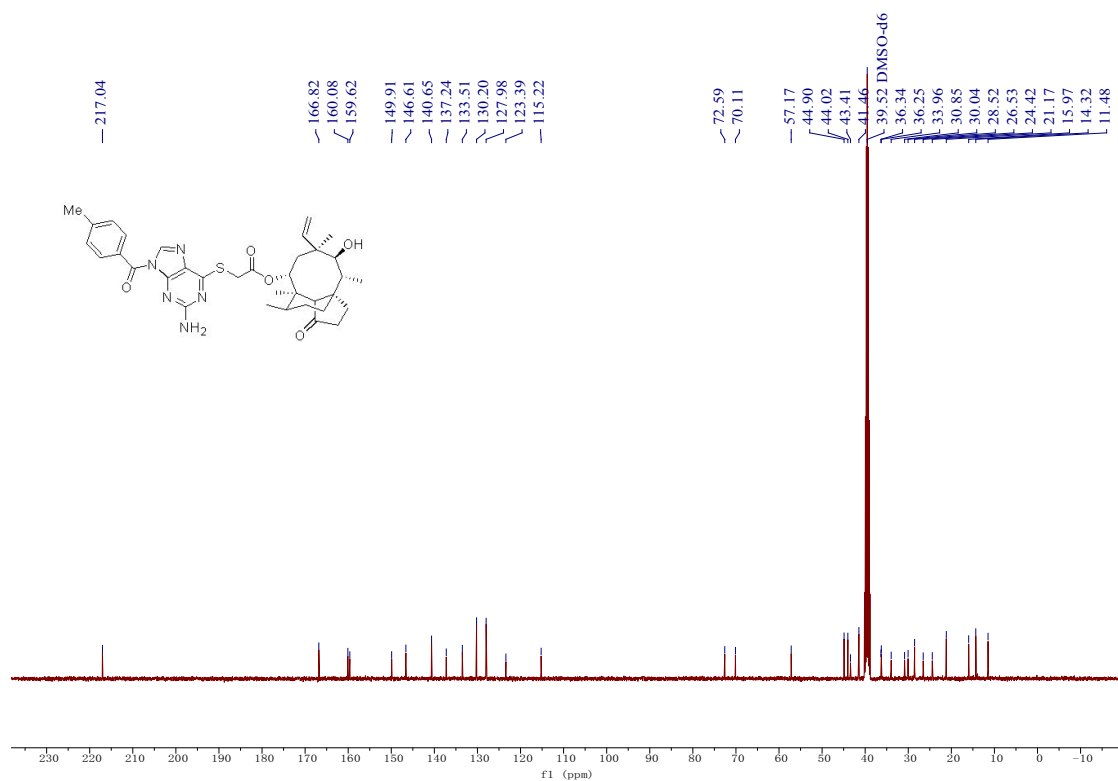

### IR (KBr, $\text{cm}^{-1}$ ) spectrum of **5b**

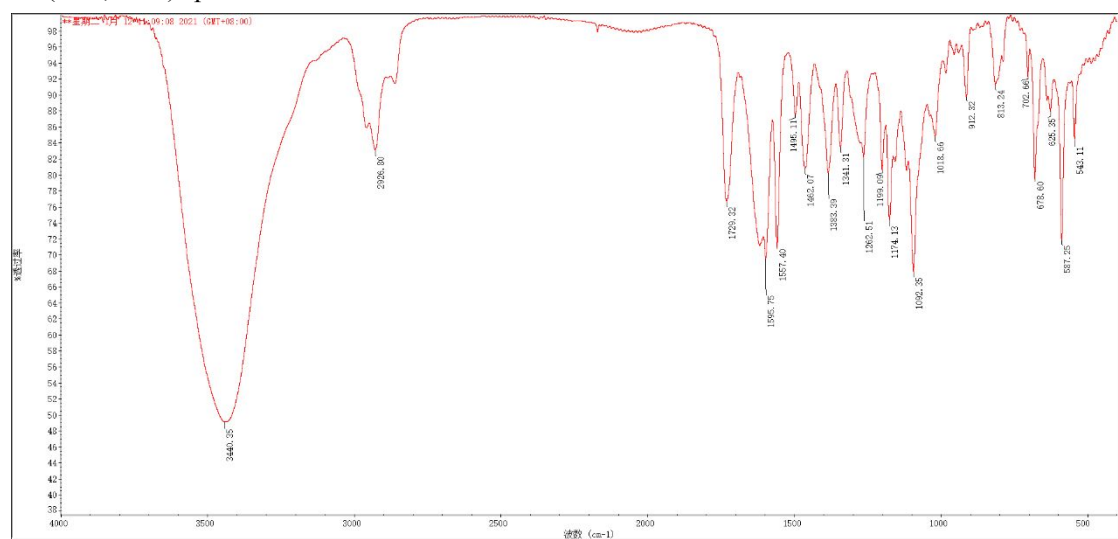

### HRMS spectrum of **5b**

Spectrum from 20211117.wf2 (sample 24) - 22, +TOF MS (400 - 800) from 0.048 to 0.096 min, subtracted by: [Spectrum from 20211117.wf2 (sample 24) - 22, +TOF MS (400 - 800) from 1.347 to 1.788 min], Recalibrated, centroided

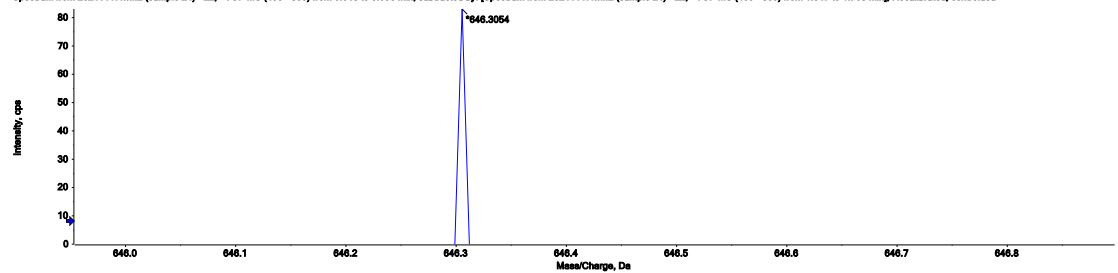

**Figure S7.** HPLC, <sup>1</sup>H NMR, <sup>13</sup>C NMR, HRMS and IR spectrum of final compound **5c**

HPLC spectrum of **5c**

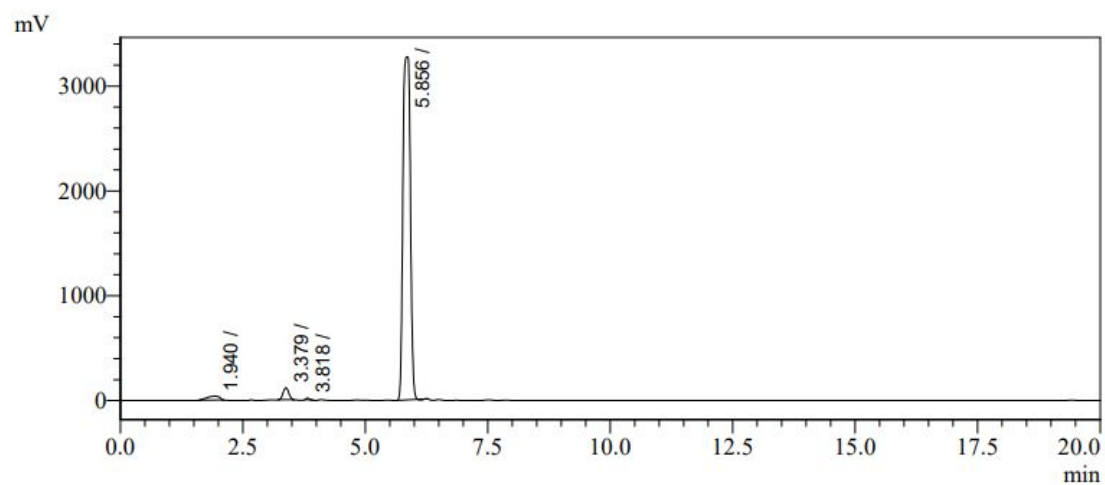

检测器A 254nm

| Peak# | Ret. Time | Height  | Area     | Area%  |
|-------|-----------|---------|----------|--------|
| 1     | 1.940     | 37808   | 645656   | 1.796  |
| 2     | 3.379     | 111928  | 892018   | 2.481  |
| 3     | 3.818     | 14032   | 54636    | 0.152  |
| 4     | 5.856     | 3274281 | 34358946 | 95.571 |

<sup>1</sup>H NMR (400 MHz, DMSO-*d*<sub>6</sub>) spectrum of **5c**

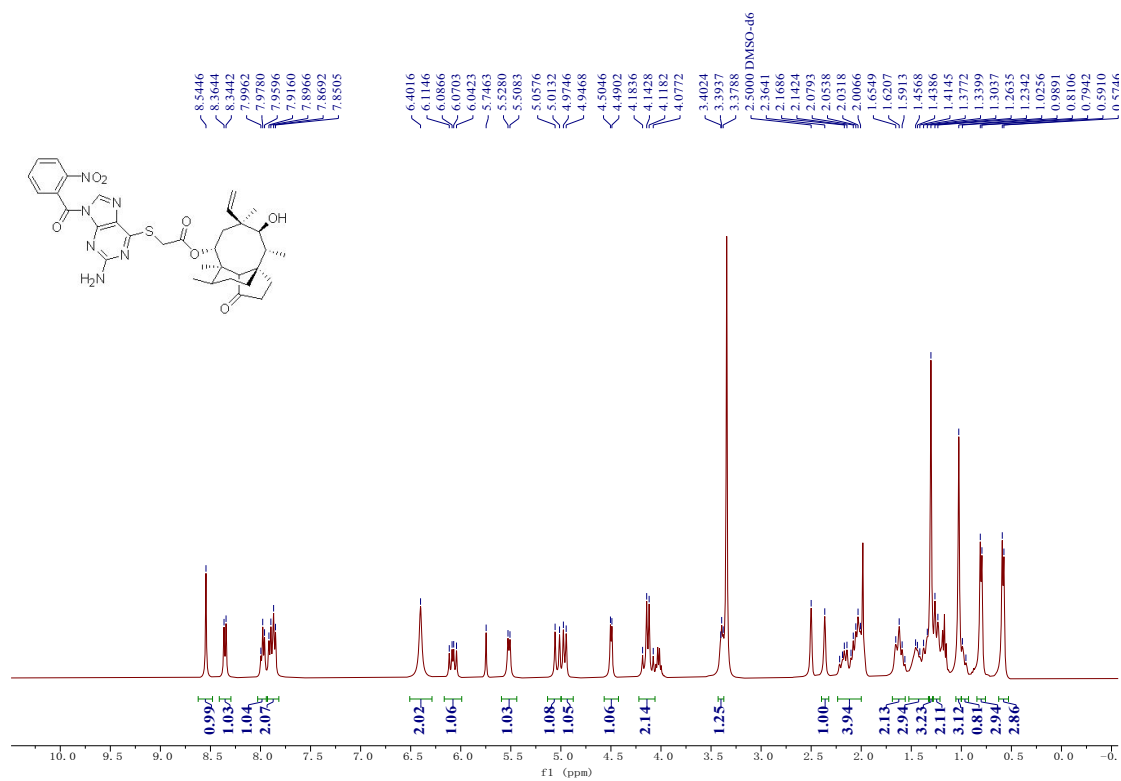

$^{13}\text{C}$  NMR (101 MHz,  $\text{DMSO-}d_6$ ) spectrum of **5c**

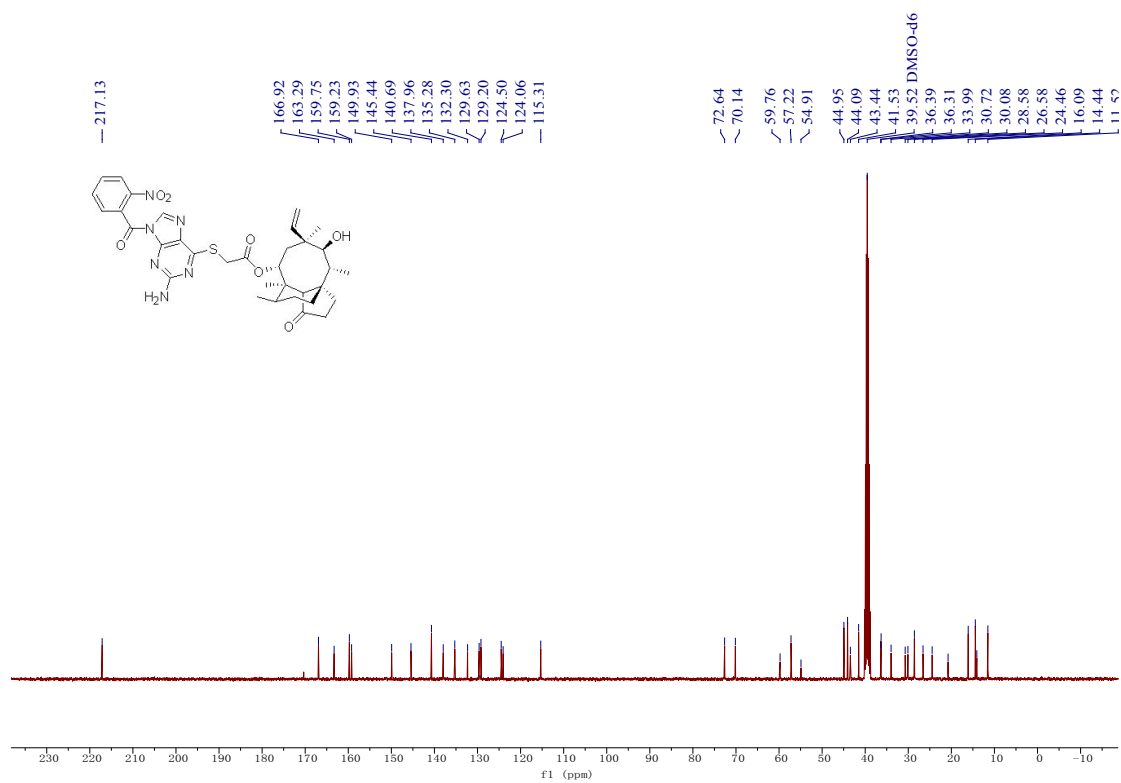

IR (KBr,  $\text{cm}^{-1}$ ) spectrum of **5c**

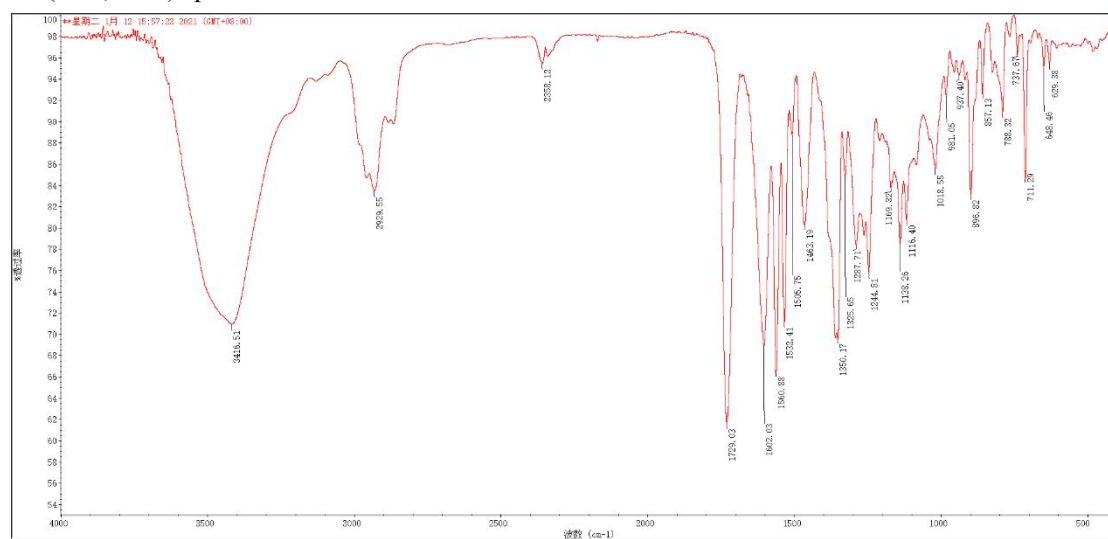

# HRMS spectrum of 5c

Spectrum from SHL-2020-09-28-POS-63.wiff2 (sample 1) - SHL-2020-09-28-POS-63, Experiment 1, +IDA TOF MS (100 - 800) from 0.287 min

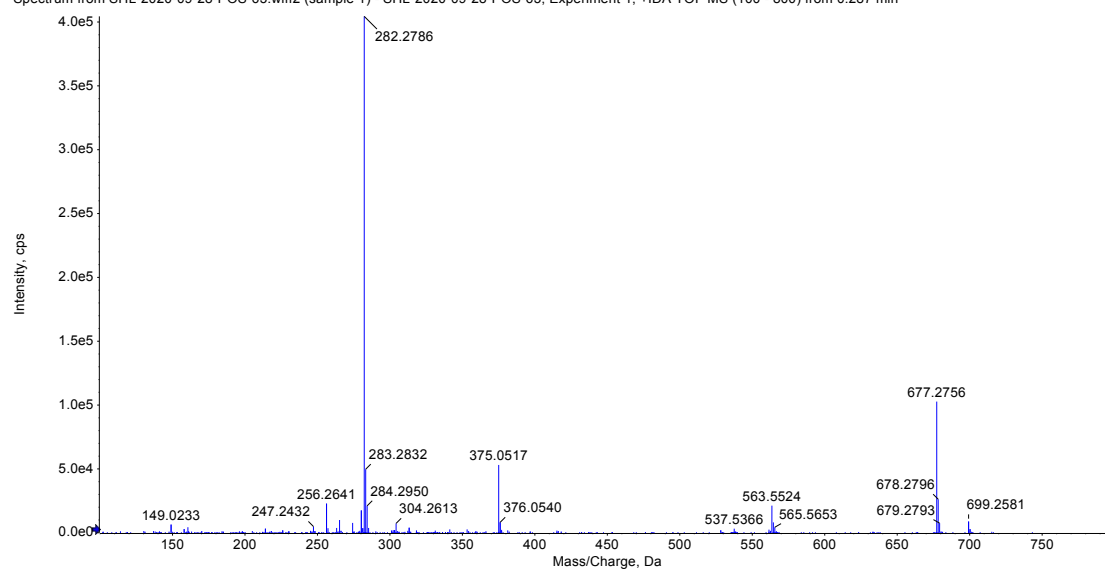

Spectrum from SHL-2020-09-28-POS-63.wiff2 (sample 1) - SHL-2020-09-28-POS-63, Experiment 1, +IDA TOF MS (100 - 800) from 0.287 min

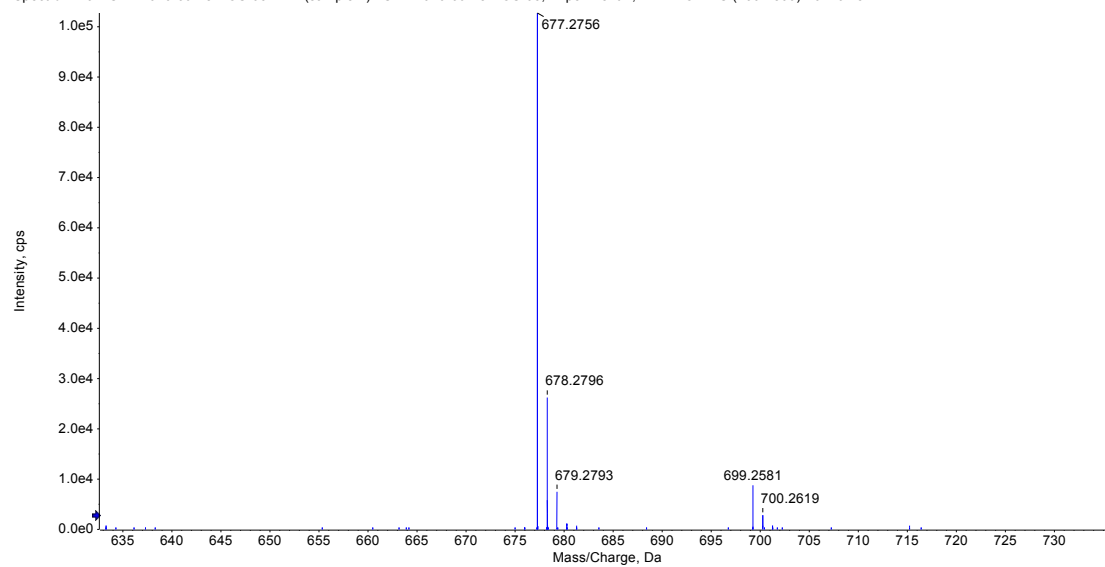

**Figure S8.** HPLC, <sup>1</sup>H NMR, <sup>13</sup>C NMR, HRMS and IR spectrum of final compound **5d**

HPLC spectrum of **5d**

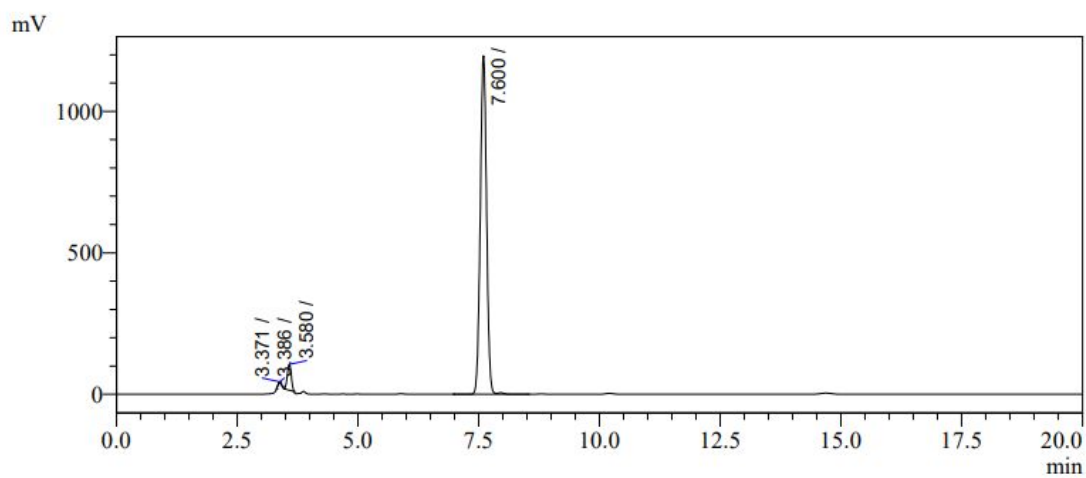

检测器A 254nm

| Peak# | Ret. Time | Height  | Area     | Area%  |
|-------|-----------|---------|----------|--------|
| 1     | 3.371     | -203    | 10839    | 0.095  |
| 2     | 3.386     | 3818    | 10120    | 0.089  |
| 3     | 3.580     | 91208   | 518421   | 4.555  |
| 4     | 7.600     | 1196853 | 10842553 | 95.261 |

<sup>1</sup>H NMR (400 MHz, DMSO-d<sub>6</sub>) spectrum of **5d**

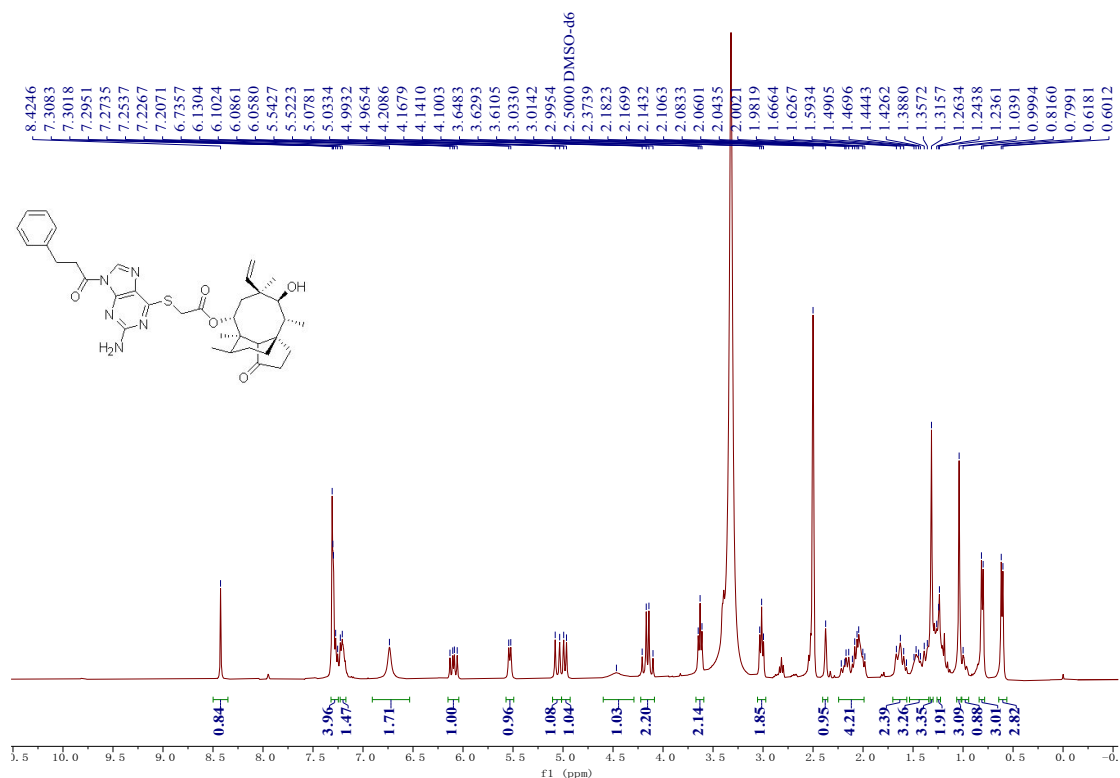

$^{13}\text{C}$  NMR (101 MHz,  $\text{DMSO-}d_6$ ) spectrum of **5d**

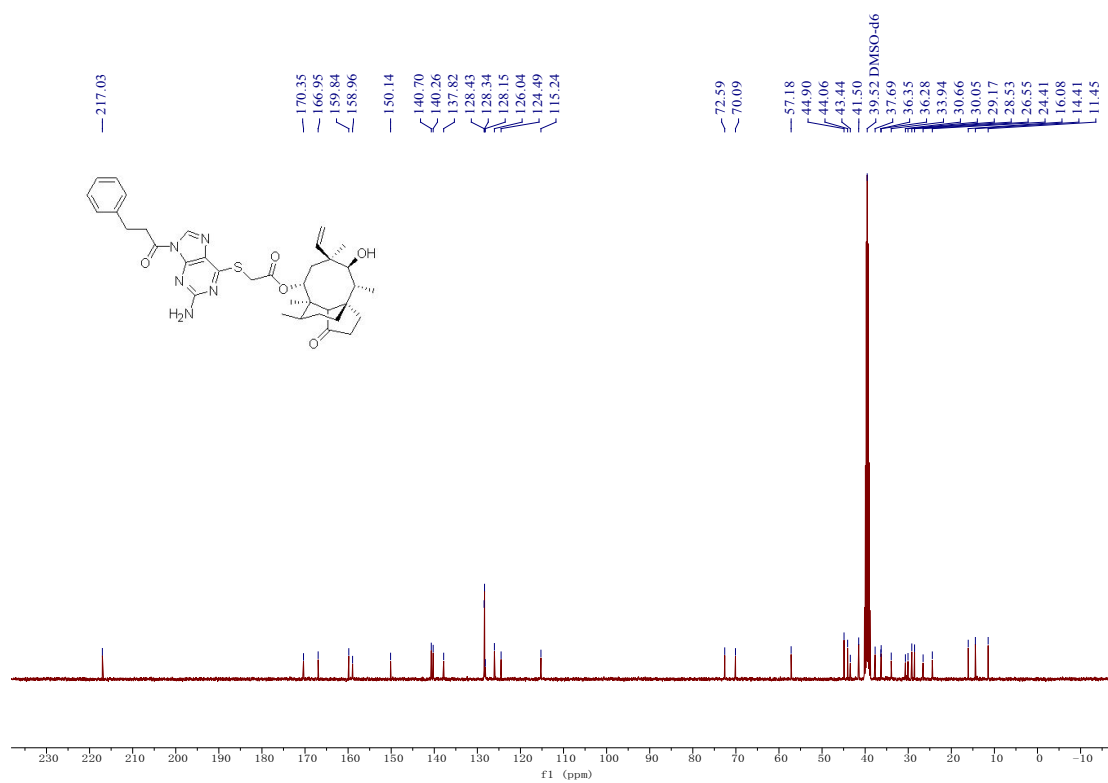

IR (KBr,  $\text{cm}^{-1}$ ) spectrum of **5d**

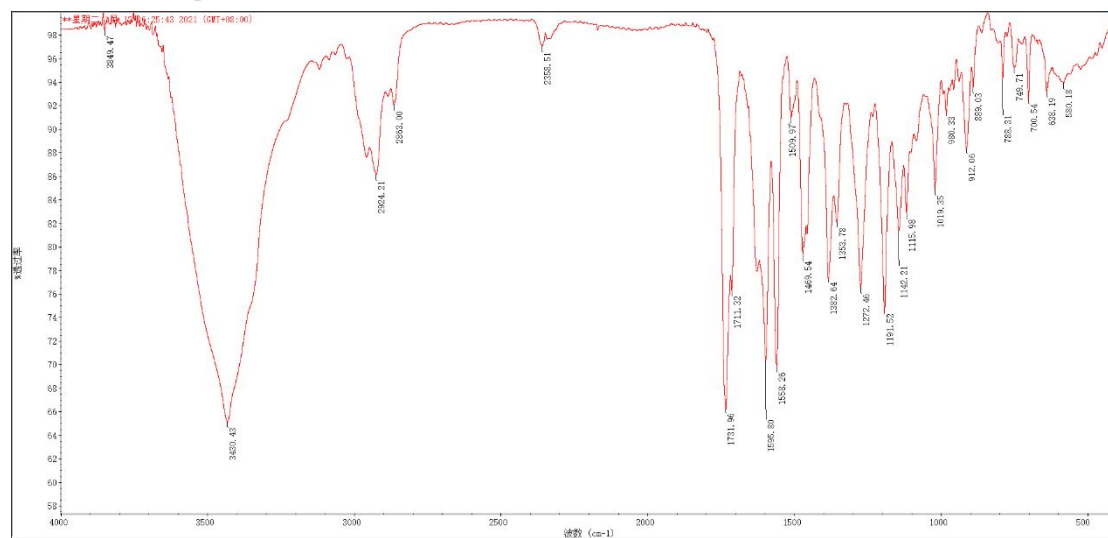

HRMS spectrum of **5d**

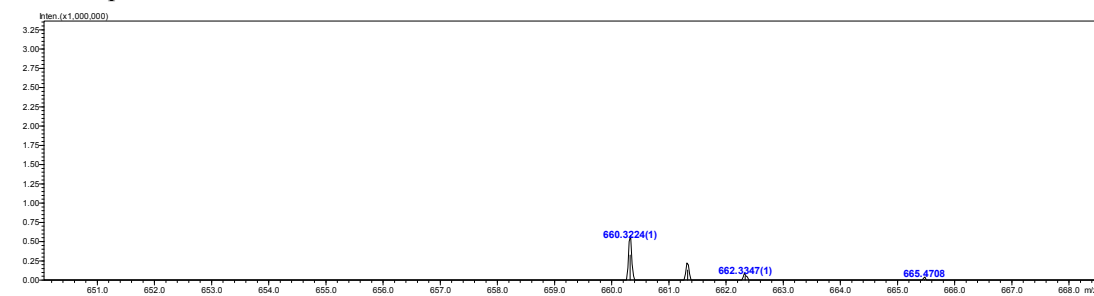

**Figure S9.** HPLC, <sup>1</sup>H NMR, <sup>13</sup>C NMR, HRMS and IR spectrum of final compound **6a**

HPLC spectrum of **6a**

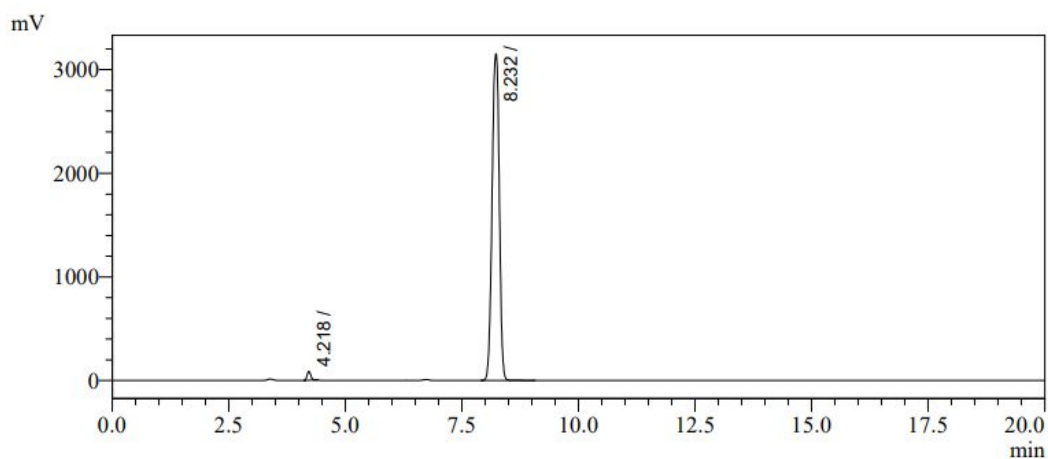

检测器A 254nm

| Peak# | Ret. Time | Height  | Area     | Area%  |
|-------|-----------|---------|----------|--------|
| 1     | 4.218     | 85970   | 466259   | 1.357  |
| 2     | 8.232     | 3154092 | 33900460 | 98.643 |

<sup>1</sup>H NMR (400 MHz, CDCl<sub>3</sub>) spectrum of **6a**

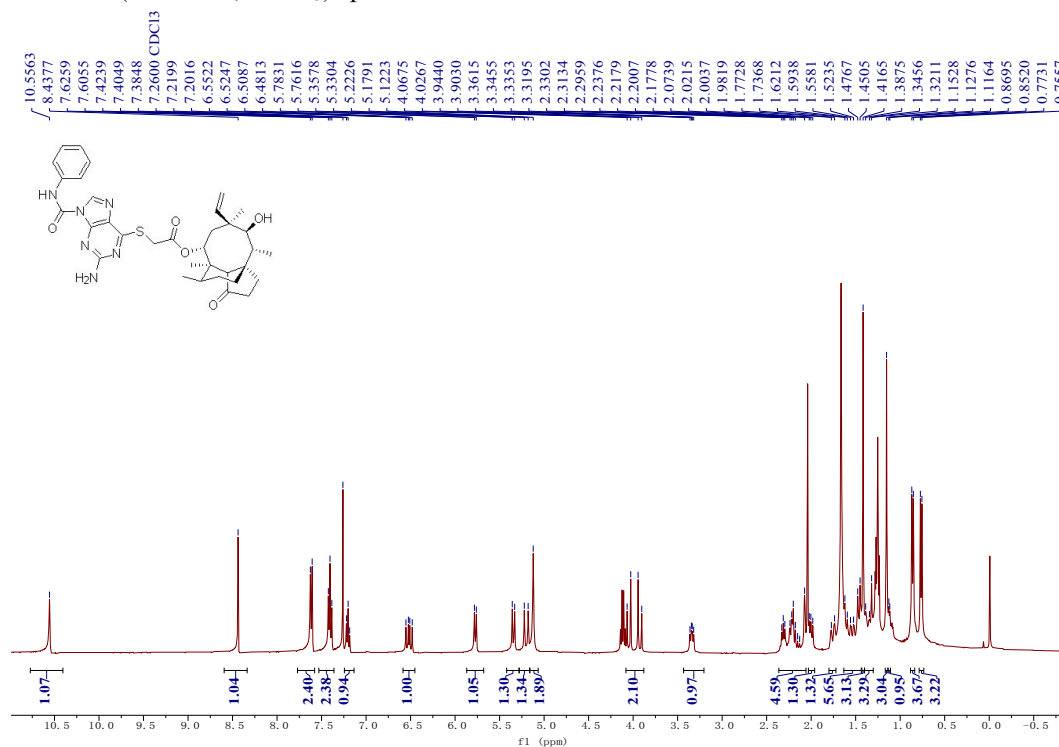

$^{13}\text{C}$  NMR (101 MHz,  $\text{CDCl}_3$ ) spectrum of **6a**

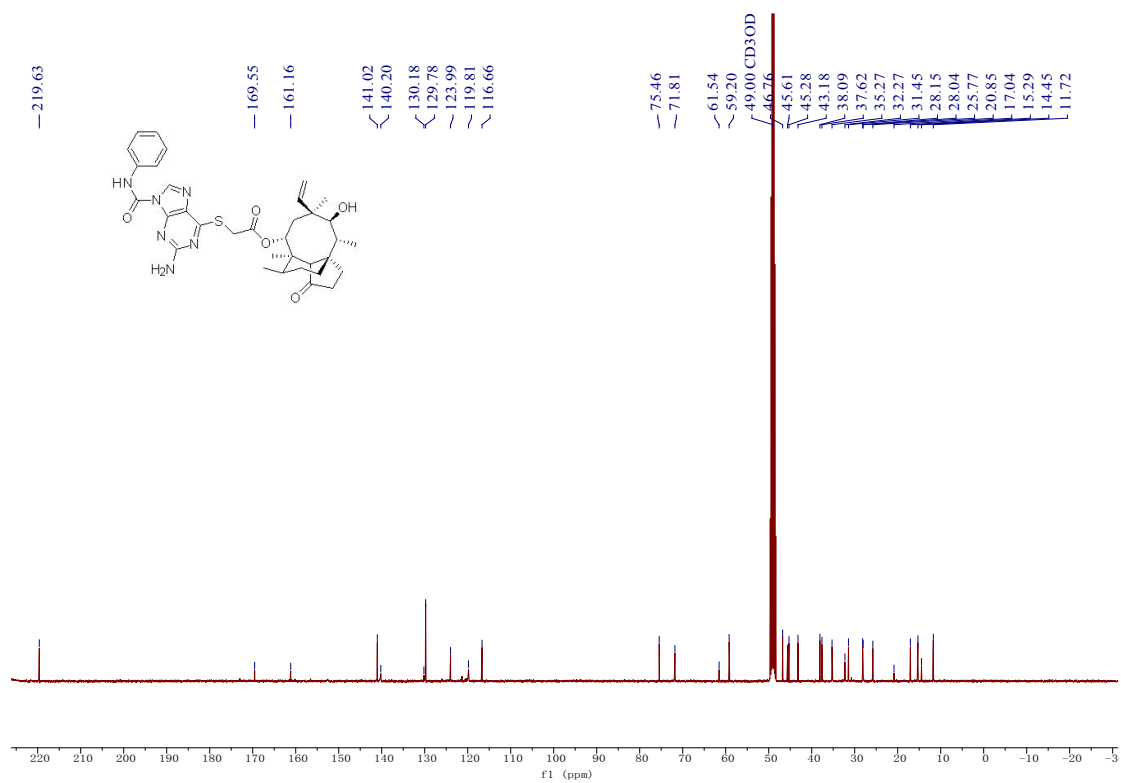

IR (KBr,  $\text{cm}^{-1}$ ) spectrum of **6a**

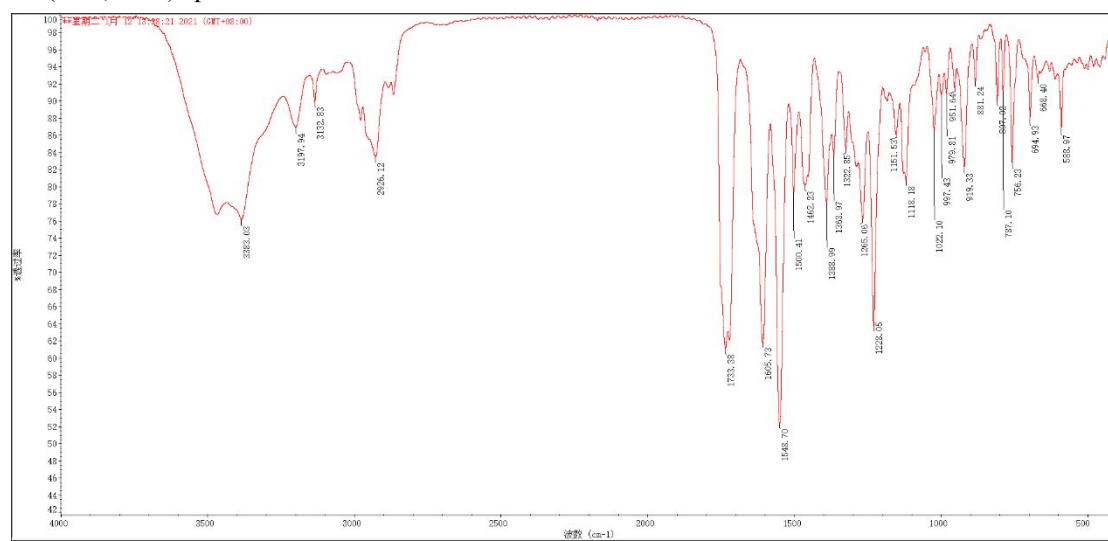



# HRMS spectrum of 6a

Spectrum from SHL-2020-09-04-POS-71.wiff2 (sample 1) - SHL-2020-09-04-POS-71, Experiment 1, +IDA TOF MS (100 - 1000) from 0.530 min

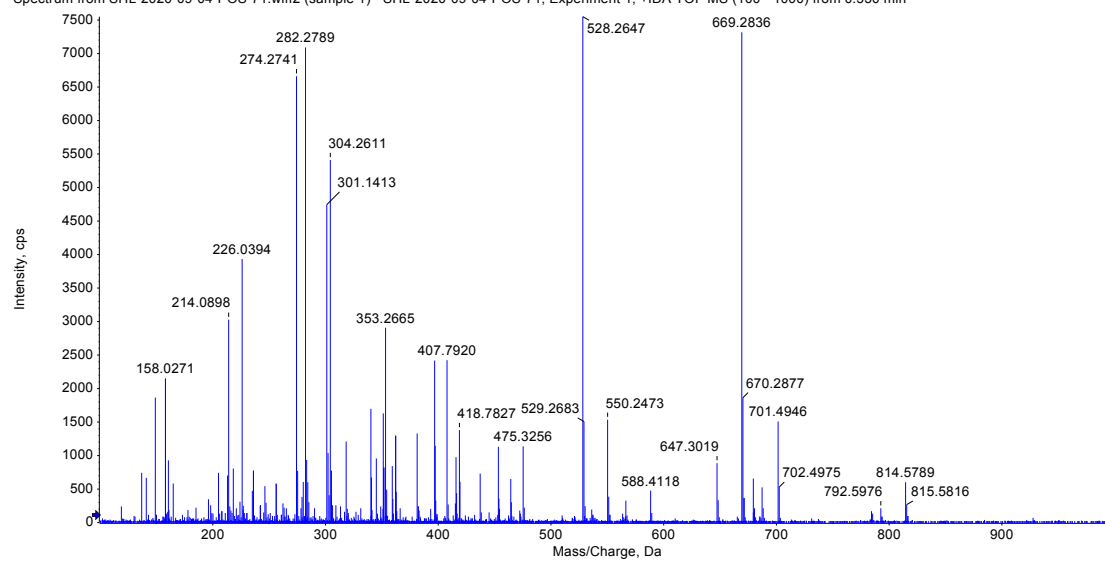

Spectrum from SHL-2020-09-04-POS-71.wiff2 (sample 1) - SHL-2020-09-04-POS-71, Experiment 1, +IDA TOF MS (100 - 1000) from 0.530 min

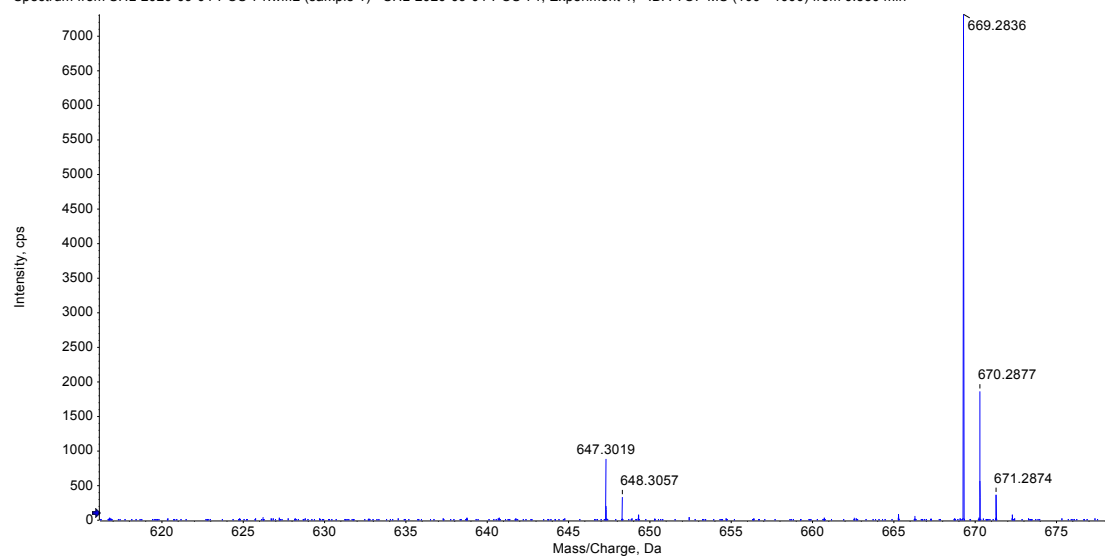

**Figure S10.** HPLC,  $^1\text{H}$  NMR,  $^{13}\text{C}$  NMR, HRMS and IR spectrum of final compound **6b**

HPLC spectrum of **6b**

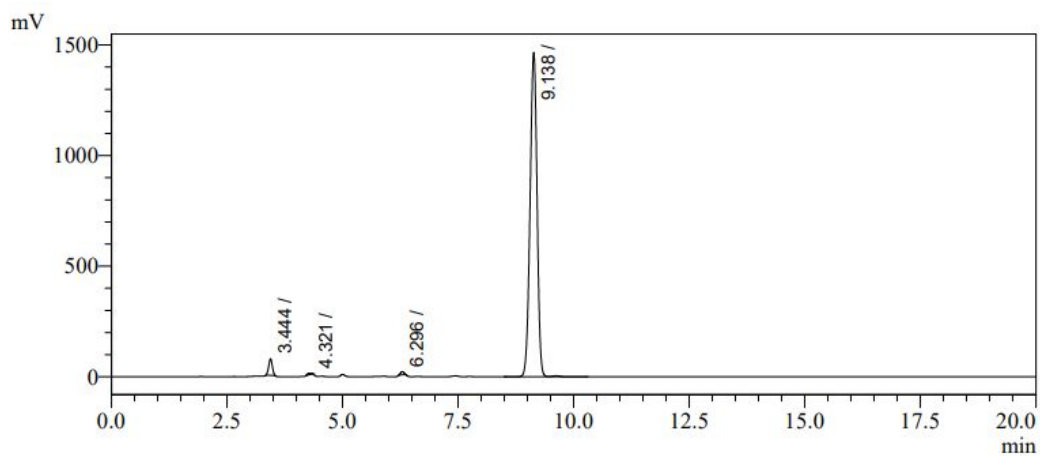

检测器A 254nm

| Peak# | Ret. Time | Height  | Area     | Area%  |
|-------|-----------|---------|----------|--------|
| 1     | 3.444     | 74687   | 404513   | 2.545  |
| 2     | 4.321     | 5721    | 40406    | 0.254  |
| 3     | 6.296     | 14039   | 71848    | 0.452  |
| 4     | 9.138     | 1465946 | 15376410 | 96.748 |

$^1\text{H}$  NMR (400 MHz,  $\text{CDCl}_3$ ) spectrum of **6b**

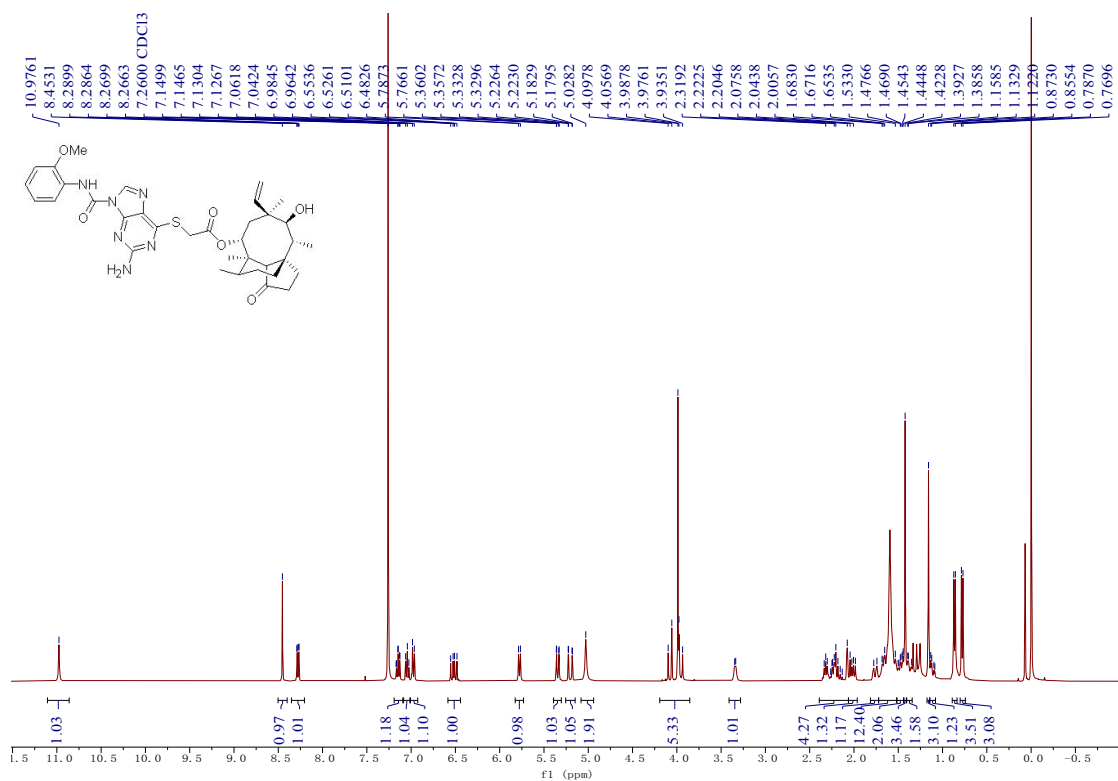

### $^{13}\text{C}$ NMR (101 MHz, $\text{DMSO-}d_6$ ) spectrum of **6b**

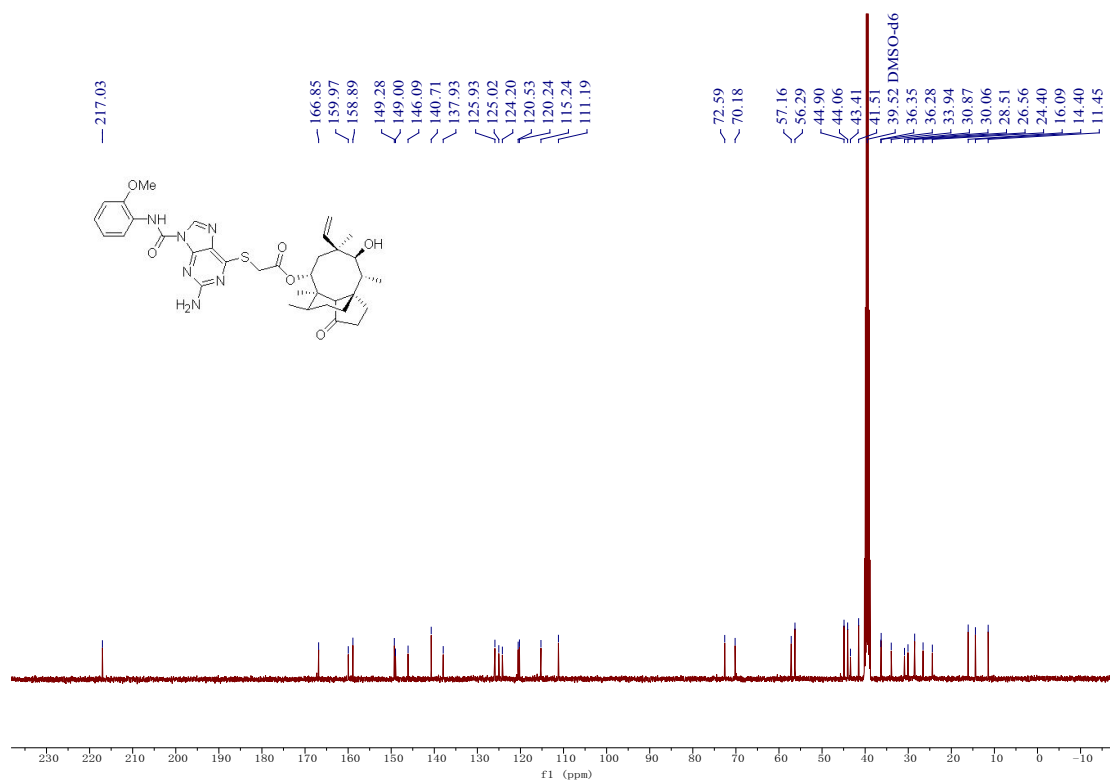

### IR (KBr, $\text{cm}^{-1}$ ) spectrum of **6b**

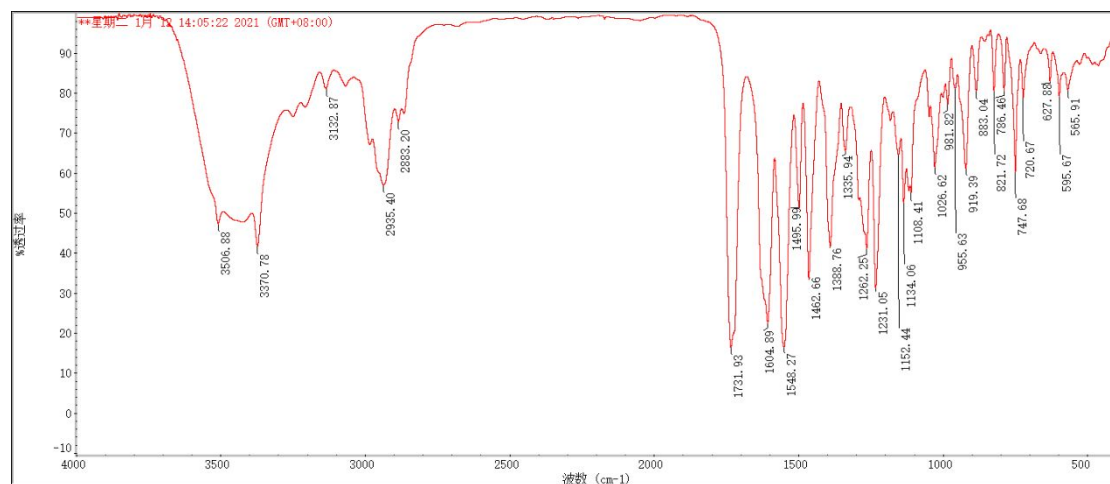

### HRMS spectrum of **6b**

Spectrum from SHL-2020-09-04-POS-76.wiff2 (sample 1) - SHL-2020-09-04-POS-76, Experiment 1, +IDA TOF MS (100 - 1000) from 0.345 min

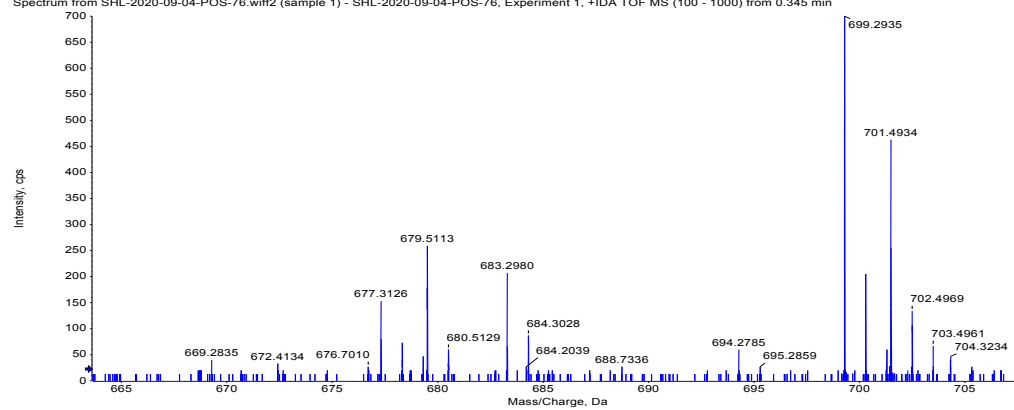

**Figure S11.** HPLC,  $^1\text{H}$  NMR,  $^{13}\text{C}$  NMR, HRMS and IR spectrum of final compound **6c**

HPLC spectrum of **6c**

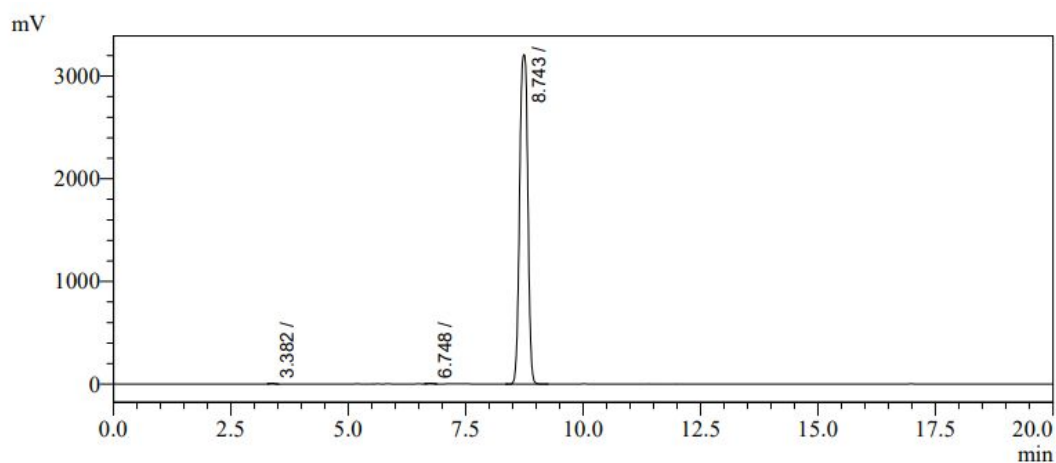

检测器A 254nm

| Peak# | Ret. Time | Height  | Area     | Area%  |
|-------|-----------|---------|----------|--------|
| 1     | 3.382     | 6517    | 42647    | 0.110  |
| 2     | 6.748     | 5300    | 40652    | 0.105  |
| 3     | 8.743     | 3211358 | 38717198 | 99.785 |

$^1\text{H}$  NMR (400 MHz,  $\text{DMSO}-d_6$ ) spectrum of **6c**

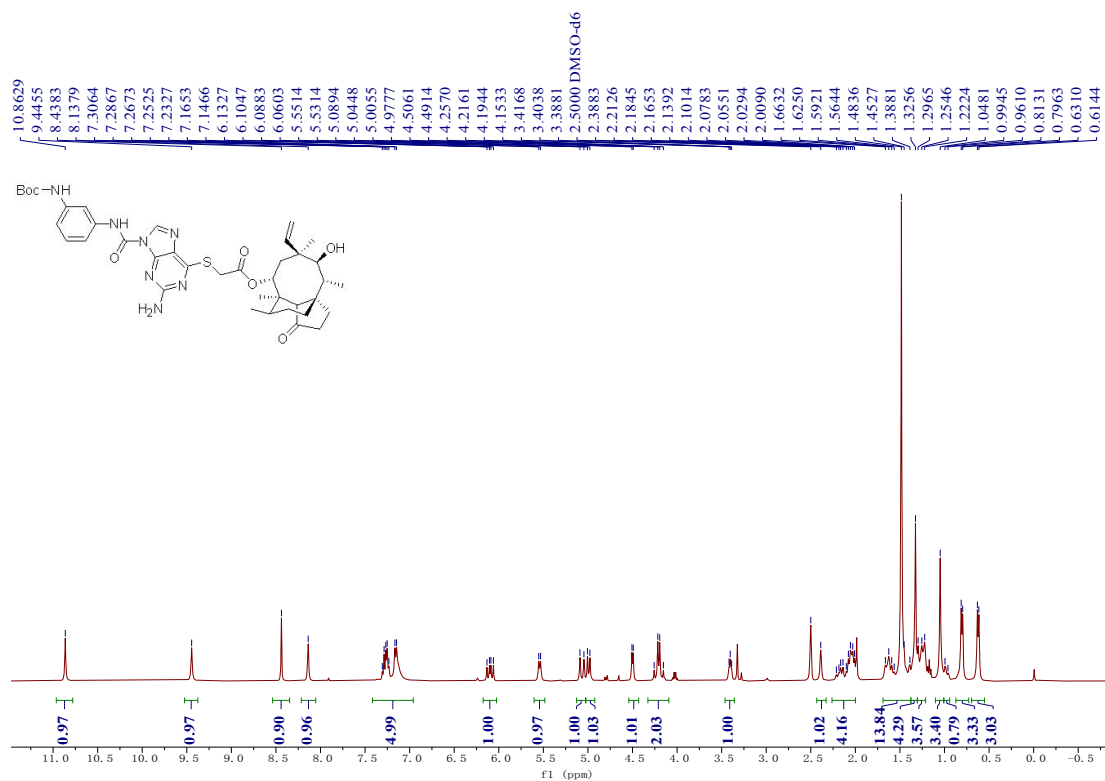

$^{13}\text{C}$  NMR (101 MHz,  $\text{DMSO-}d_6$ ) spectrum of **6c**

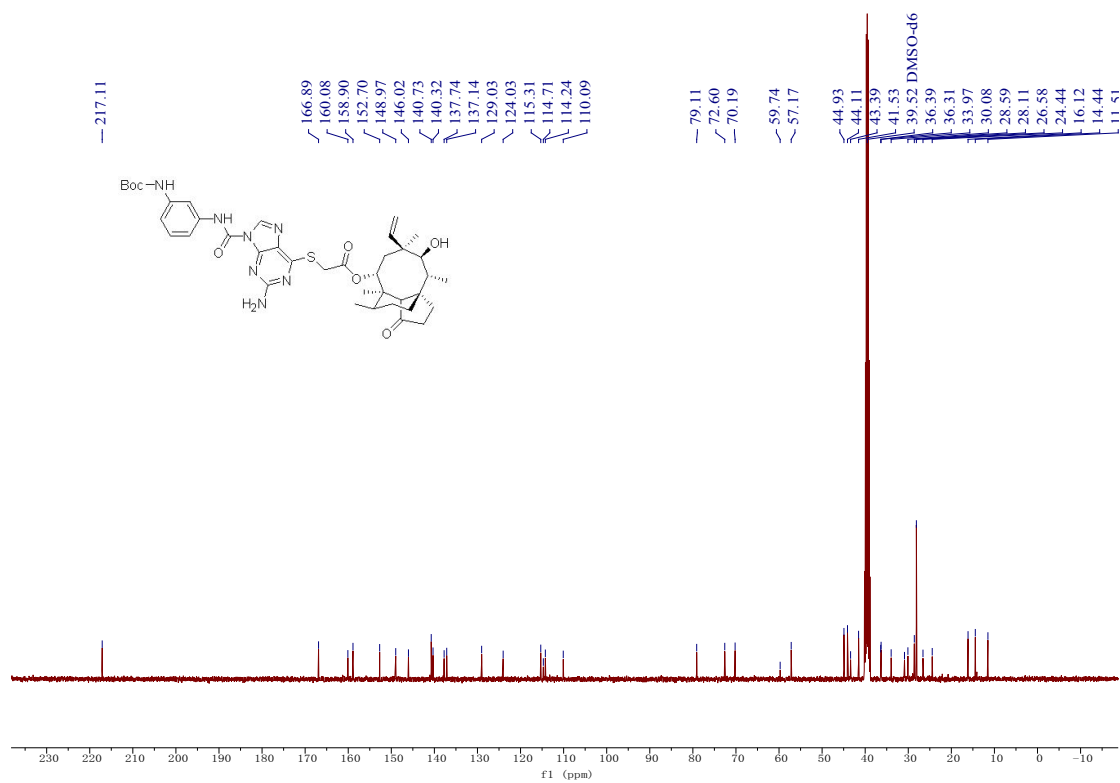

IR (KBr,  $\text{cm}^{-1}$ ) spectrum of **6c**

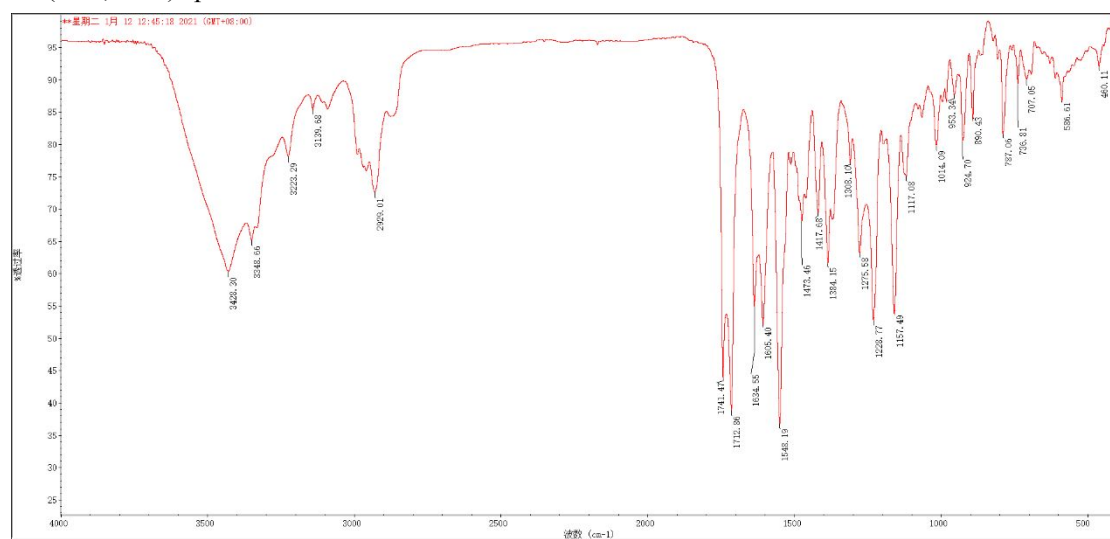

# HRMS spectrum of 6c

Spectrum from SHL-2020-09-04-POS-67.wiff2 (sample 1) - SHL-2020-09-04-POS-67, Experiment 1, +IDA TOF MS (100 - 1000) from 0.187 to 1.535 min

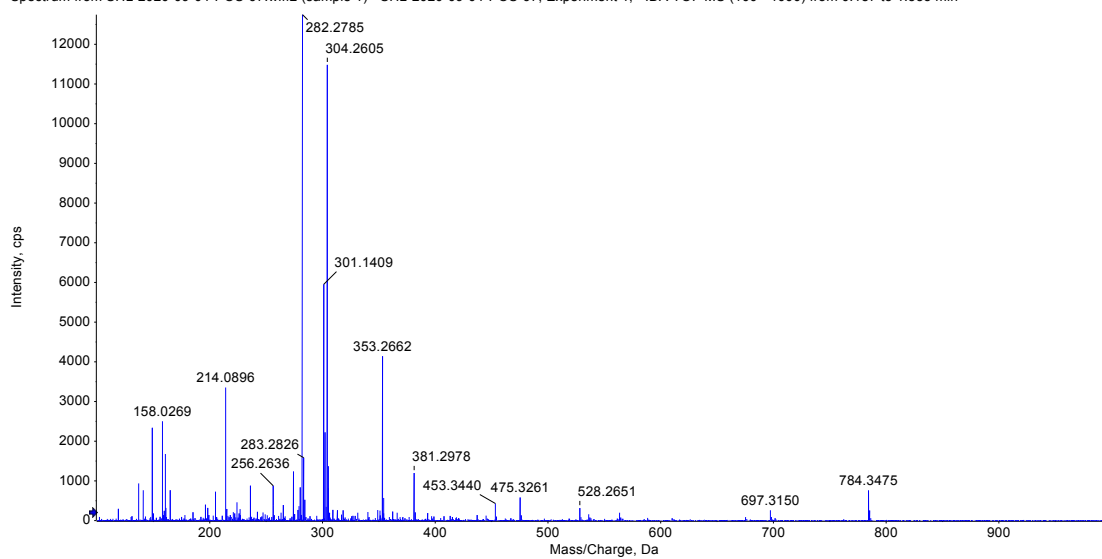

Spectrum from SHL-2020-09-04-POS-67.wiff2 (sample 1) - SHL-2020-09-04-POS-67, Experiment 1, +IDA TOF MS (100 - 1000) from 0.187 to 1.535 min

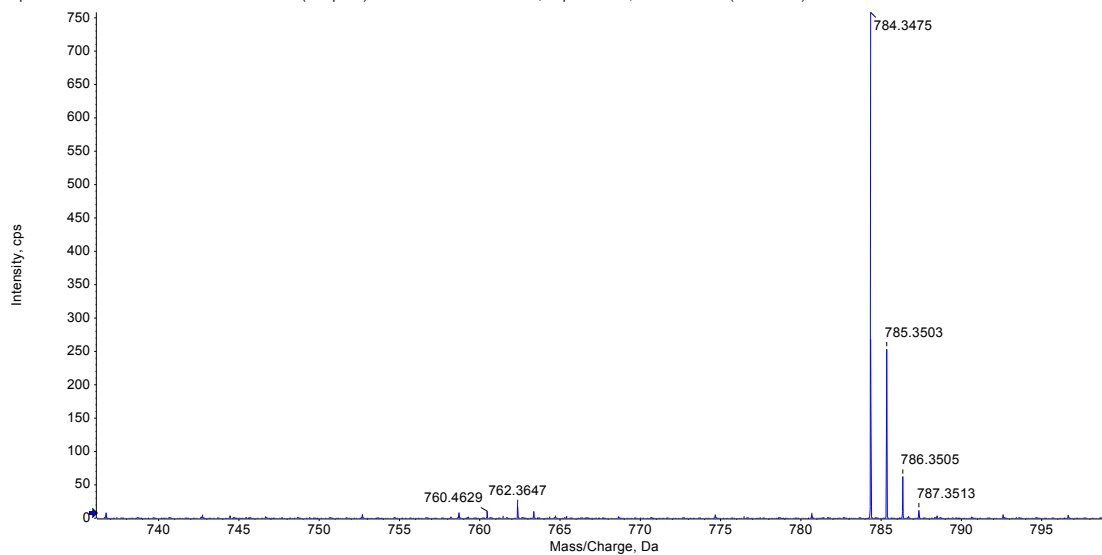

**Figure S12.** HPLC,  $^1\text{H}$  NMR,  $^{13}\text{C}$  NMR, HRMS and IR spectrum of final compound **6d**

HPLC spectrum of **6d**

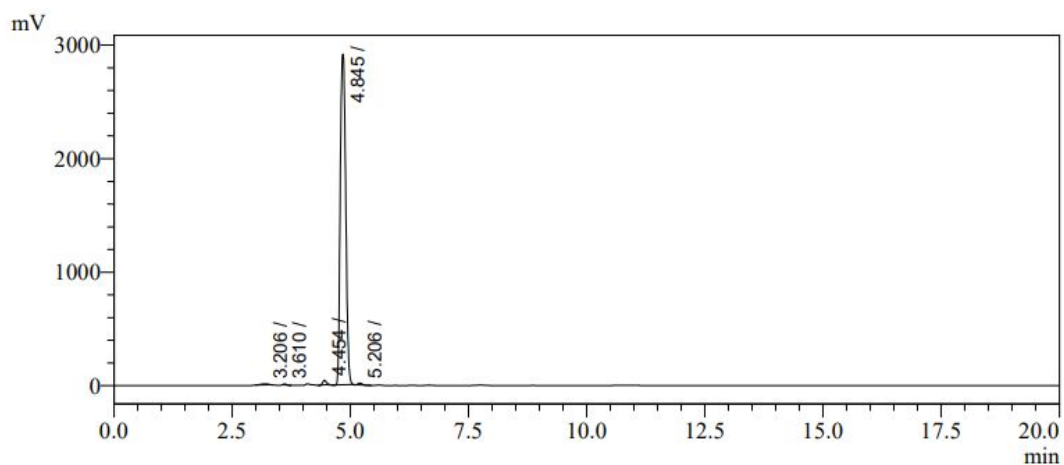

检测器A 254nm

| Peak# | Ret. Time | Height  | Area     | Area%  |
|-------|-----------|---------|----------|--------|
| 1     | 3.206     | 8334    | 95704    | 0.403  |
| 2     | 3.610     | 9182    | 40996    | 0.173  |
| 3     | 4.454     | 39300   | 210718   | 0.888  |
| 4     | 4.845     | 2915580 | 23282334 | 98.130 |
| 5     | 5.206     | 17042   | 96198    | 0.405  |

$^1\text{H}$  NMR (400 MHz,  $\text{DMSO}-d_6$ ) spectrum of **6d**

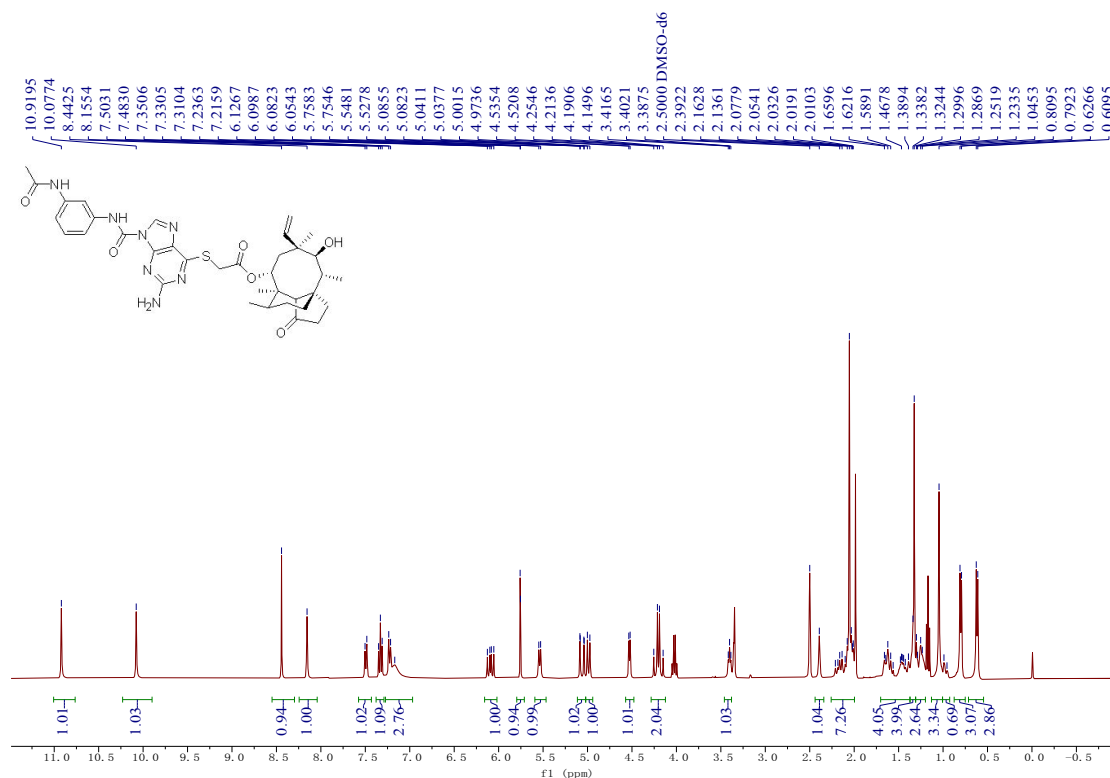

$^{13}\text{C}$  NMR (101 MHz,  $\text{DMSO-}d_6$ ) spectrum of **6d**

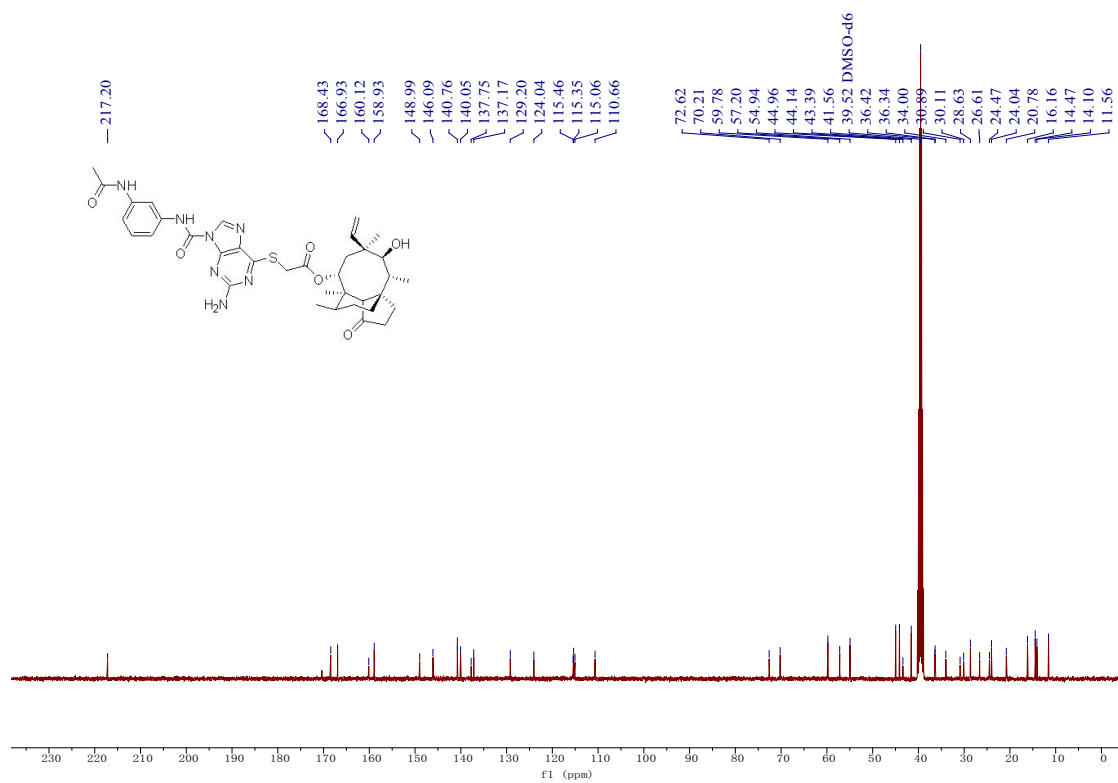

IR (KBr,  $\text{cm}^{-1}$ ) spectrum of **6d**

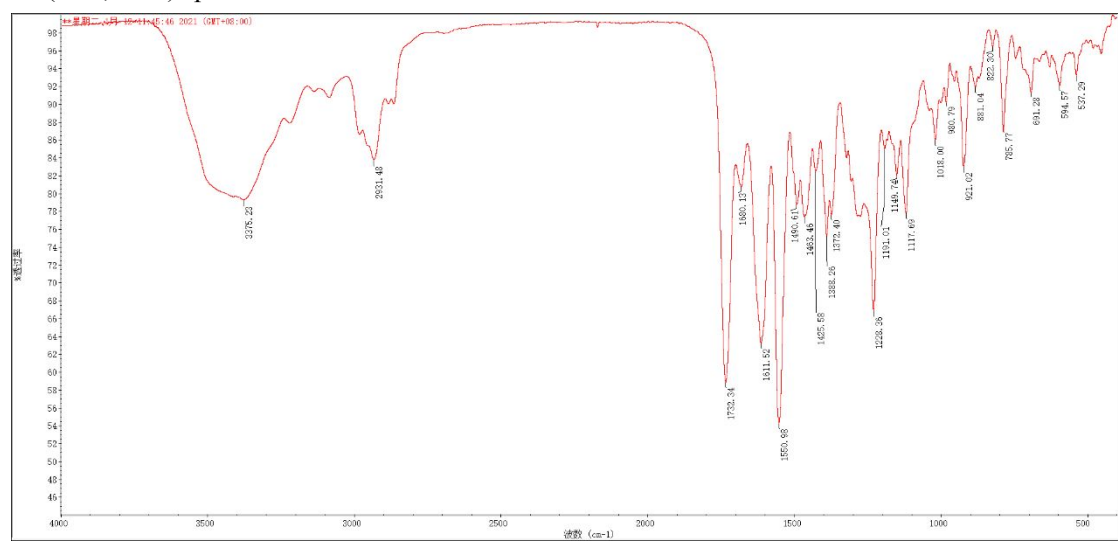



# HRMS spectrum of 6d

Spectrum from SHL-2020-09-04-POS-75.wiff2 (sample 1) - SHL-2020-09-04-POS-75, Experiment 1, +IDA TOF MS (100 - 1000) from 0.537 min

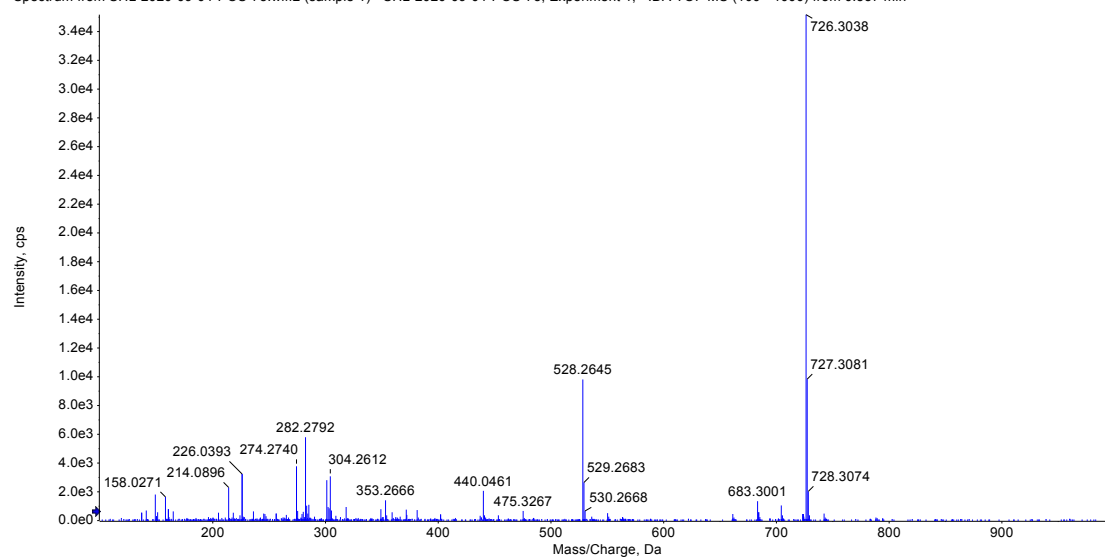

Spectrum from SHL-2020-09-04-POS-75.wiff2 (sample 1) - SHL-2020-09-04-POS-75, Experiment 1, +IDA TOF MS (100 - 1000) from 0.537 min

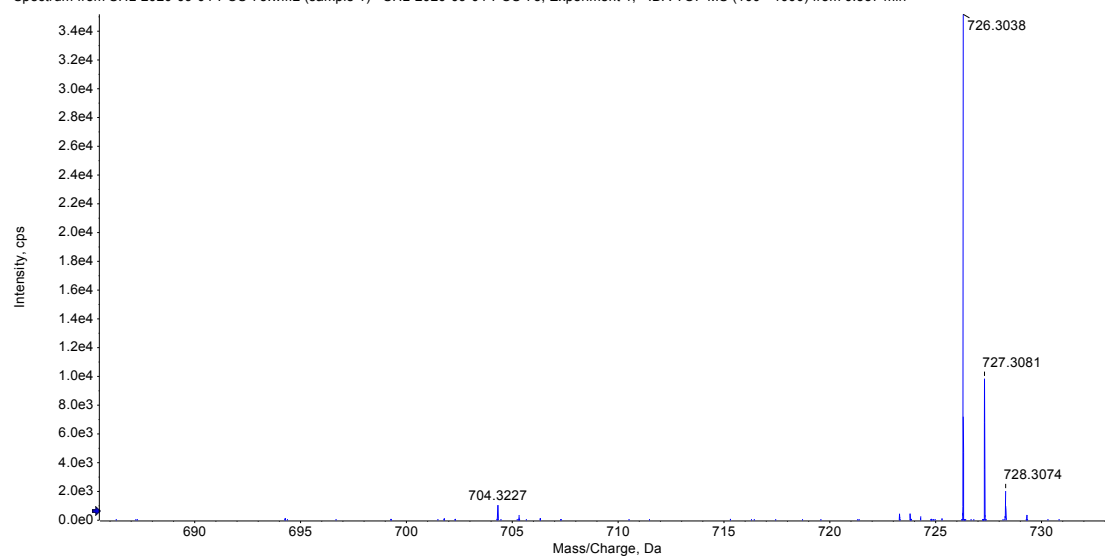

**Figure S13.** HPLC,  $^1\text{H}$  NMR,  $^{13}\text{C}$  NMR, HRMS and IR spectrum of final compound **6e**

HPLC spectrum of **6e**

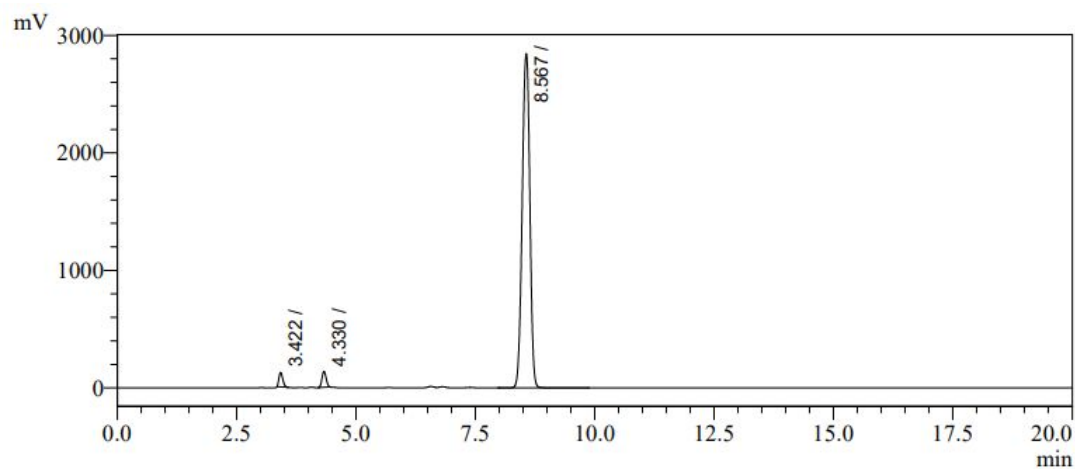

检测器A 254nm

| Peak# | Ret. Time | Height  | Area     | Area%  |
|-------|-----------|---------|----------|--------|
| 1     | 3.422     | 122391  | 680641   | 2.056  |
| 2     | 4.330     | 135798  | 825672   | 2.495  |
| 3     | 8.567     | 2843352 | 31591029 | 95.449 |

$^1\text{H}$  NMR (400 MHz,  $\text{DMSO}-d_6$ ) spectrum of **6e**

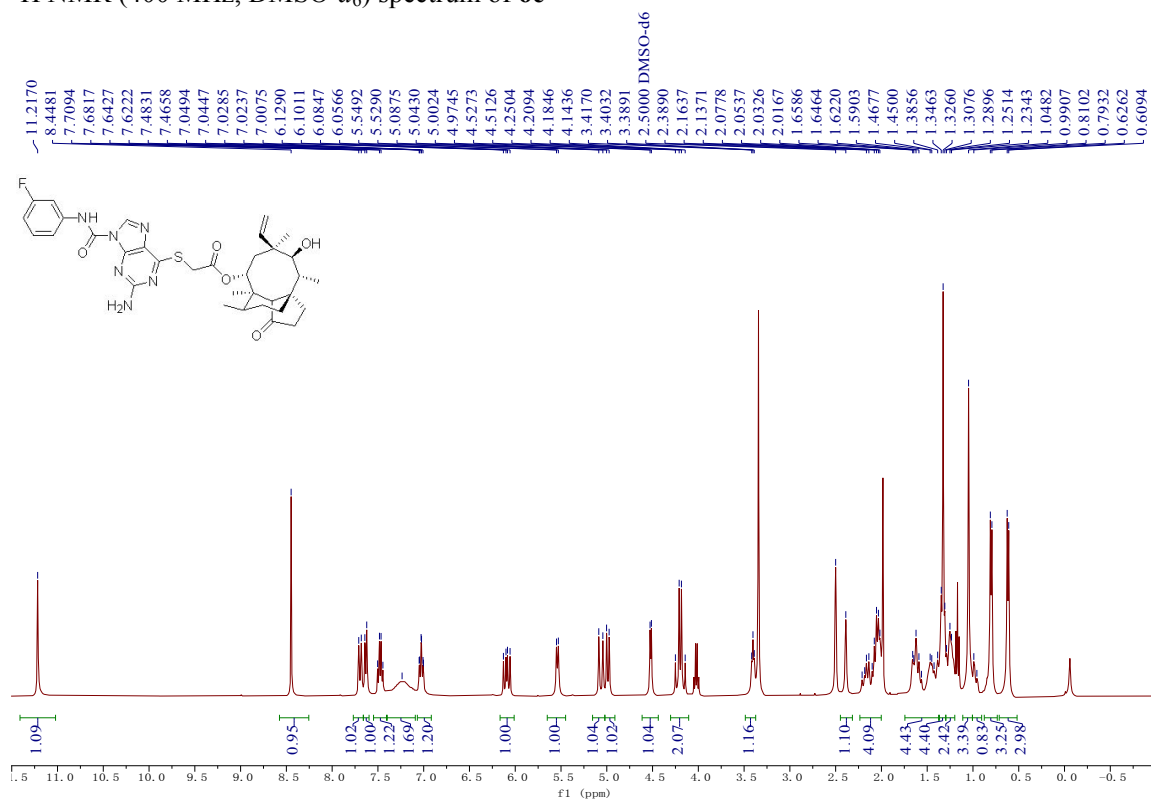

$^{13}\text{C}$  NMR (101 MHz,  $\text{DMSO-}d_6$ ) spectrum of **6e**

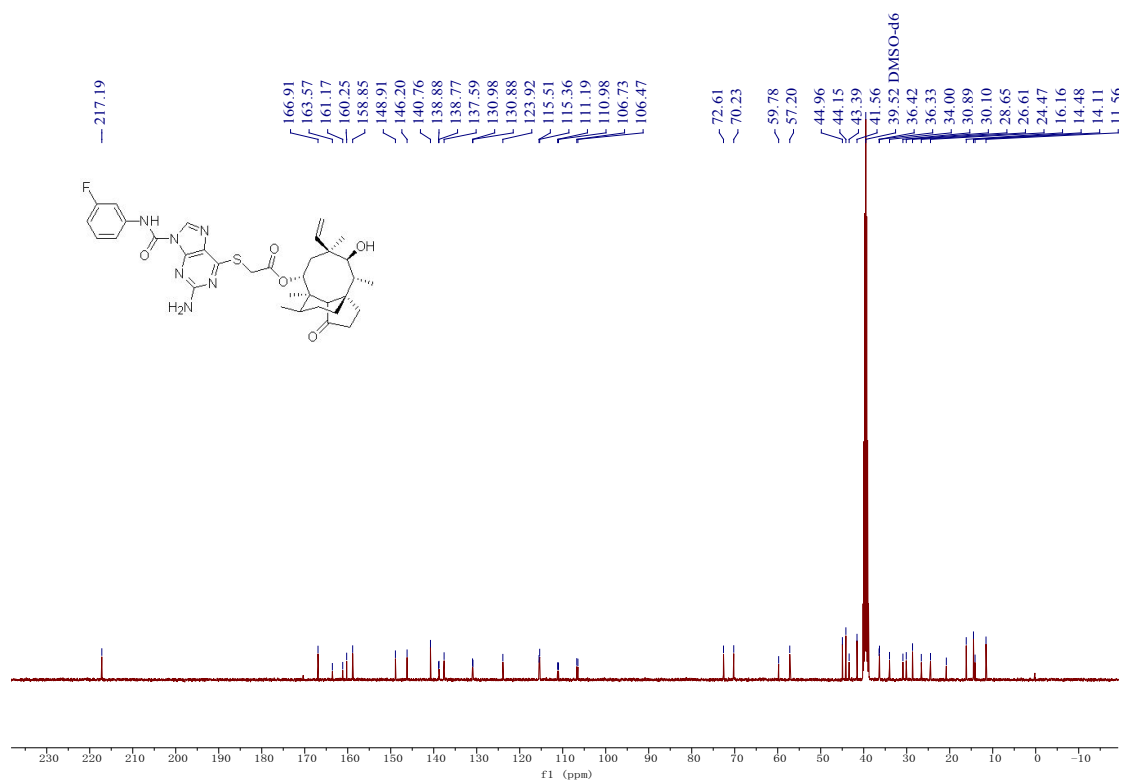

IR (KBr,  $\text{cm}^{-1}$ ) spectrum of **6e**

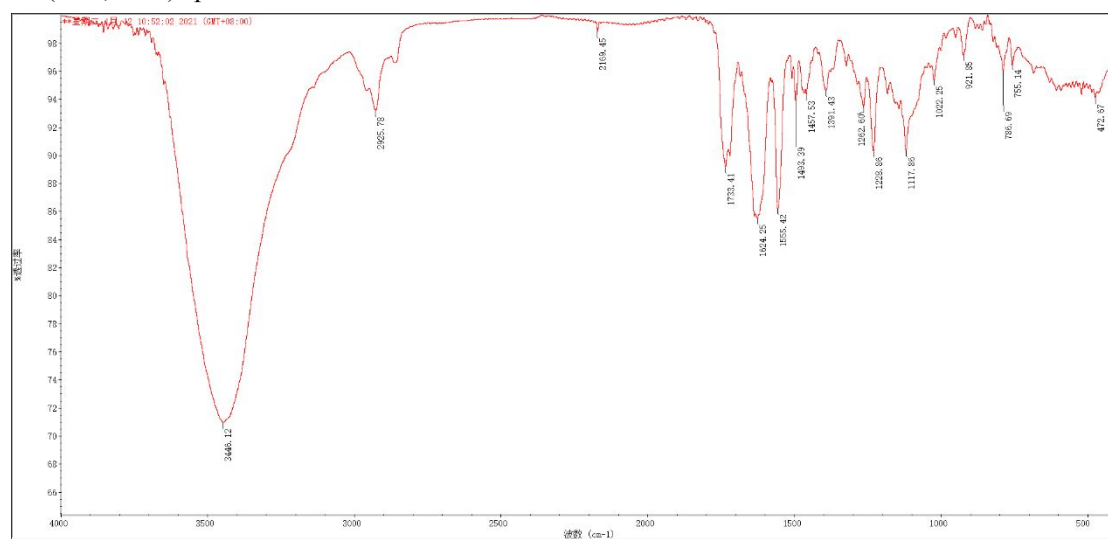

# HRMS spectrum of 6e

Spectrum from SHL-2020-09-04-POS-70.wiff2 (sample 1) - SHL-2020-09-04-POS-70, Experiment 1, +IDA TOF MS (100 - 1000) from 0.306 min

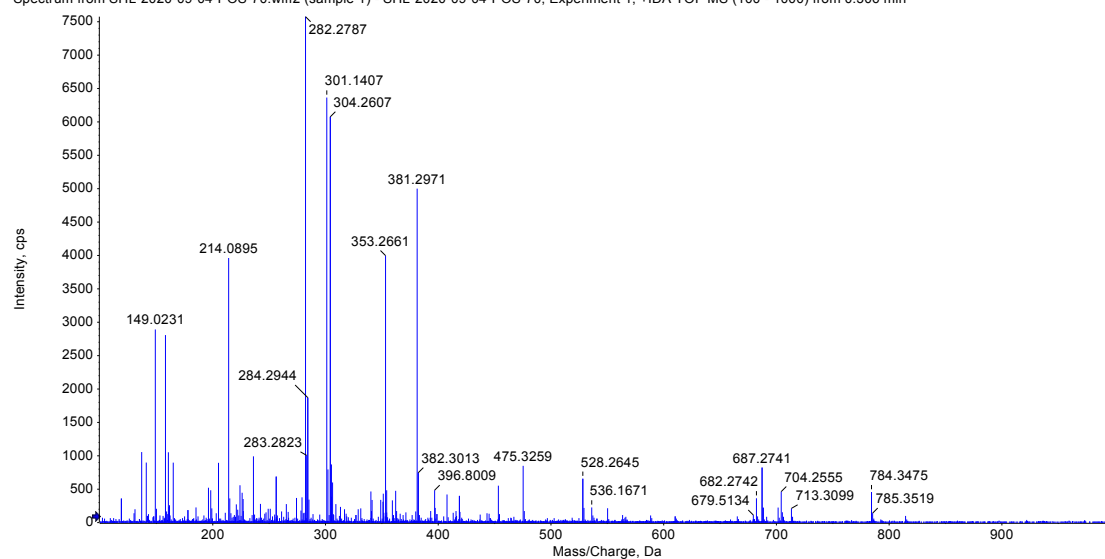

Spectrum from SHL-2020-09-04-POS-70.wiff2 (sample 1) - SHL-2020-09-04-POS-70, Experiment 1, +IDA TOF MS (100 - 1000) from 0.306 min

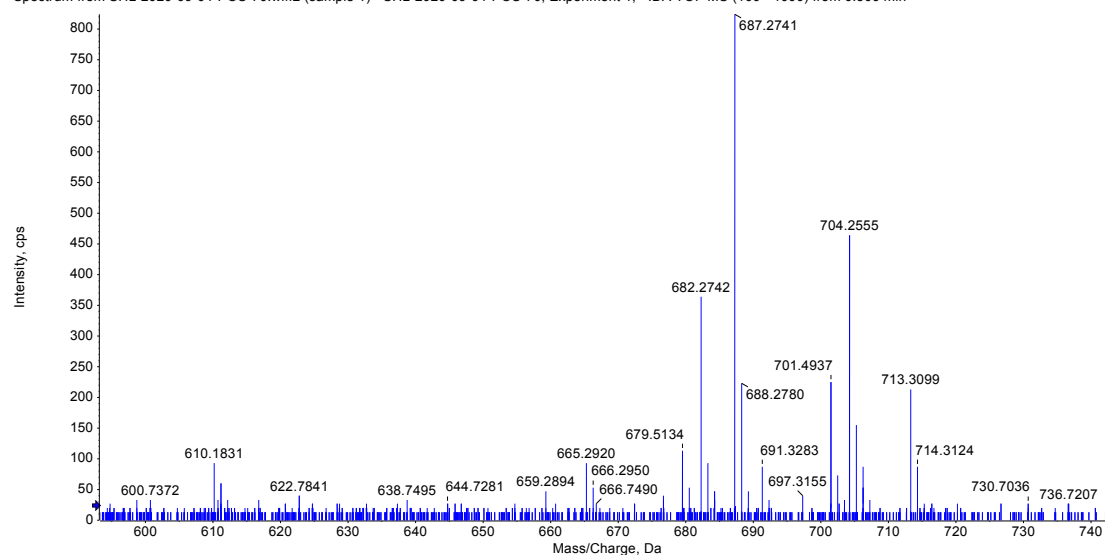

**Figure S14.** HPLC,  $^1\text{H}$  NMR,  $^{13}\text{C}$  NMR, HRMS and IR spectrum of final compound **6f**  
HPLC spectrum of **6f**

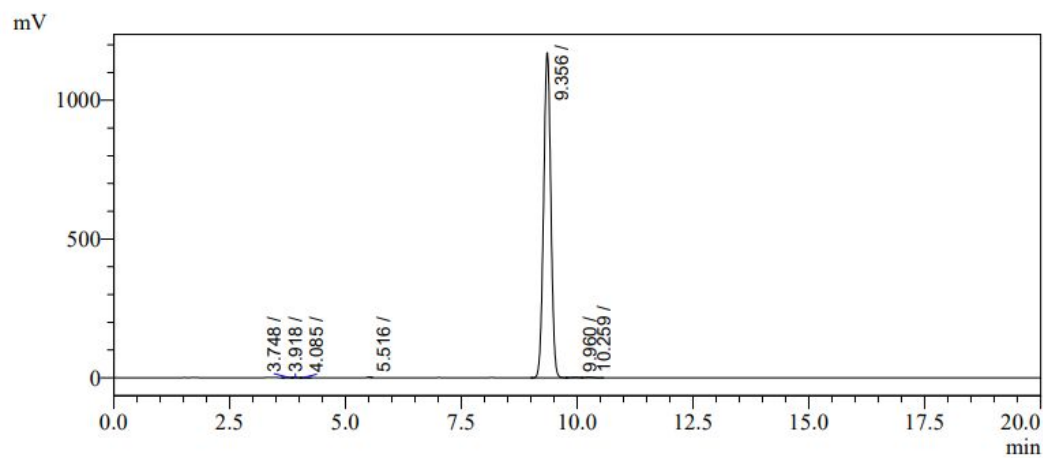

检测器A 254nm

| Peak# | Ret. Time | Height  | Area     | Area%  |
|-------|-----------|---------|----------|--------|
| 1     | 3.748     | 2112    | 13113    | 0.102  |
| 2     | 3.918     | 1876    | 11544    | 0.090  |
| 3     | 4.085     | 499     | 3509     | 0.027  |
| 4     | 5.516     | 446     | 1075     | 0.008  |
| 5     | 9.356     | 1172068 | 12726677 | 99.341 |
| 6     | 9.960     | 2215    | 27579    | 0.215  |
| 7     | 10.259    | 2357    | 27592    | 0.215  |

$^1\text{H}$  NMR (400 MHz,  $\text{DMSO}-d_6$ ) spectrum of **6f**

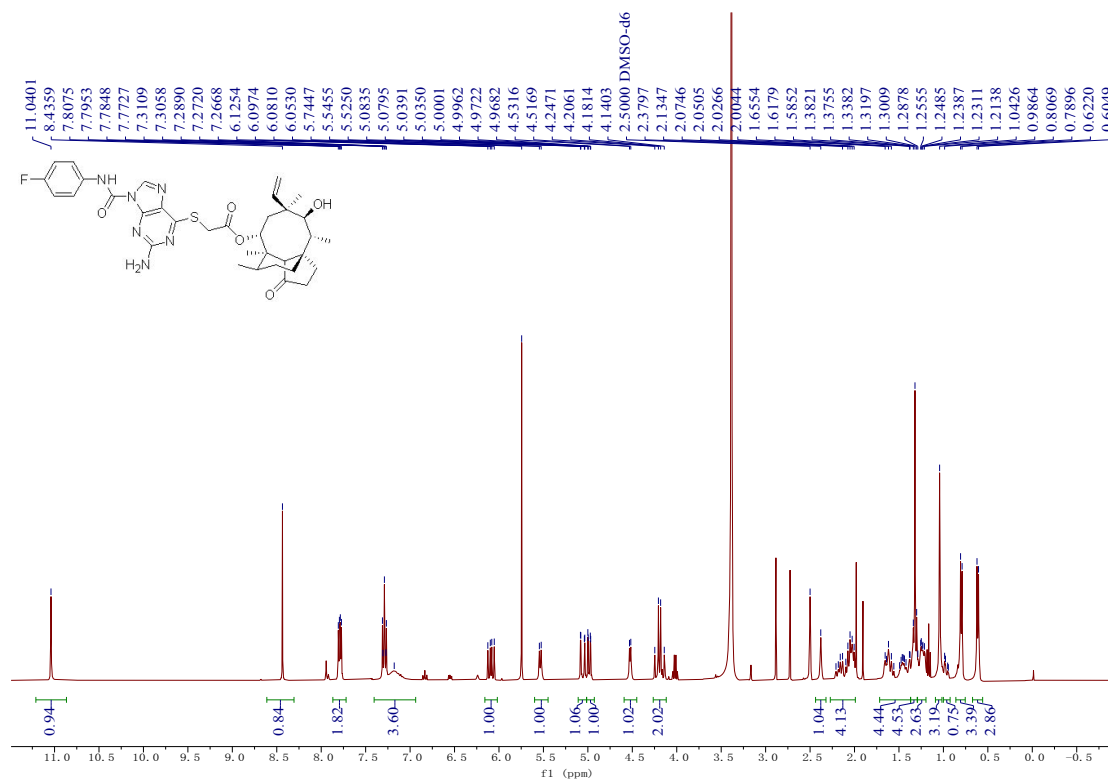

$^{13}\text{C}$  NMR (101 MHz,  $\text{DMSO-}d_6$ ) spectrum of **6f**

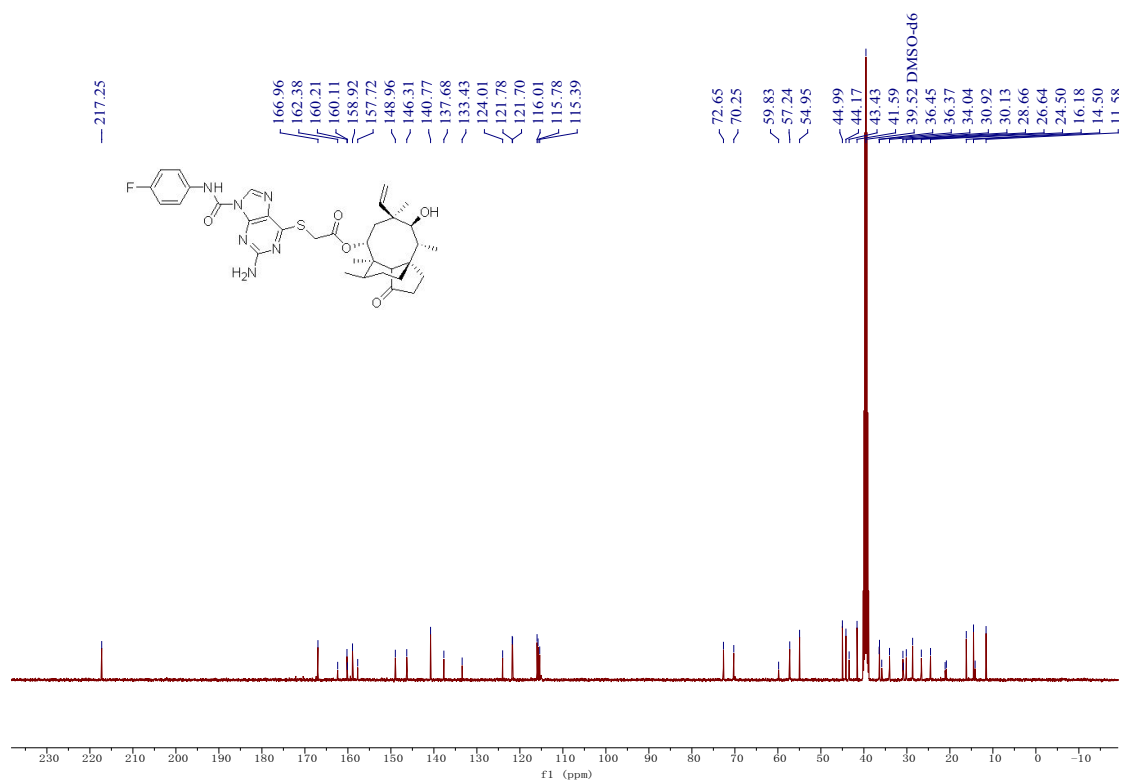

IR (KBr,  $\text{cm}^{-1}$ ) spectrum of **6f**

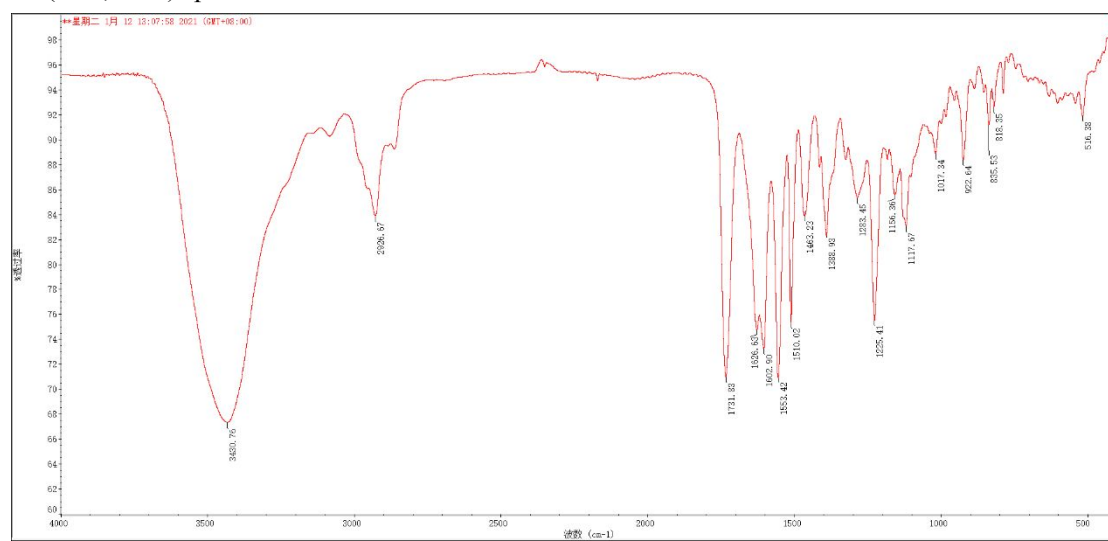

# HRMS spectrum of **6f**

Spectrum from SHL-2020-09-04-POS-84.wiff2 (sample 1) - SHL-2020-09-04-POS-84, Experiment 1, +IDA TOF MS (100 - 1000) from 0.404 min

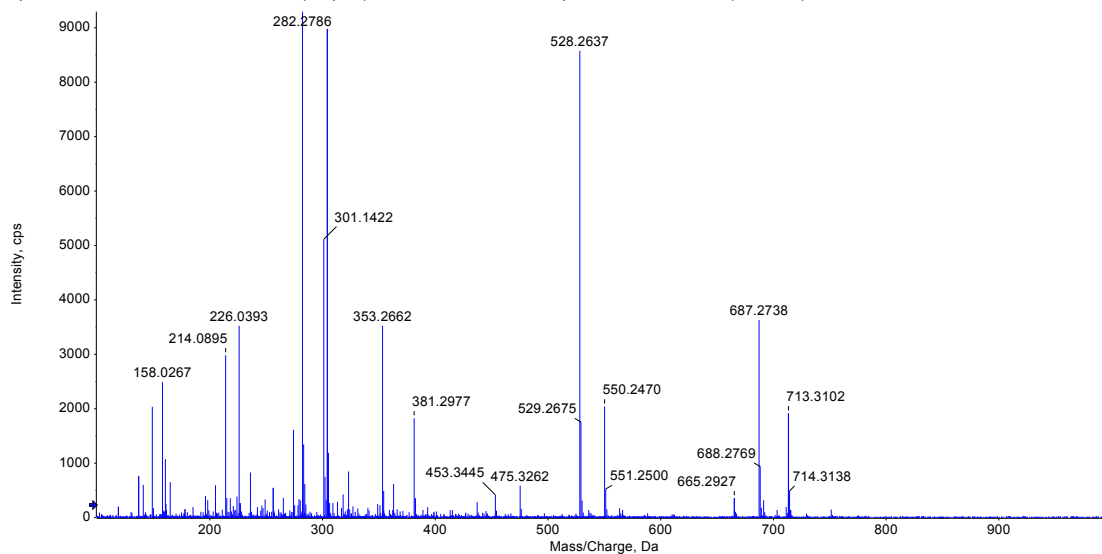

Spectrum from SHL-2020-09-04-POS-84.wiff2 (sample 1) - SHL-2020-09-04-POS-84, Experiment 1, +IDA TOF MS (100 - 1000) from 0.404 min

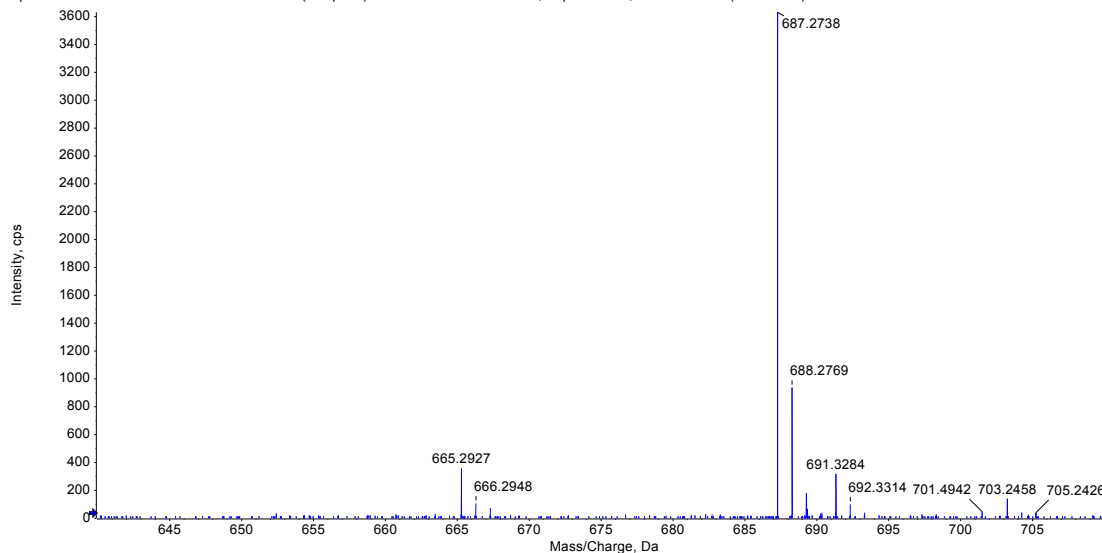

**Figure S15.** HPLC,  $^1\text{H}$  NMR,  $^{13}\text{C}$  NMR, HRMS and IR spectrum of final compound **6g**

HPLC spectrum of **6g**

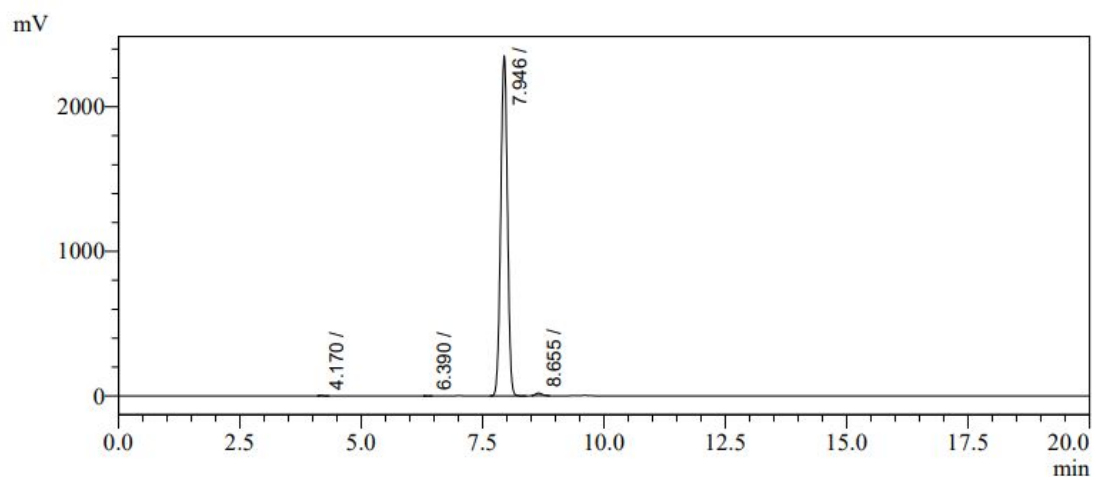

检测器A 254nm

| Peak# | Ret. Time | Height  | Area     | Area%  |
|-------|-----------|---------|----------|--------|
| 1     | 4.170     | 4193    | 20457    | 0.090  |
| 2     | 6.390     | 293     | 1478     | 0.006  |
| 3     | 7.946     | 2354660 | 22655930 | 99.197 |
| 4     | 8.655     | 17507   | 161517   | 0.707  |

$^1\text{H}$  NMR (400 MHz,  $\text{DMSO}-d_6$ ) spectrum of **6g**

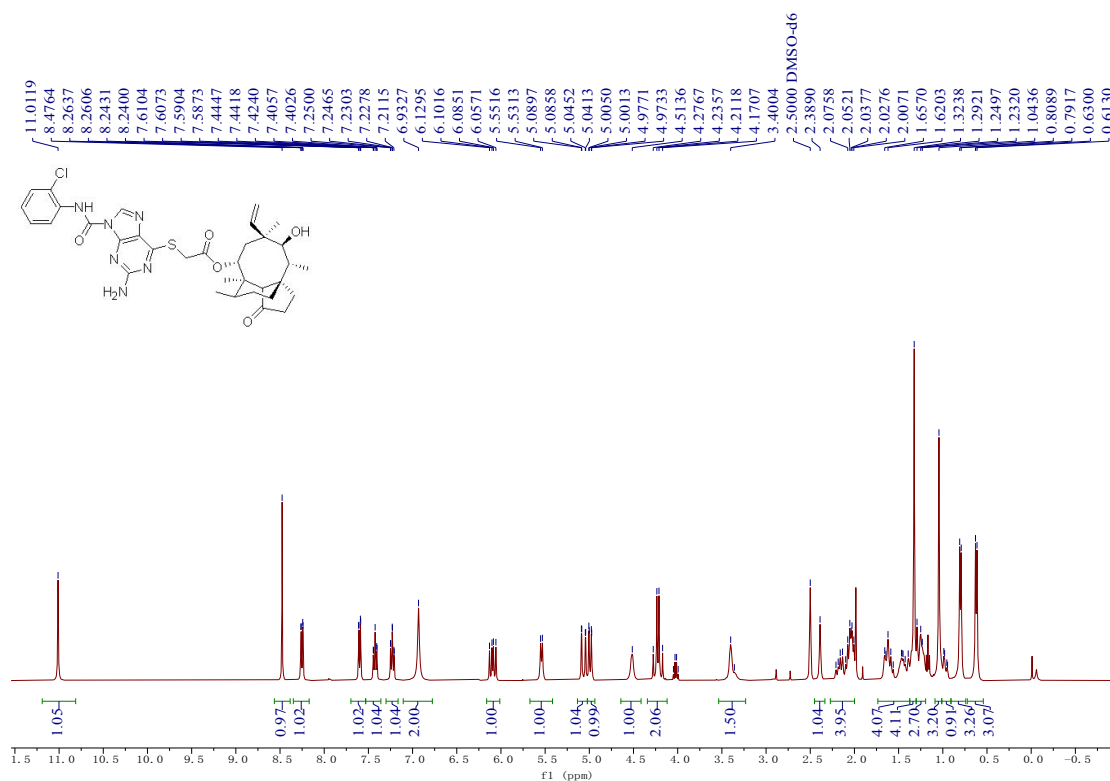



$^{13}\text{C}$  NMR (101 MHz,  $\text{DMSO-}d_6$ ) spectrum of **6g**

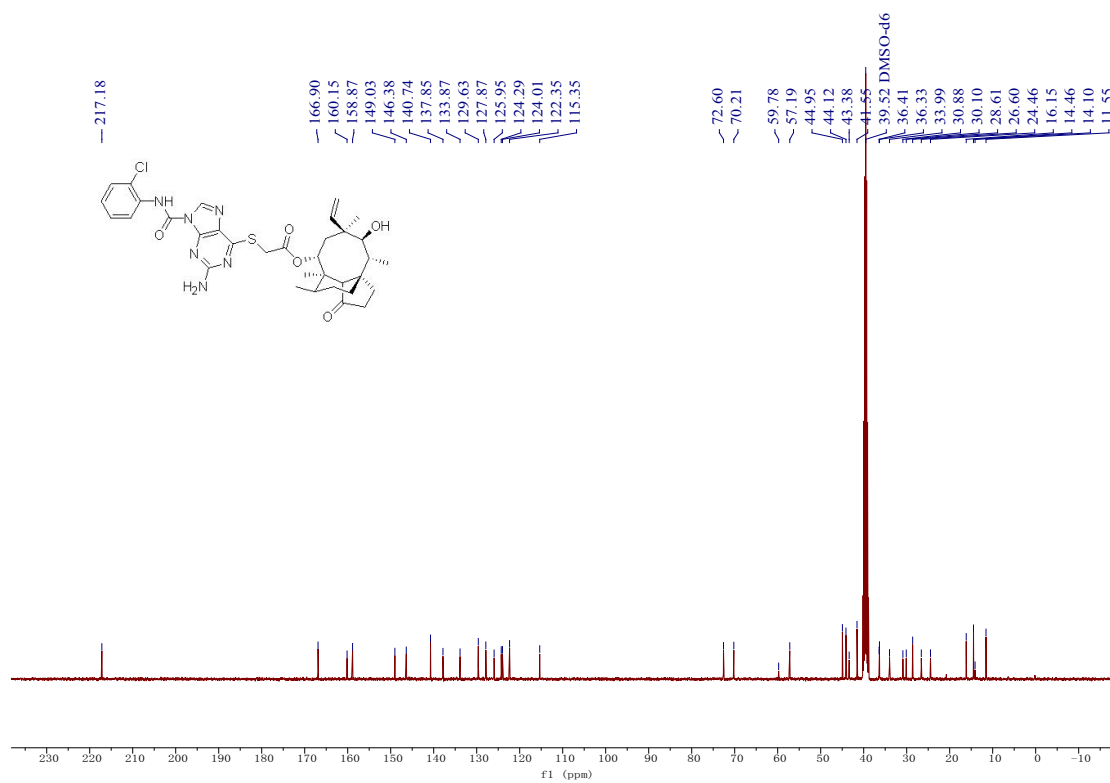

IR (KBr,  $\text{cm}^{-1}$ ) spectrum of **6g**

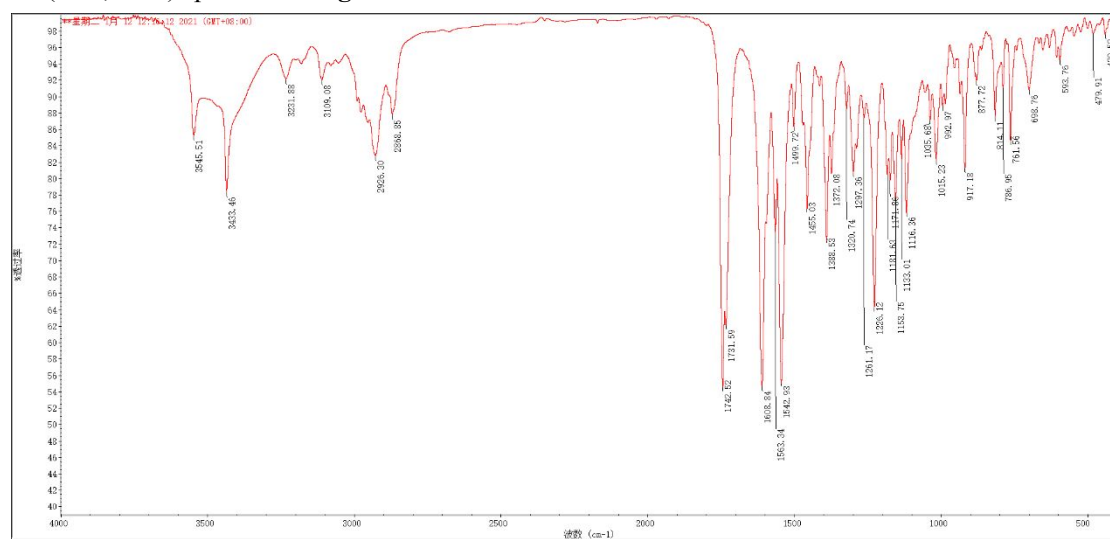

# HRMS spectrum of 6g

Spectrum from SHL-2020-09-04-POS-77.wiff2 (sample 1) - SHL-2020-09-04-POS-77, Experiment 1, +IDA TOF MS (100 - 1000) from 0.283 min

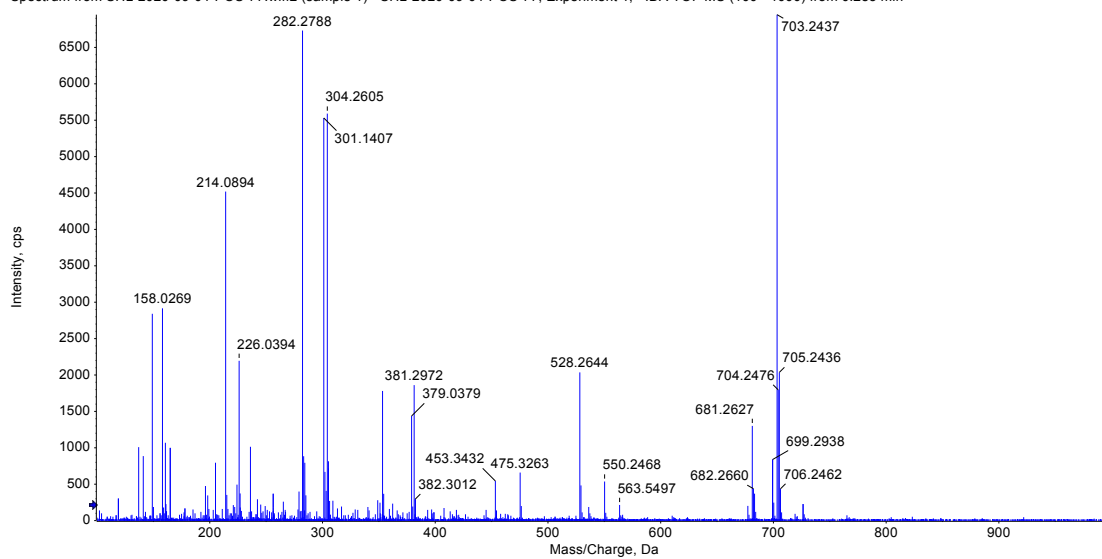

Spectrum from SHL-2020-09-04-POS-77.wiff2 (sample 1) - SHL-2020-09-04-POS-77, Experiment 1, +IDA TOF MS (100 - 1000) from 0.283 min

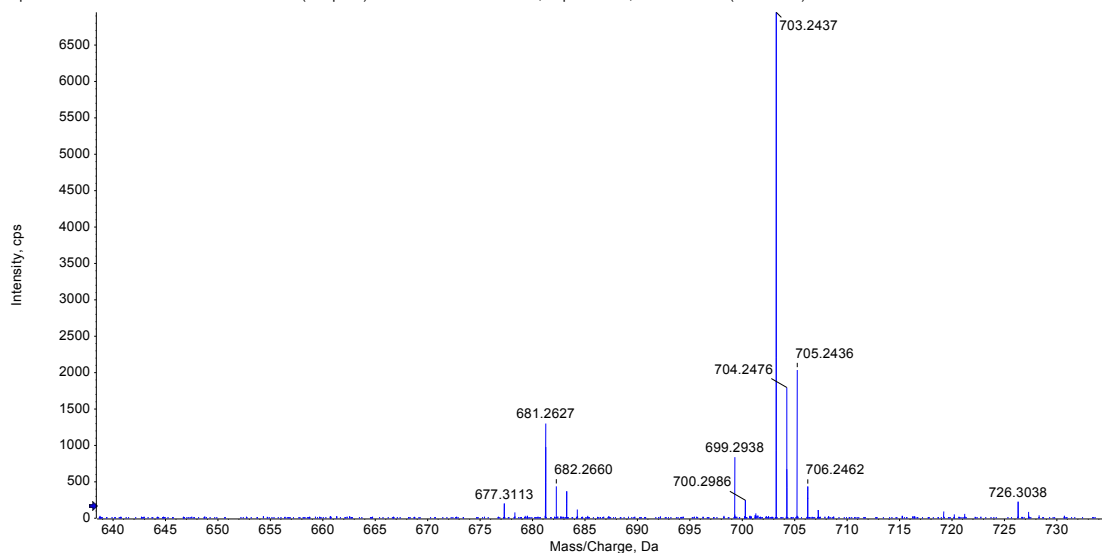

**Figure S16.** HPLC, <sup>1</sup>H NMR, <sup>13</sup>C NMR, HRMS and IR spectrum of final compound **6h**

HPLC spectrum of **6h**

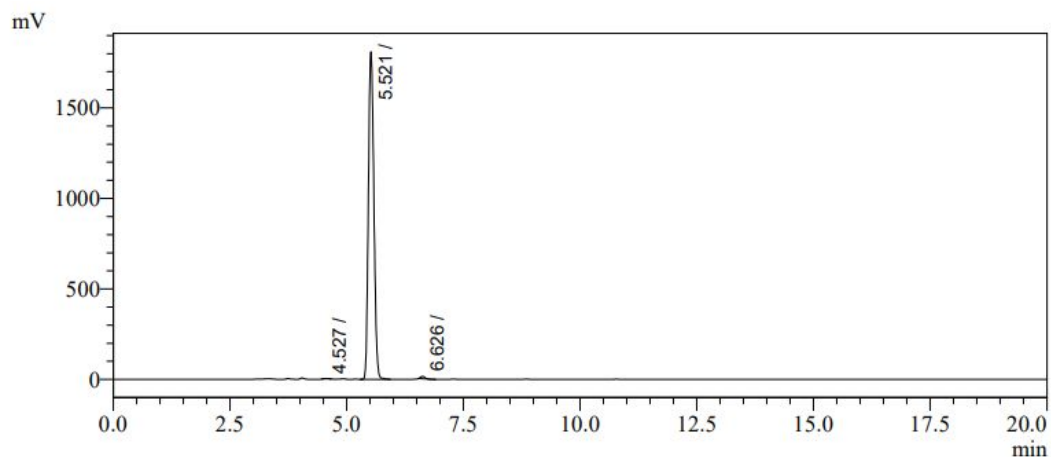

检测器A 254nm

| Peak# | Ret. Time | Height  | Area     | Area%  |
|-------|-----------|---------|----------|--------|
| 1     | 4.527     | 2204    | 16611    | 0.112  |
| 2     | 5.521     | 1808897 | 14716176 | 99.359 |
| 3     | 6.626     | 12656   | 78263    | 0.528  |

<sup>1</sup>H NMR (400 MHz, DMSO-*d*<sub>6</sub>) spectrum of **6h**

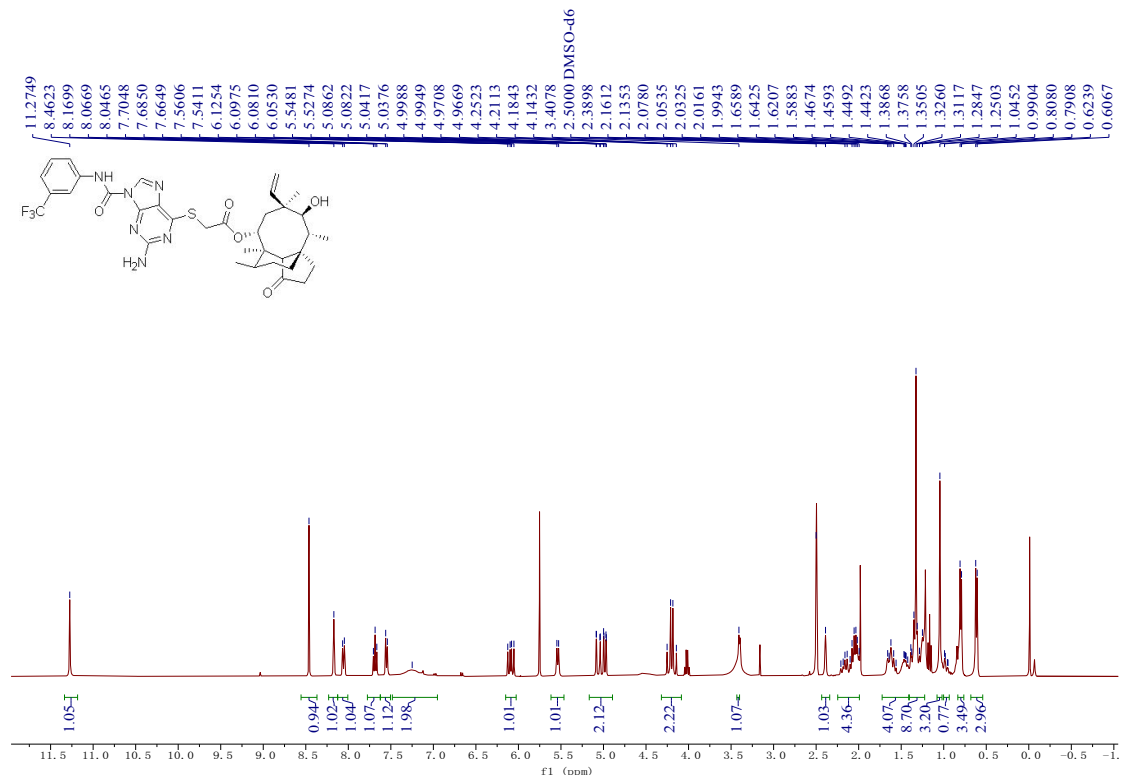

$^{13}\text{C}$  NMR (101 MHz,  $\text{DMSO-}d_6$ ) spectrum of **6h**

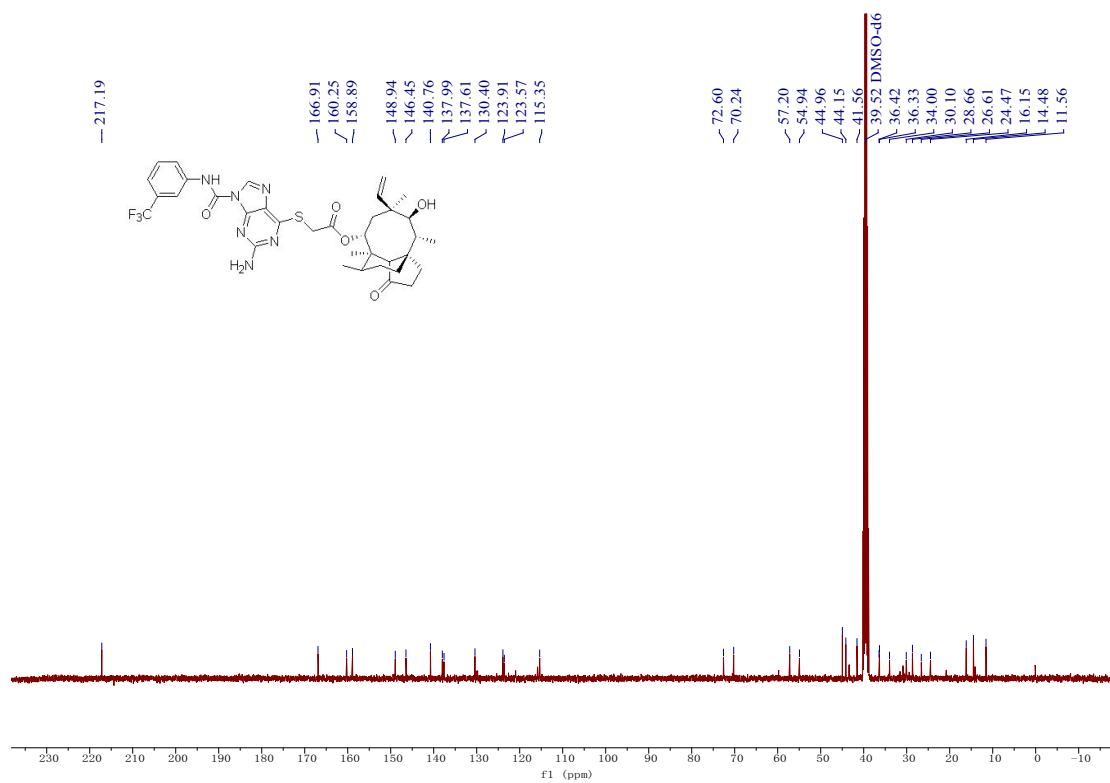

IR (KBr,  $\text{cm}^{-1}$ ) spectrum of **6h**

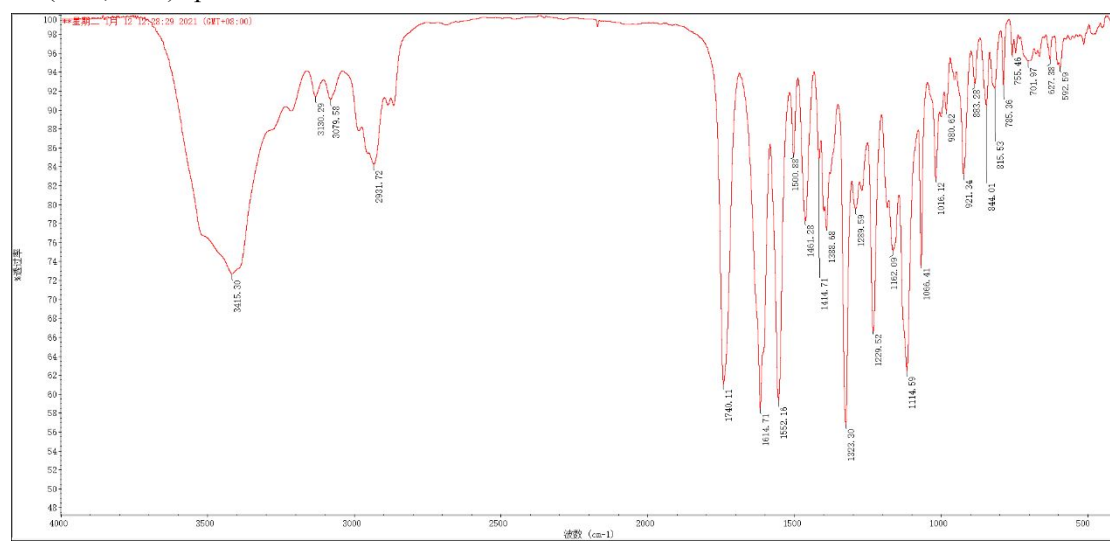

# HRMS spectrum of 6h

Spectrum from SHL-2020-09-28-POS-67.wiff2 (sample 1) - SHL-2020-09-28-POS-67, Experiment 1, +IDA TOF MS (100 - 800) from 0.256 min

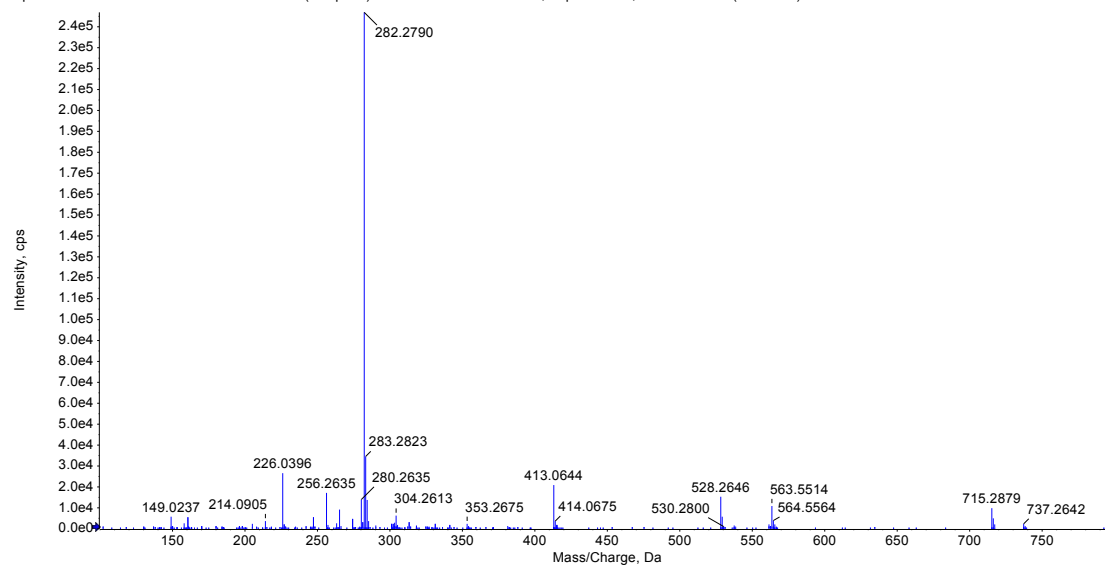

Spectrum from SHL-2020-09-28-POS-67.wiff2 (sample 1) - SHL-2020-09-28-POS-67, Experiment 1, +IDA TOF MS (100 - 800) from 0.256 min

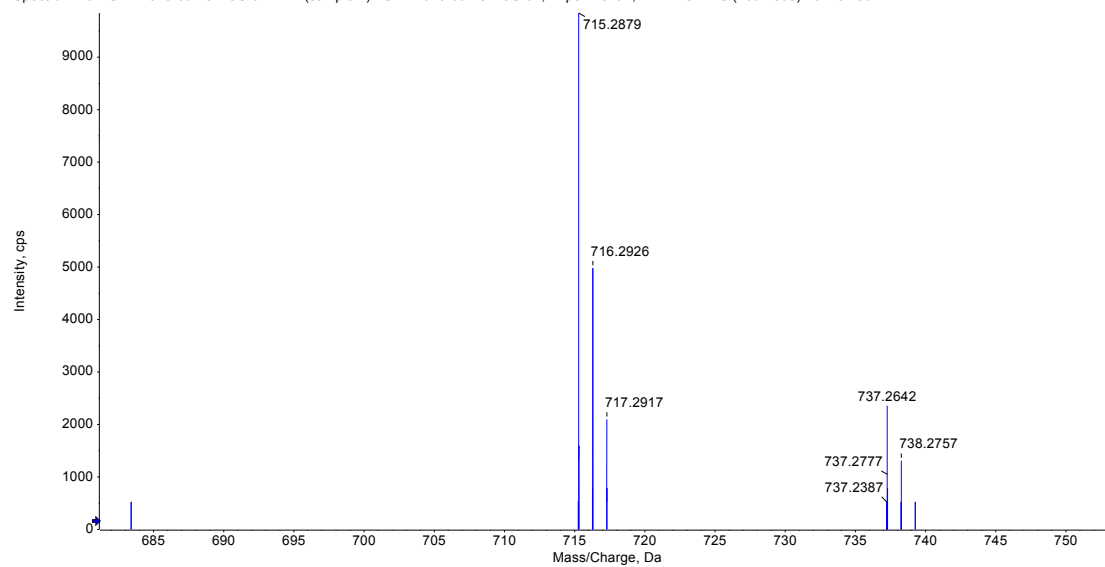

**Figure S17.** HPLC,  $^1\text{H}$  NMR,  $^{13}\text{C}$  NMR, HRMS and IR spectrum of final compound **6i**  
HPLC spectrum of **6i**

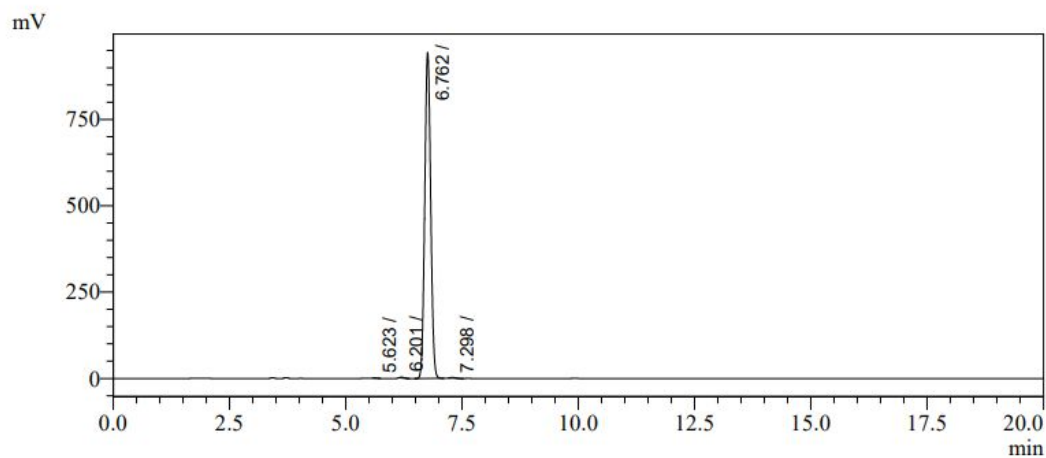

检测器A 254nm

| Peak# | Ret. Time | Height | Area    | Area%  |
|-------|-----------|--------|---------|--------|
| 1     | 5.623     | 425    | 1966    | 0.023  |
| 2     | 6.201     | 2084   | 12212   | 0.145  |
| 3     | 6.762     | 943392 | 8371542 | 99.629 |
| 4     | 7.298     | 2413   | 17031   | 0.203  |

$^1\text{H}$  NMR (400 MHz,  $\text{DMSO}-d_6$ ) spectrum of **6i**

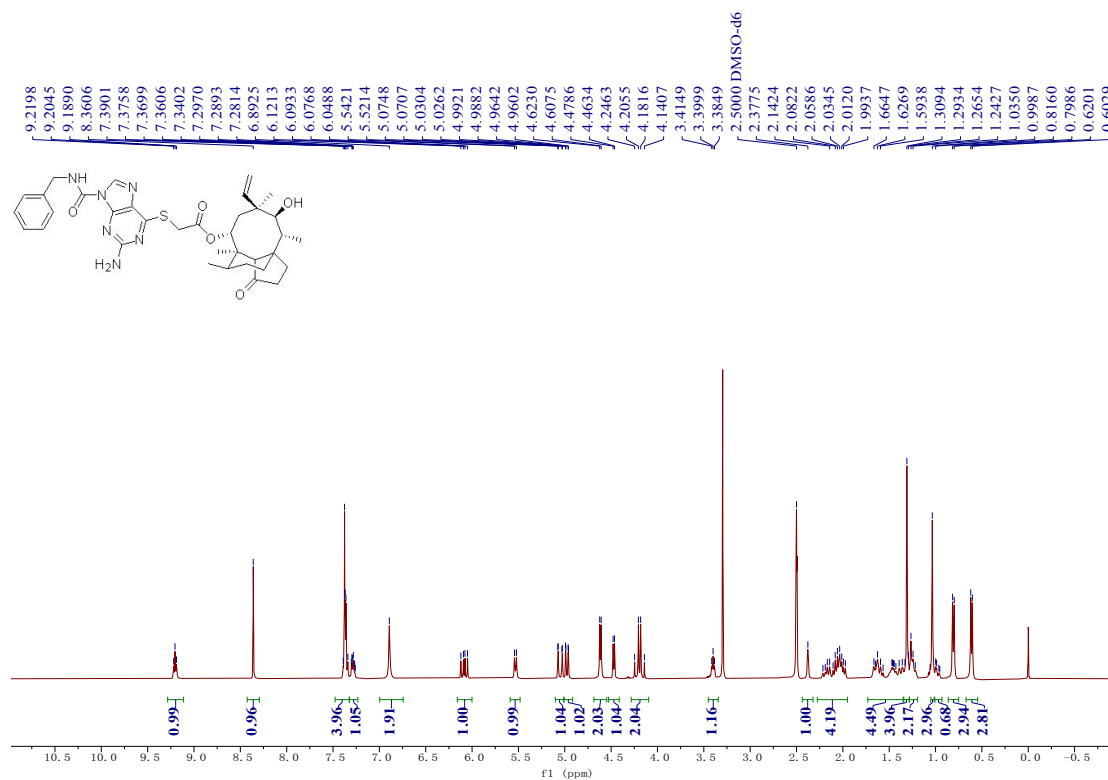

$^{13}\text{C}$  NMR (101 MHz,  $\text{DMSO-}d_6$ ) spectrum of **6i**

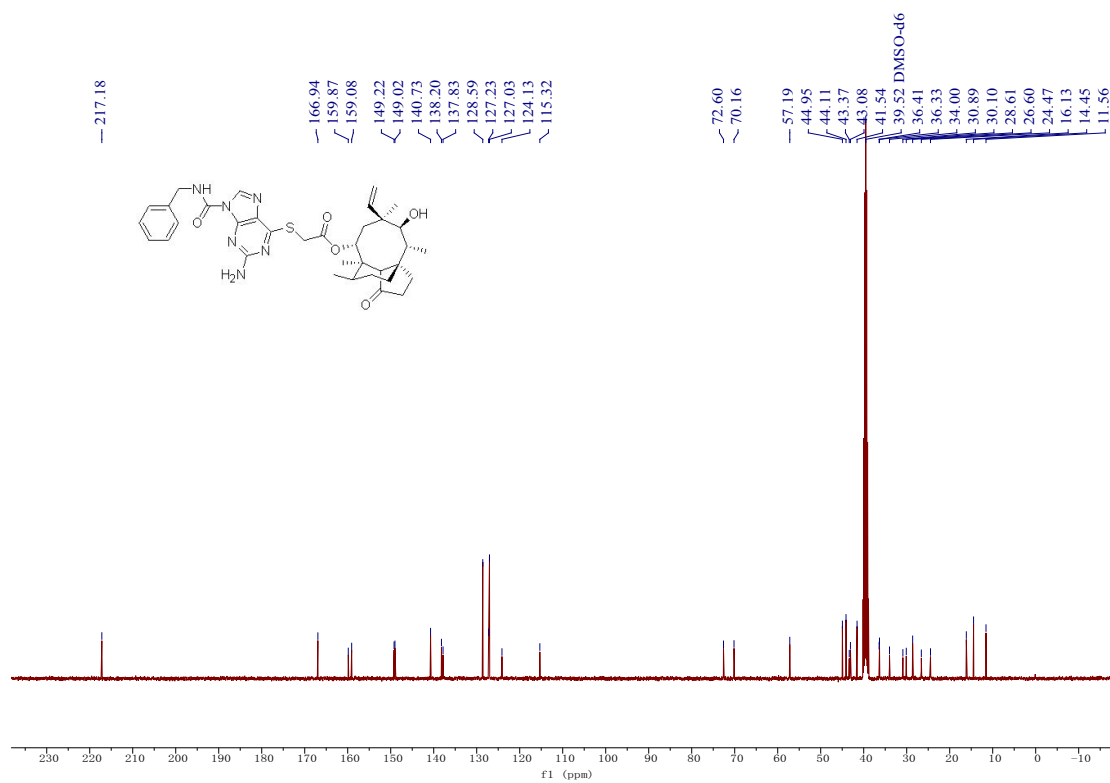

IR (KBr,  $\text{cm}^{-1}$ ) spectrum of **6i**

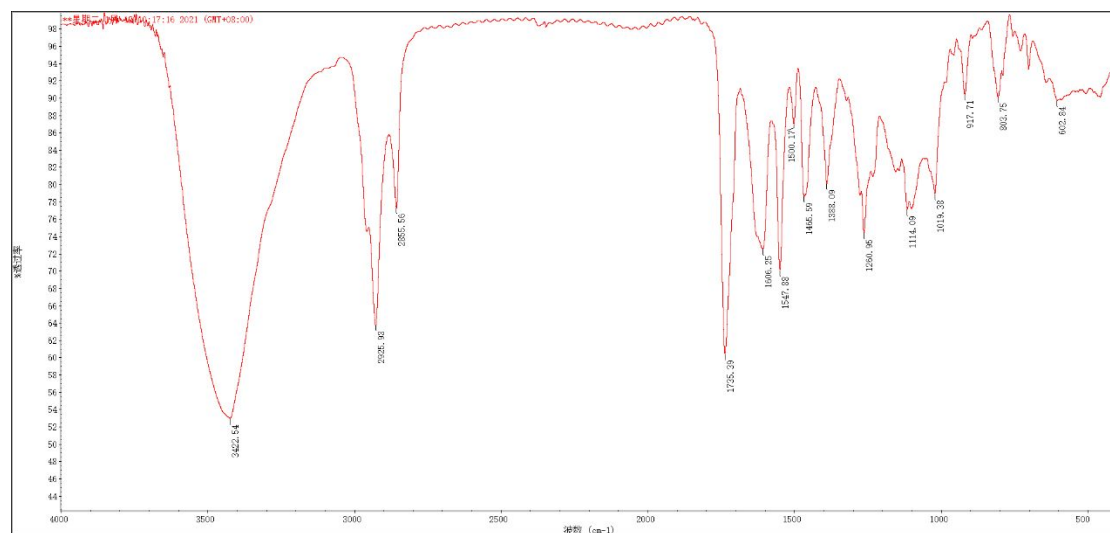

# HRMS spectrum of **6i**

Spectrum from SHL-2020-09-04-POS-74.wiff2 (sample 1) - SHL-2020-09-04-POS-74, Experiment 1, +IDA TOF MS (100 - 1000) from 0.534 min

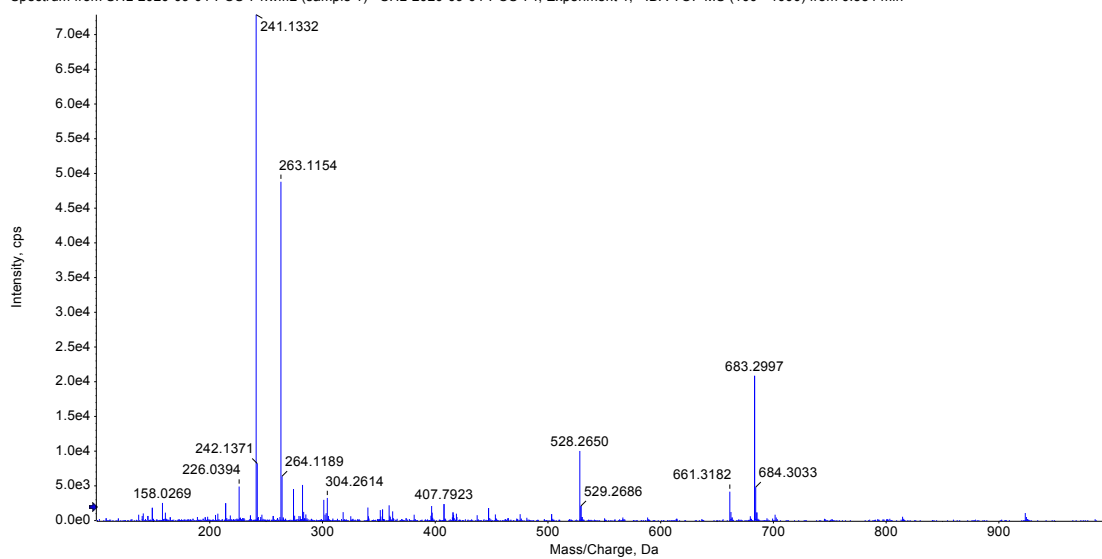

Spectrum from SHL-2020-09-04-POS-74.wiff2 (sample 1) - SHL-2020-09-04-POS-74, Experiment 1, +IDA TOF MS (100 - 1000) from 0.534 min

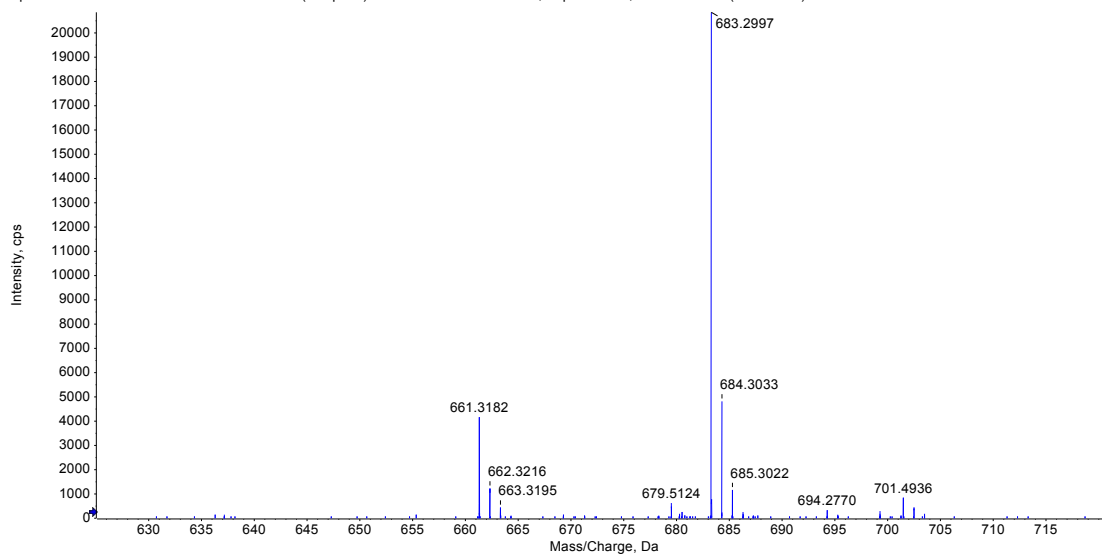



**Figure S18.** HPLC,  $^1\text{H}$  NMR,  $^{13}\text{C}$  NMR, HRMS and IR spectrum of final compound **6j**  
HPLC spectrum of **6j**

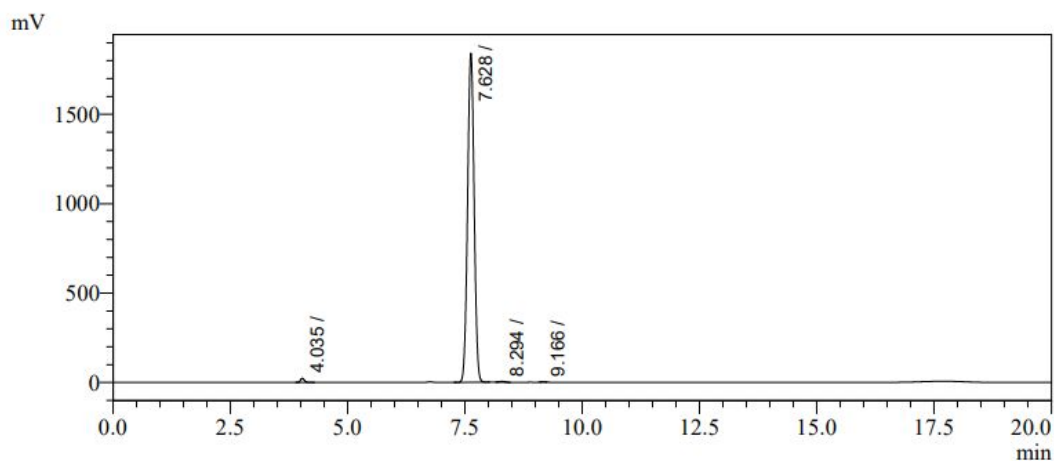

检测器A 254nm

| Peak# | Ret. Time | Height  | Area     | Area%  |
|-------|-----------|---------|----------|--------|
| 1     | 4.035     | 23462   | 130175   | 0.721  |
| 2     | 7.628     | 1839597 | 17865849 | 99.011 |
| 3     | 8.294     | 5028    | 43146    | 0.239  |
| 4     | 9.166     | 1073    | 5185     | 0.029  |

$^1\text{H}$  NMR (400 MHz,  $\text{DMSO}-d_6$ ) spectrum of **6j**

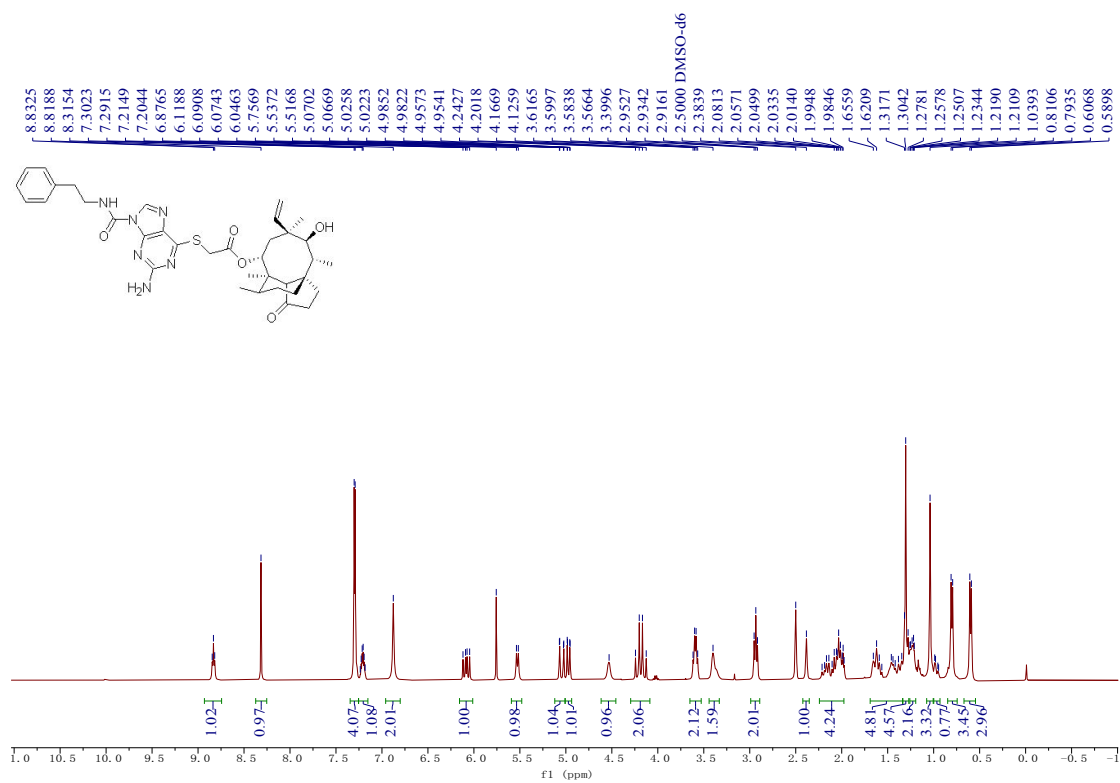

$^{13}\text{C}$  NMR (101 MHz,  $\text{DMSO-}d_6$ ) spectrum of **6j**

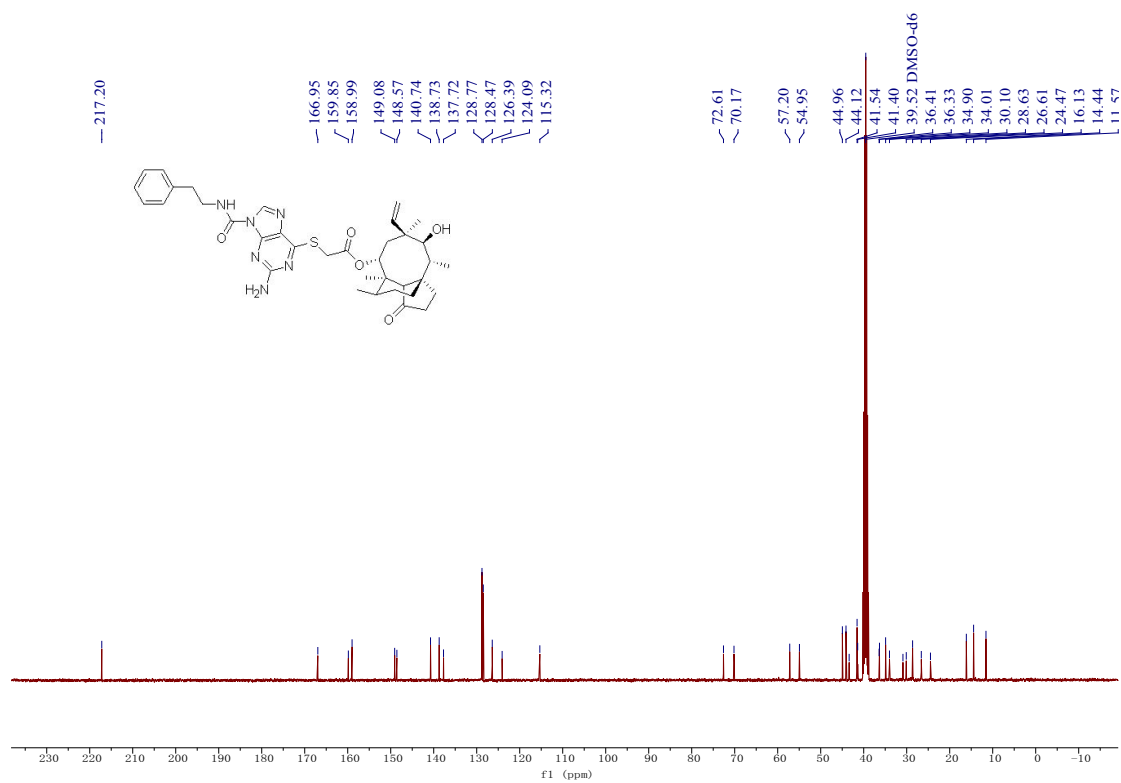

IR (KBr,  $\text{cm}^{-1}$ ) spectrum of **6j**

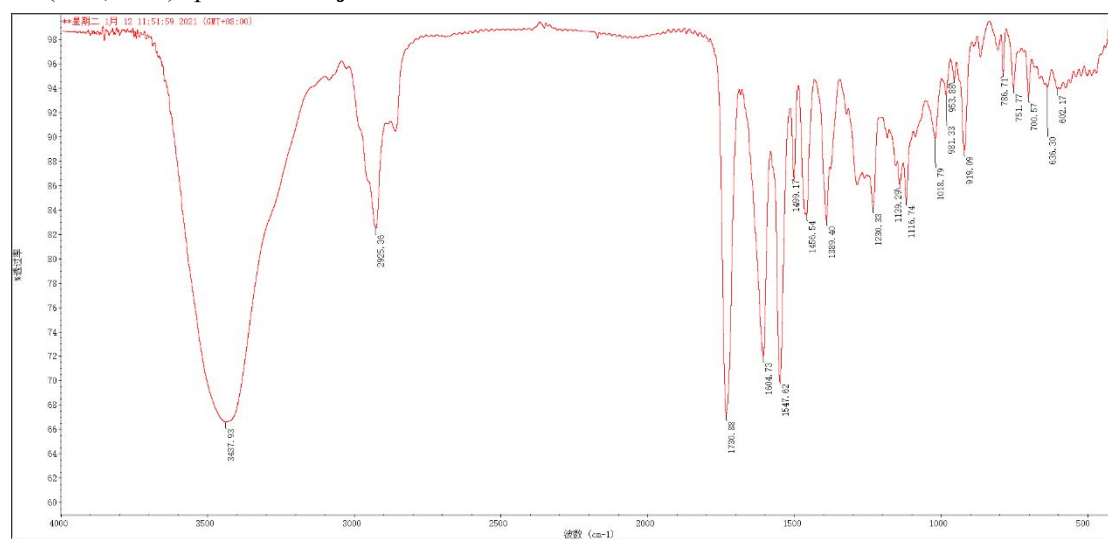

# HRMS spectrum of 6j

Spectrum from SHL-2020-09-04-POS-65.wiff2 (sample 1) - SHL-2020-09-04-POS-65, Experiment 1, +IDA TOF MS (100 - 1000) from 0.496 min

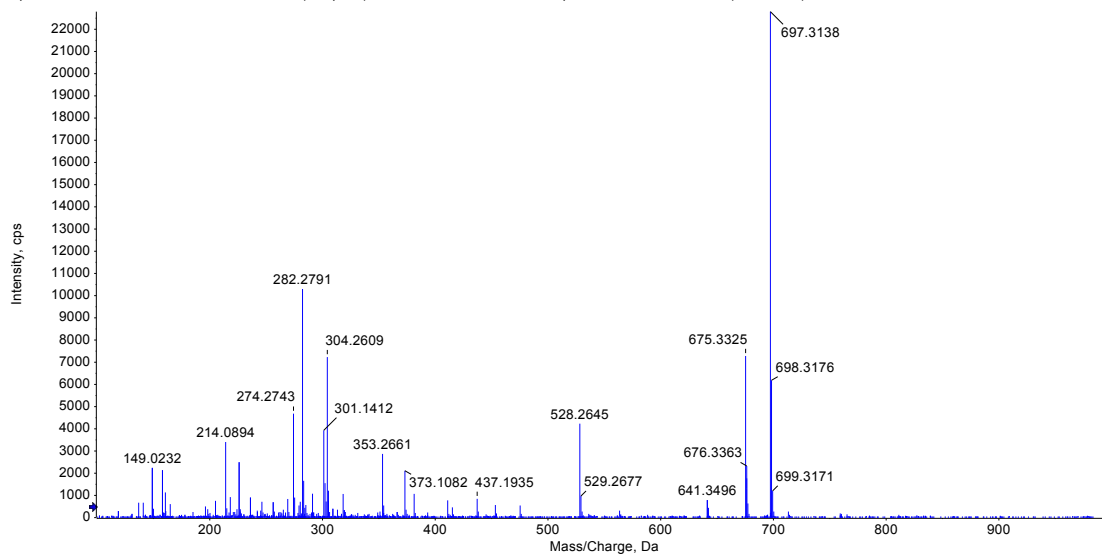

Spectrum from SHL-2020-09-04-POS-65.wiff2 (sample 1) - SHL-2020-09-04-POS-65, Experiment 1, +IDA TOF MS (100 - 1000) from 0.496 min

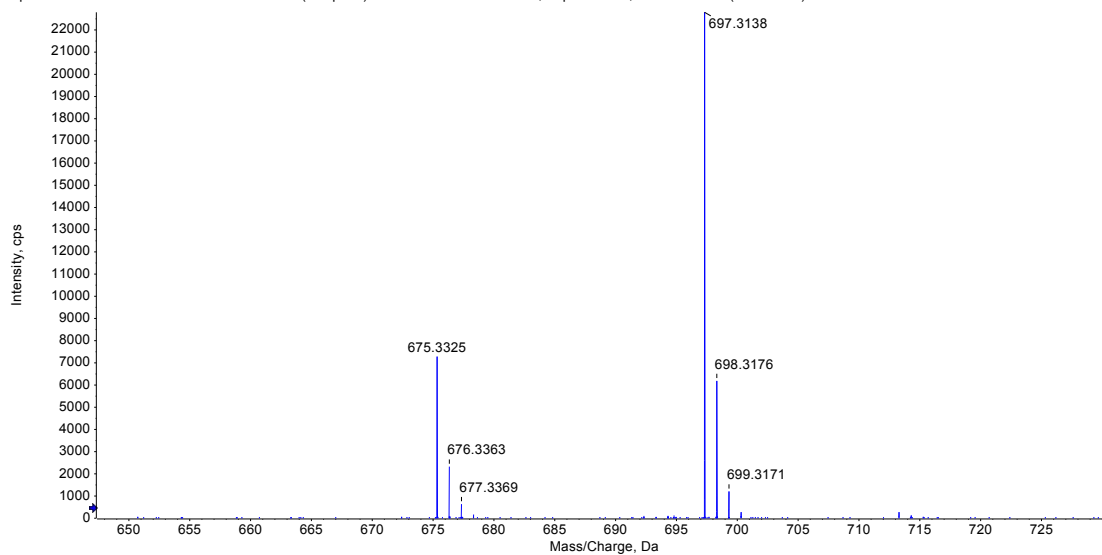

**Figure S19.** HPLC,  $^1\text{H}$  NMR,  $^{13}\text{C}$  NMR, HRMS and IR spectrum of final compound **6k**

HPLC spectrum of **6k**

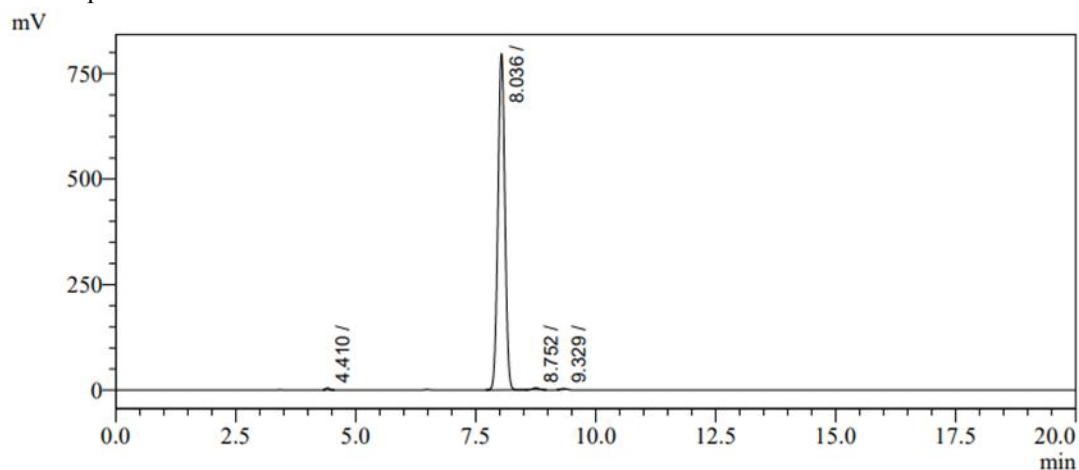

检测器A 254nm

| Peak# | Ret. Time | Height | Area    | Area%  |
|-------|-----------|--------|---------|--------|
| 1     | 4.410     | 4309   | 24994   | 0.309  |
| 2     | 8.036     | 796190 | 8010281 | 99.155 |
| 3     | 8.752     | 3666   | 31996   | 0.396  |
| 4     | 9.329     | 1588   | 11314   | 0.140  |

$^1\text{H}$  NMR (400 MHz,  $\text{DMSO}-d_6$ ) spectrum of **6k**

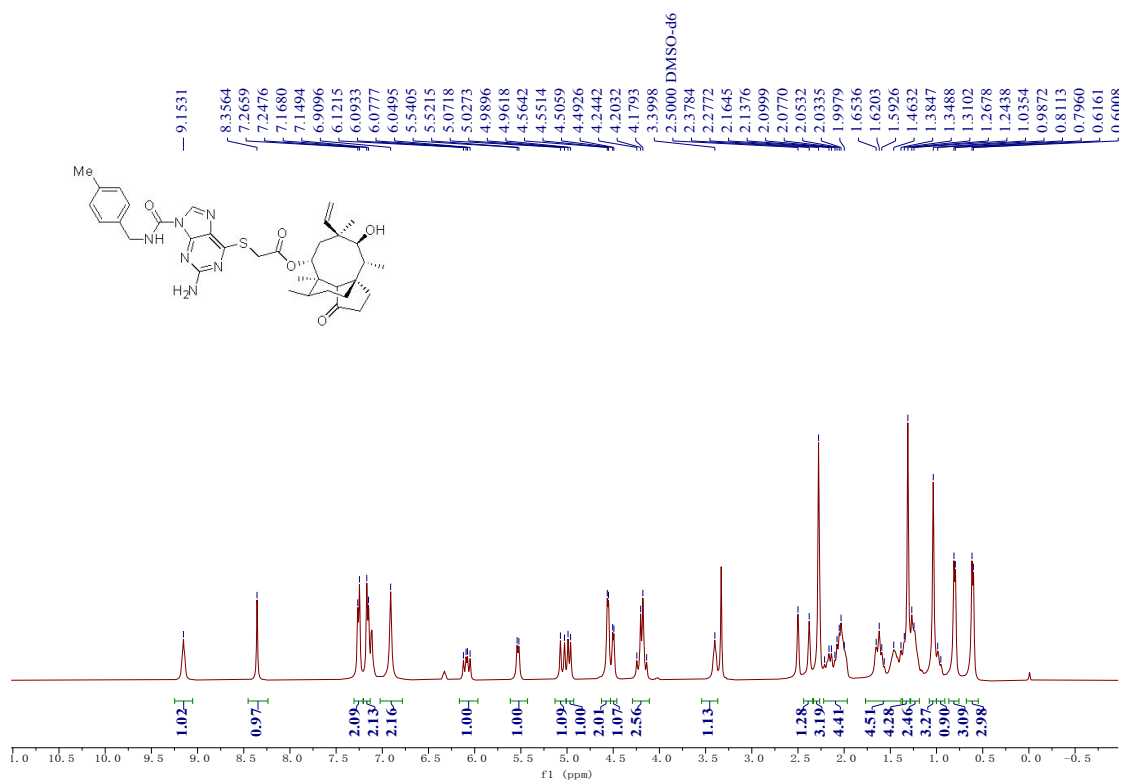

$^{13}\text{C}$  NMR (101 MHz,  $\text{DMSO-}d_6$ ) spectrum of **6k**

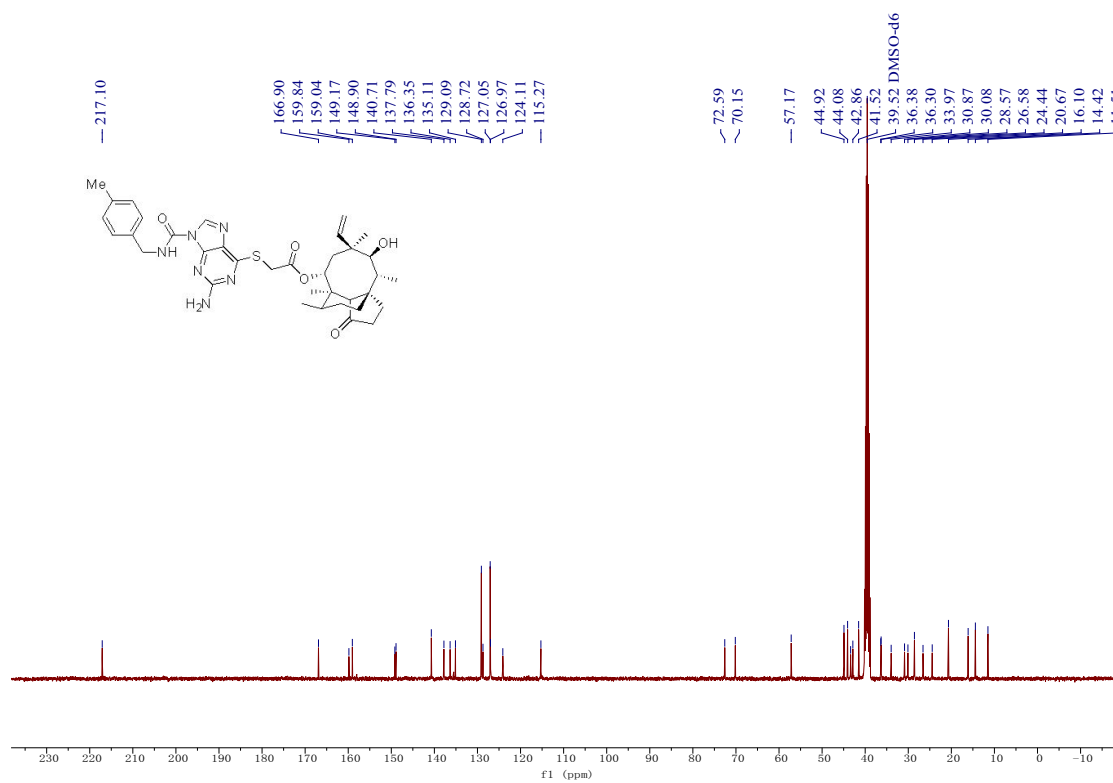

IR (KBr,  $\text{cm}^{-1}$ ) spectrum of **6k**

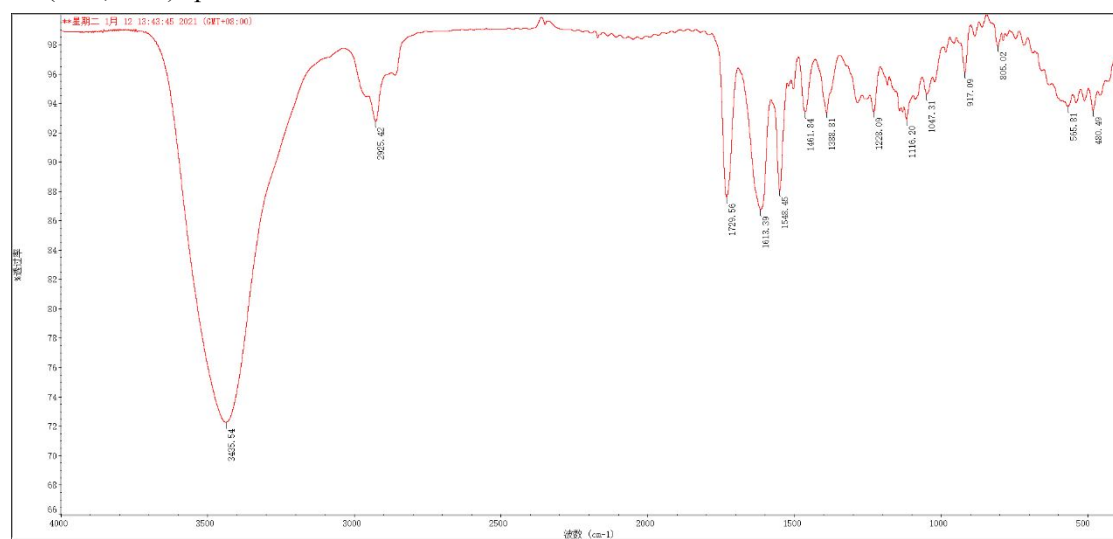

# HRMS spectrum of 6k

Spectrum from SHL-2020-09-04-POS-79.wiff2 (sample 1) - SHL-2020-09-04-POS-79, Experiment 1, +IDA TOF MS (100 - 1000) from 0.476 min

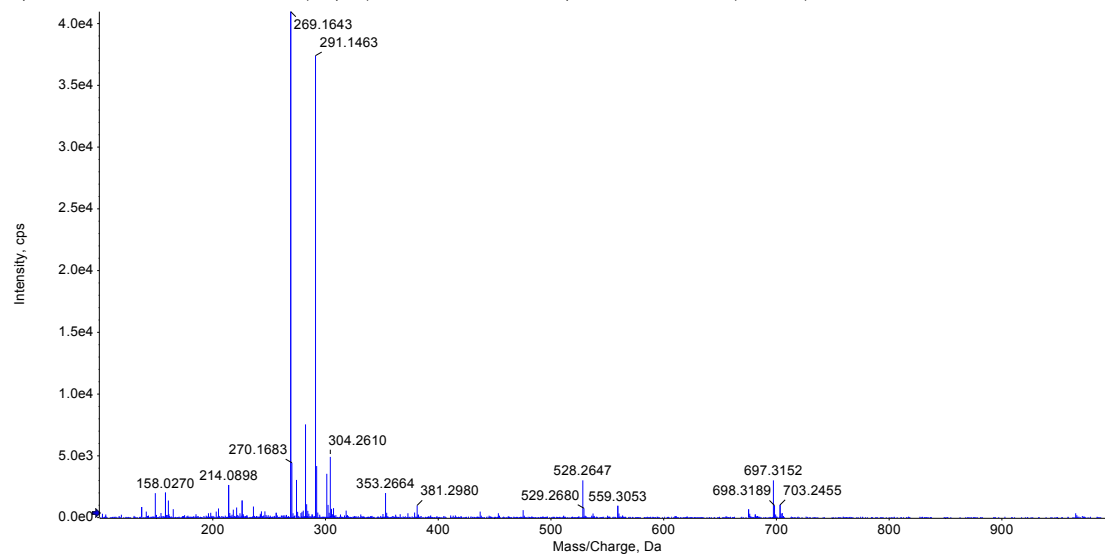

Spectrum from SHL-2020-09-04-POS-79.wiff2 (sample 1) - SHL-2020-09-04-POS-79, Experiment 1, +IDA TOF MS (100 - 1000) from 0.476 min

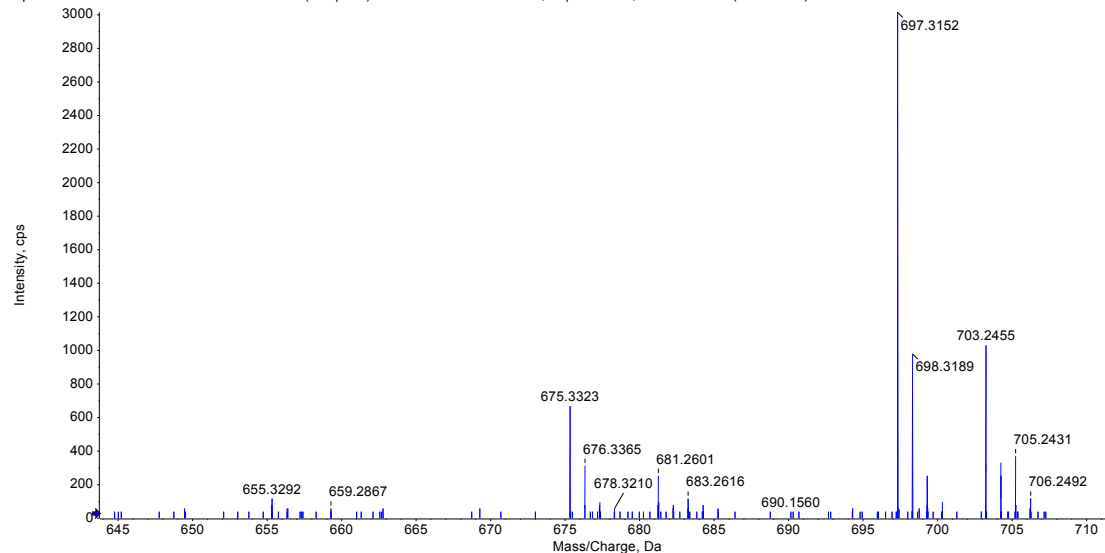

**Figure S20.** HPLC,  $^1\text{H}$  NMR,  $^{13}\text{C}$  NMR, HRMS and IR spectrum of final compound **61**

HPLC spectrum of **61**

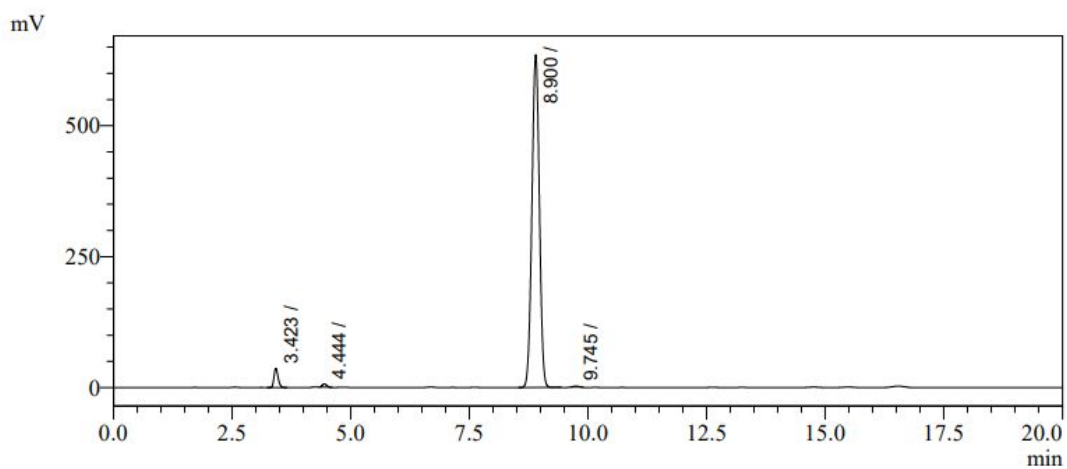

检测器A 254nm

| Peak# | Ret. Time | Height | Area    | Area%  |
|-------|-----------|--------|---------|--------|
| 1     | 3.423     | 36373  | 218109  | 3.027  |
| 2     | 4.444     | 6141   | 39877   | 0.553  |
| 3     | 8.900     | 634715 | 6936278 | 96.250 |
| 4     | 9.745     | 1630   | 12253   | 0.170  |

$^1\text{H}$  NMR (400 MHz,  $\text{DMSO}-d_6$ ) spectrum of **61**

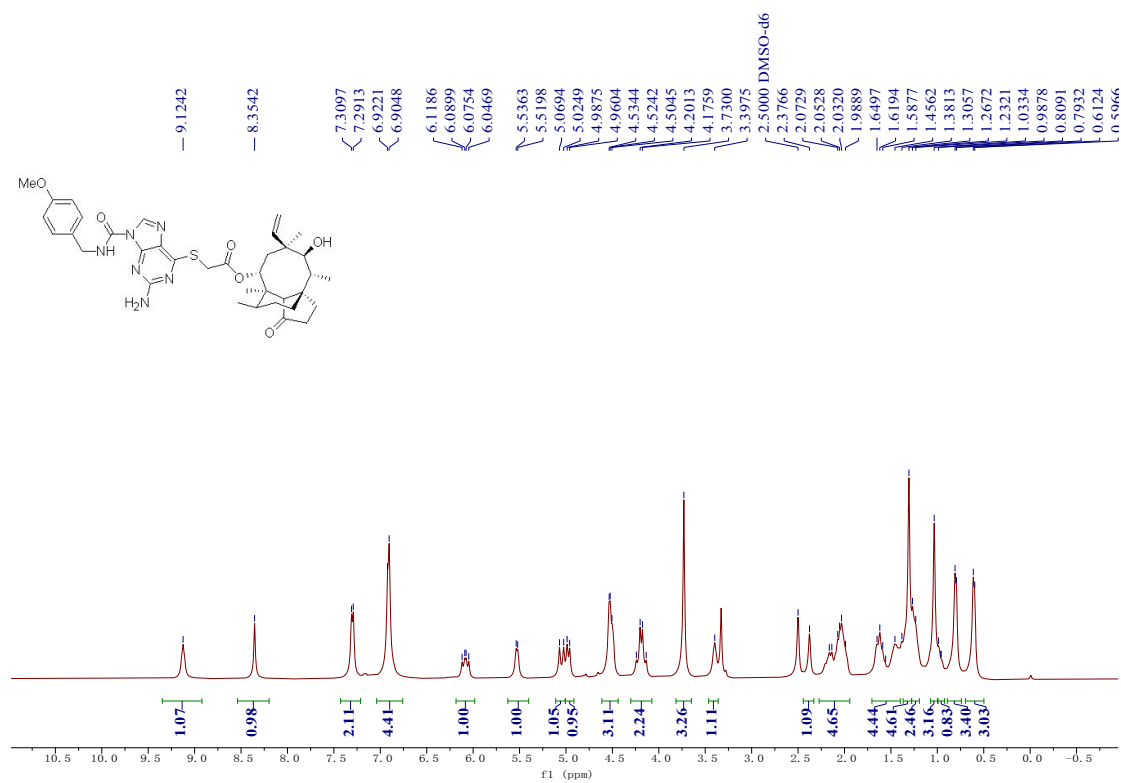

$^{13}\text{C}$  NMR (101 MHz,  $\text{DMSO-}d_6$ ) spectrum of **61**

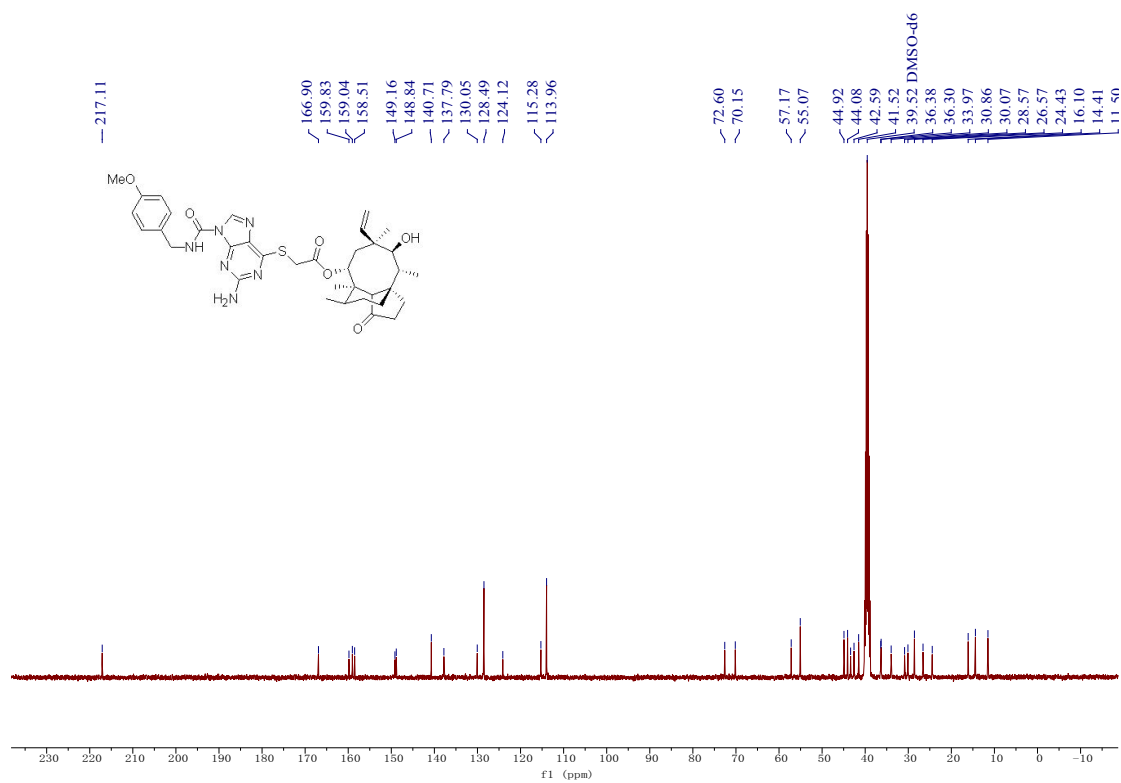

IR (KBr,  $\text{cm}^{-1}$ ) spectrum of **61**

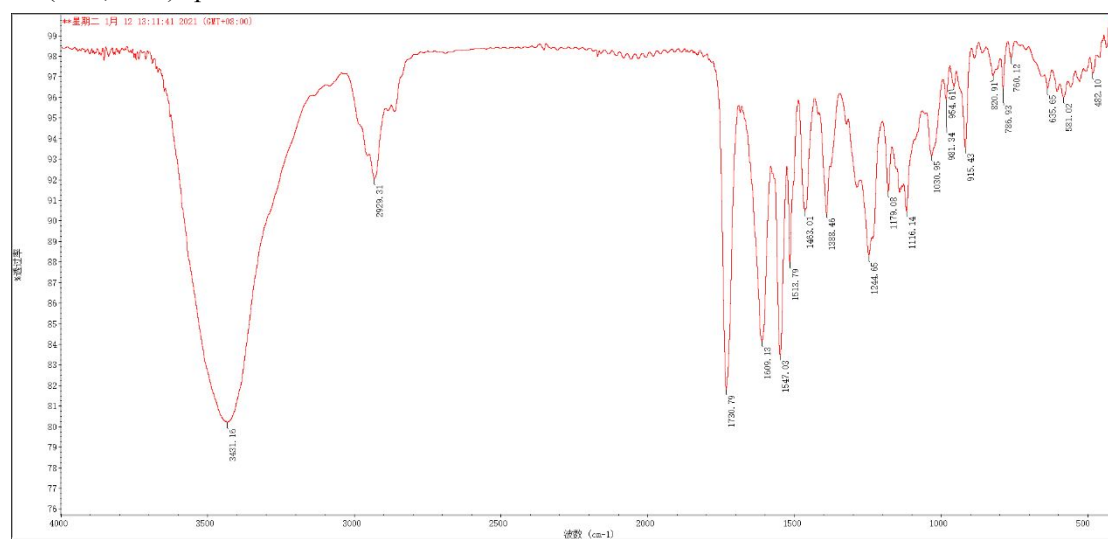



# HRMS spectrum of **6l**

Spectrum from SHL-2020-09-04-POS-63.wiff2 (sample 1) - SHL-2020-09-04-POS-63, Experiment 1, +IDA TOF MS (100 - 1000) from 0.581 min

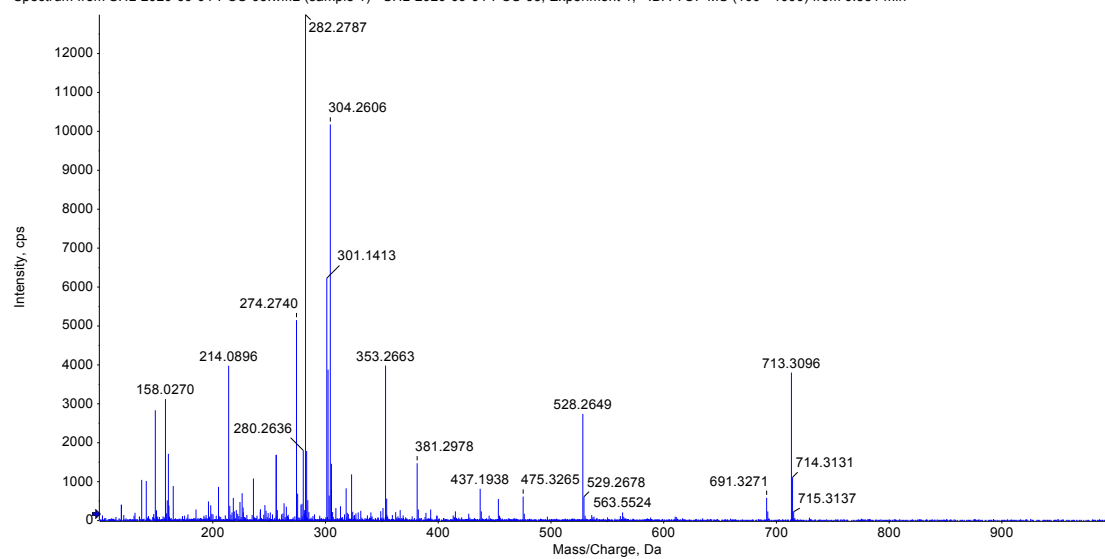

Spectrum from SHL-2020-09-04-POS-63.wiff2 (sample 1) - SHL-2020-09-04-POS-63, Experiment 1, +IDA TOF MS (100 - 1000) from 0.581 min

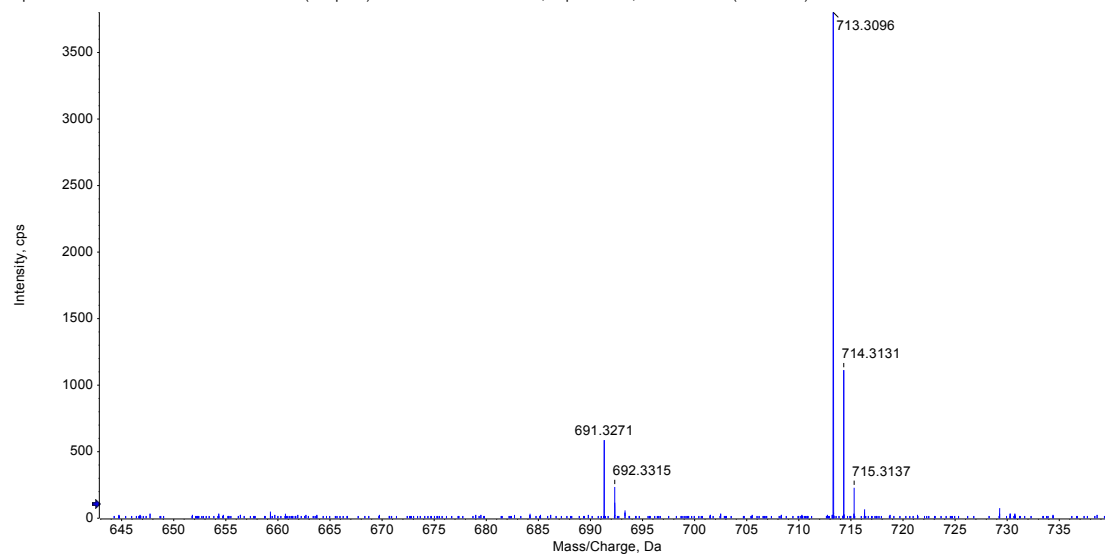

**Figure S21.** HPLC,  $^1\text{H}$  NMR,  $^{13}\text{C}$  NMR, HRMS and IR spectrum of final compound **6m**  
HPLC spectrum of **6m**

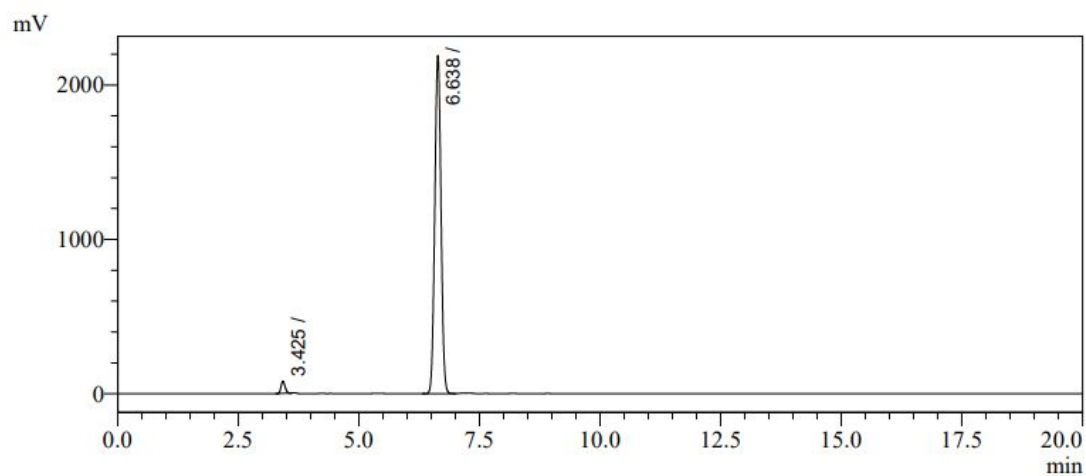

检测器A 254nm

| Peak# | Ret. Time | Height  | Area     | Area%  |
|-------|-----------|---------|----------|--------|
| 1     | 3.425     | 77845   | 426453   | 2.128  |
| 2     | 6.638     | 2190551 | 19616998 | 97.872 |

$^1\text{H}$  NMR (400 MHz,  $\text{DMSO-}d_6$ ) spectrum of **6m**

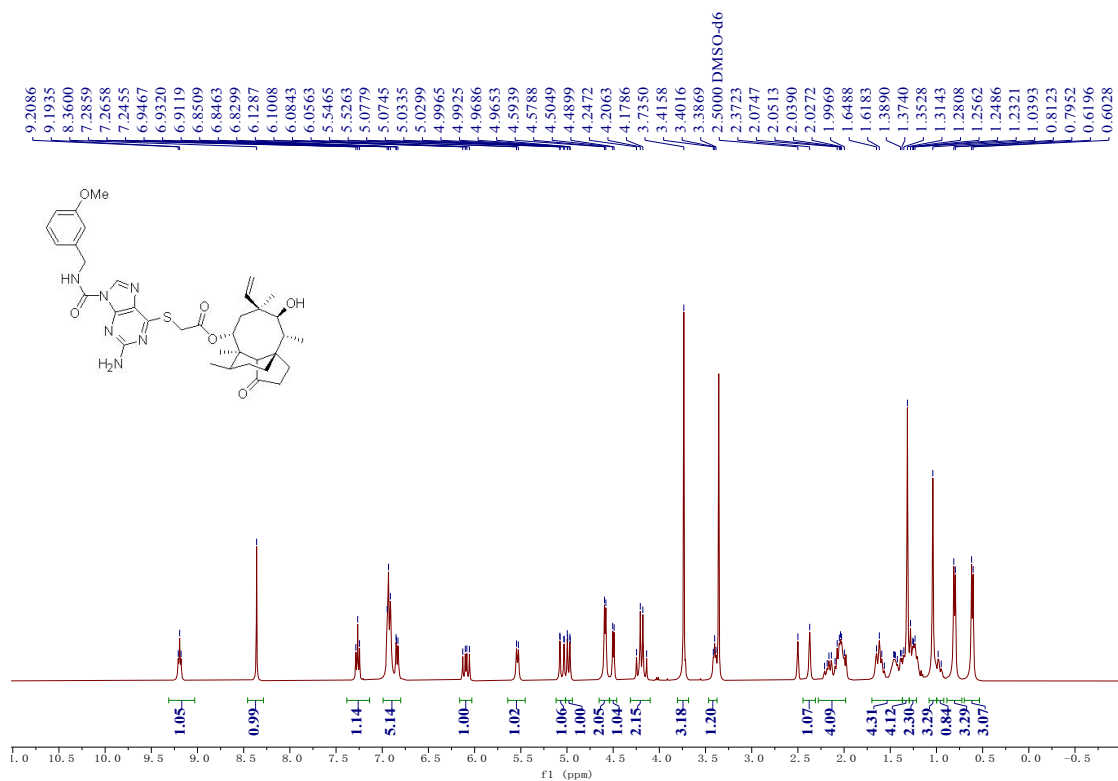

$^{13}\text{C}$  NMR (101 MHz,  $\text{DMSO-}d_6$ ) spectrum of **6m**

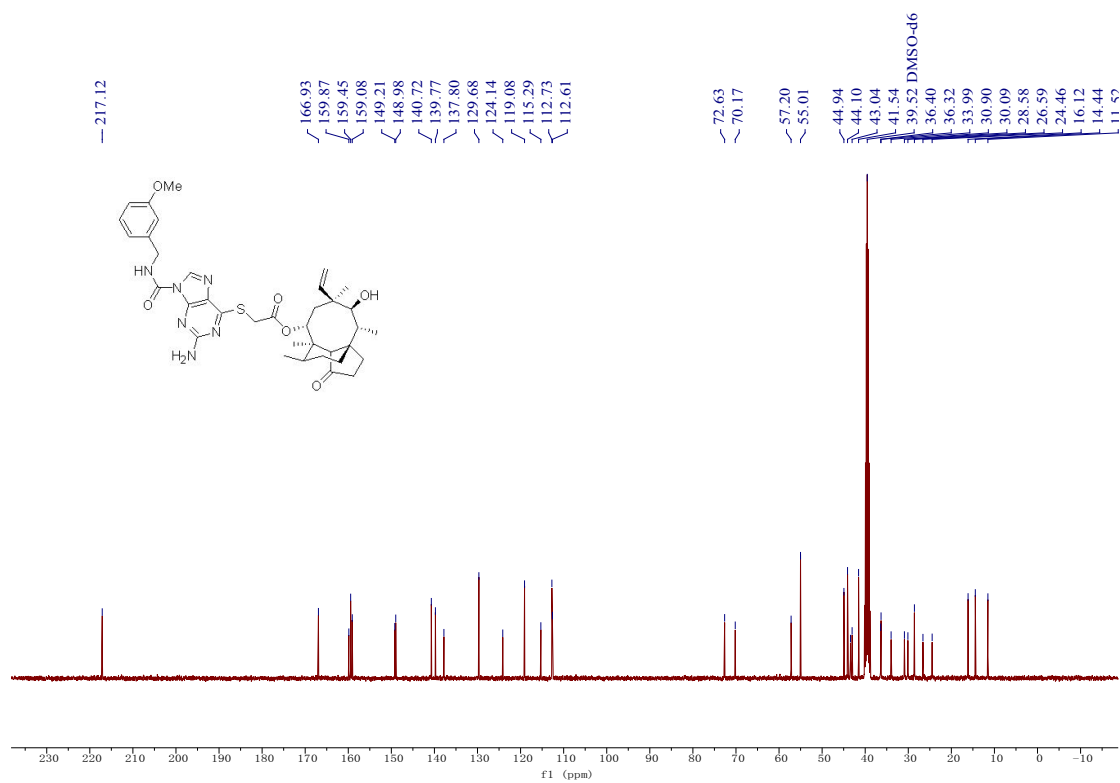

IR (KBr,  $\text{cm}^{-1}$ ) spectrum of **6m**

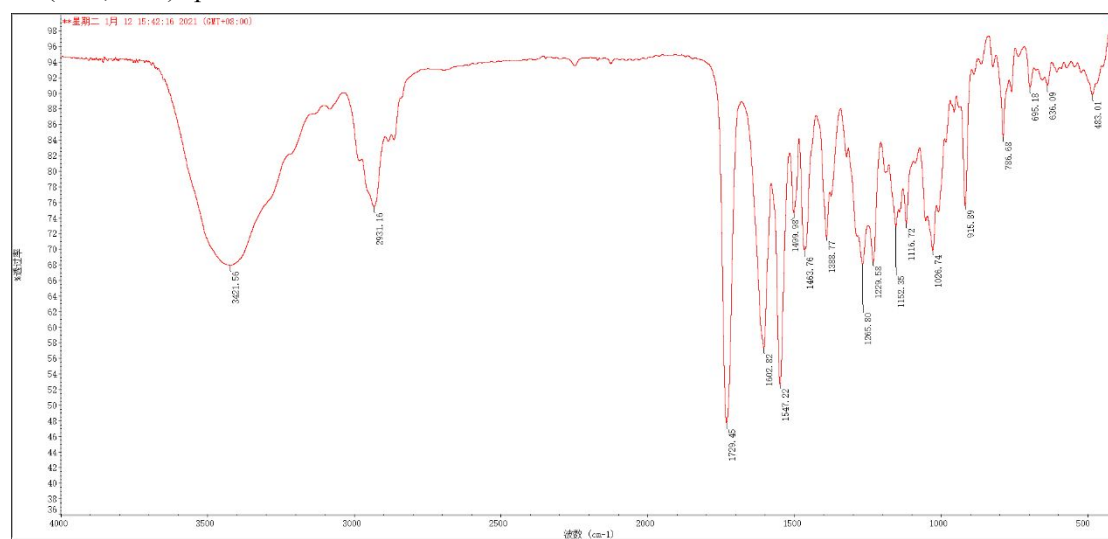

# HRMS spectrum of **6m**

Spectrum from SHL-2020-09-04-POS-83.wiff2 (sample 1) - SHL-2020-09-04-POS-83, Experiment 1, +IDA TOF MS (100 - 1000) from 0.147 to 1.159 min

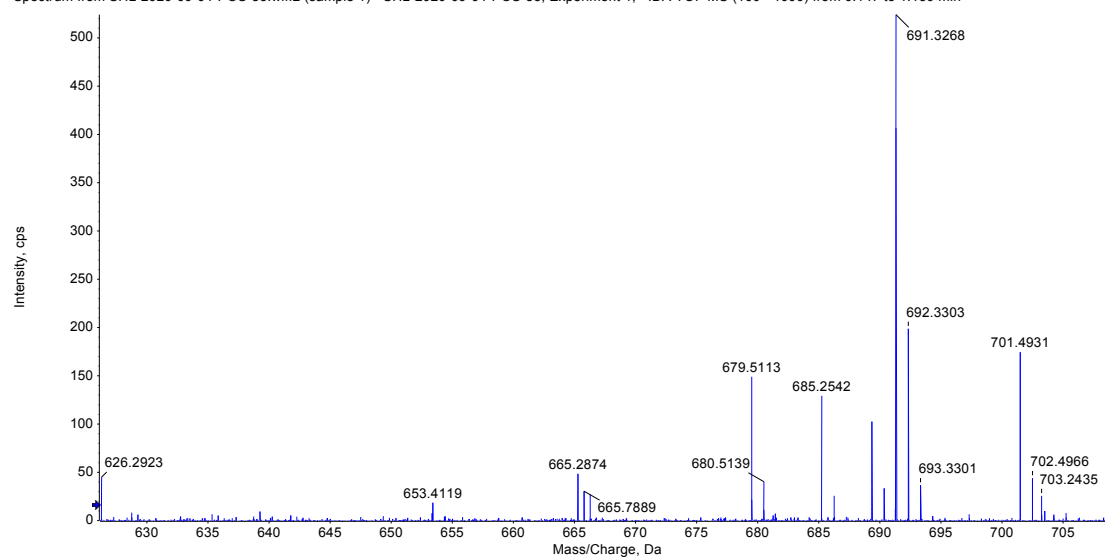

**Figure S22.** HPLC,  $^1\text{H}$  NMR,  $^{13}\text{C}$  NMR, HRMS and IR spectrum of final compound **6n**  
HPLC spectrum of **6n**

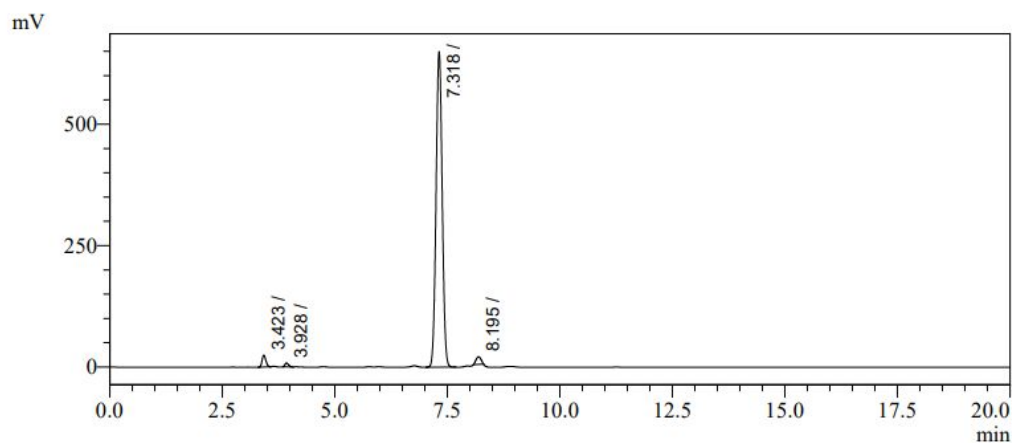

检测器A 254nm

| Peak# | Ret. Time | Height | Area    | Area%  |
|-------|-----------|--------|---------|--------|
| 1     | 3.423     | 24341  | 142112  | 2.203  |
| 2     | 3.928     | 7819   | 45004   | 0.698  |
| 3     | 7.318     | 648440 | 6144271 | 95.231 |
| 4     | 8.195     | 15540  | 120595  | 1.869  |

$^1\text{H}$  NMR (400 MHz,  $\text{DMSO}-d_6$ ) spectrum of **6n**

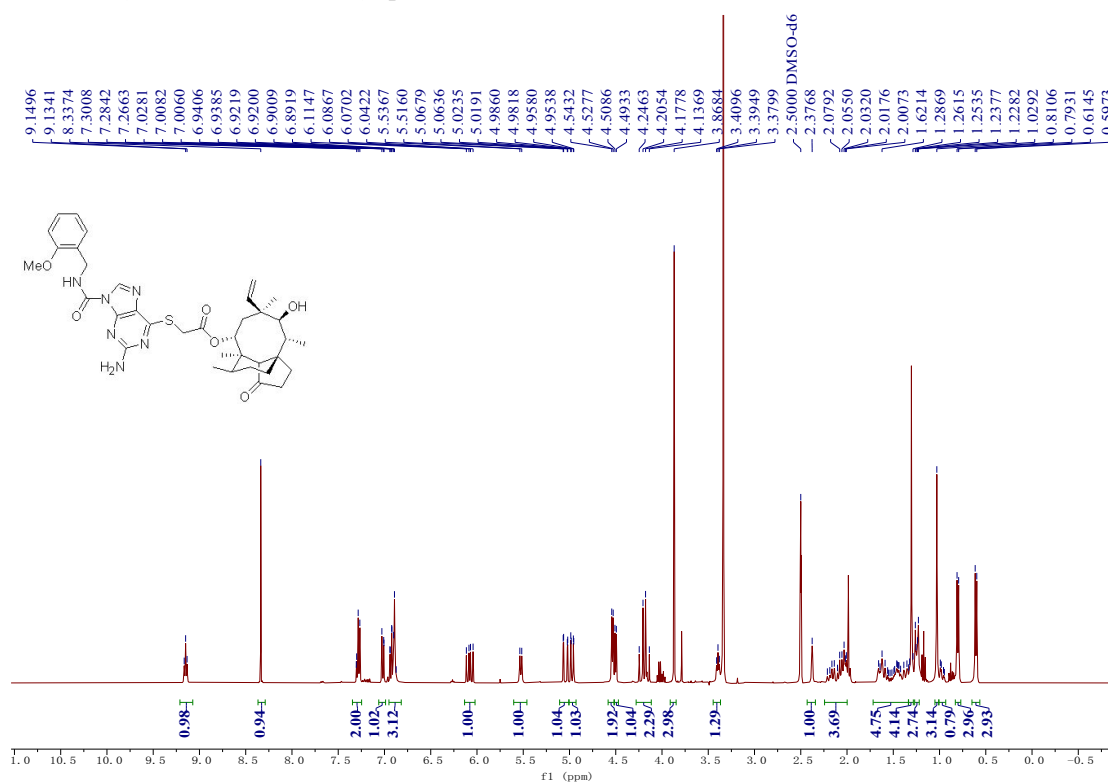

$^{13}\text{C}$  NMR (101 MHz,  $\text{DMSO-}d_6$ ) spectrum of **6n**

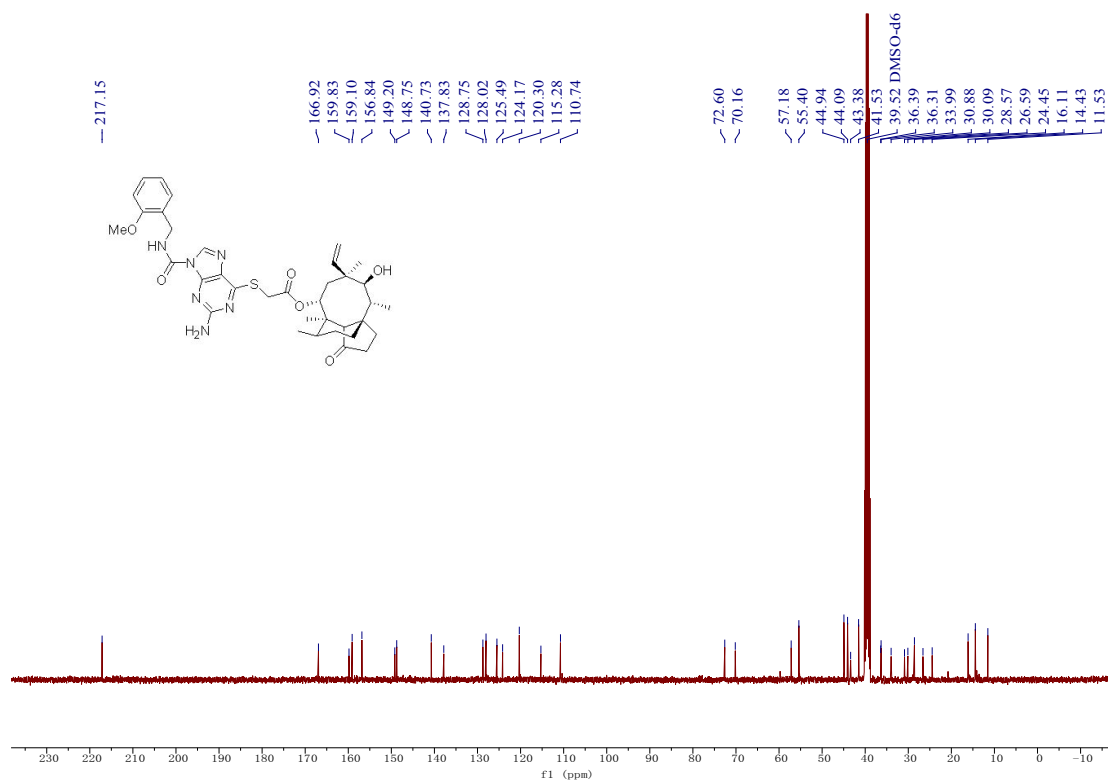

IR (KBr,  $\text{cm}^{-1}$ ) spectrum of **6n**

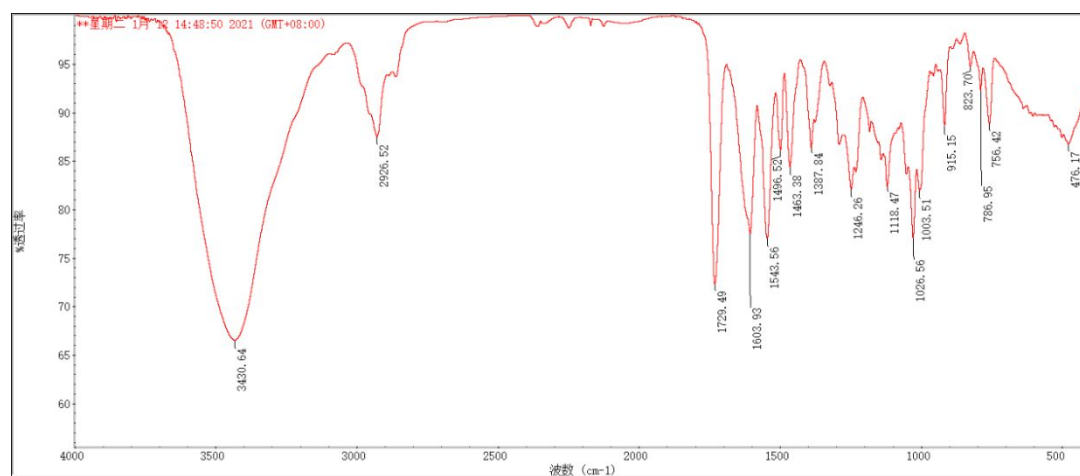

HRMS spectrum of **6n**

Spectrum from SHL-2020-09-04-POS-68.wiff2 (sample 1) - SHL-2020-09-04-POS-68, Experiment 1, +IDA TOF MS (100 - 1000) from 0.051 to 2.231 min

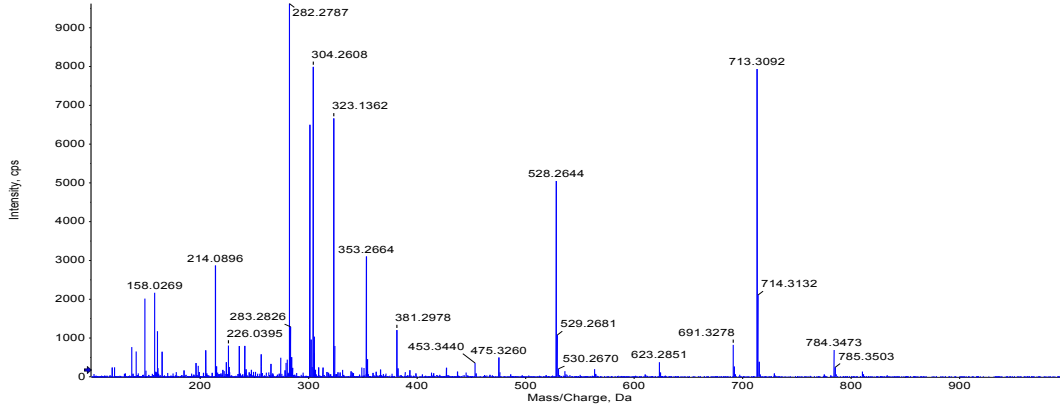

**Figure S23.** HPLC,  $^1\text{H}$  NMR,  $^{13}\text{C}$  NMR, HRMS and IR spectrum of final compound **60**

HPLC spectrum of **60**

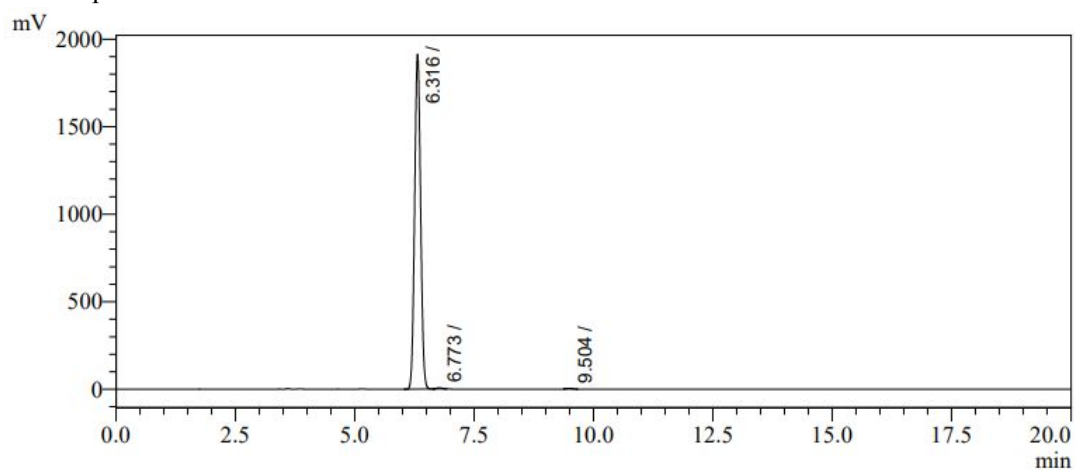

检测器A 254nm

| Peak# | Ret. Time | Height  | Area     | Area%  |
|-------|-----------|---------|----------|--------|
| 1     | 6.316     | 1910086 | 16582216 | 99.458 |
| 2     | 6.773     | 6883    | 52767    | 0.316  |
| 3     | 9.504     | 4141    | 37520    | 0.225  |

$^1\text{H}$  NMR (400 MHz,  $\text{DMSO}-d_6$ ) spectrum of **60**

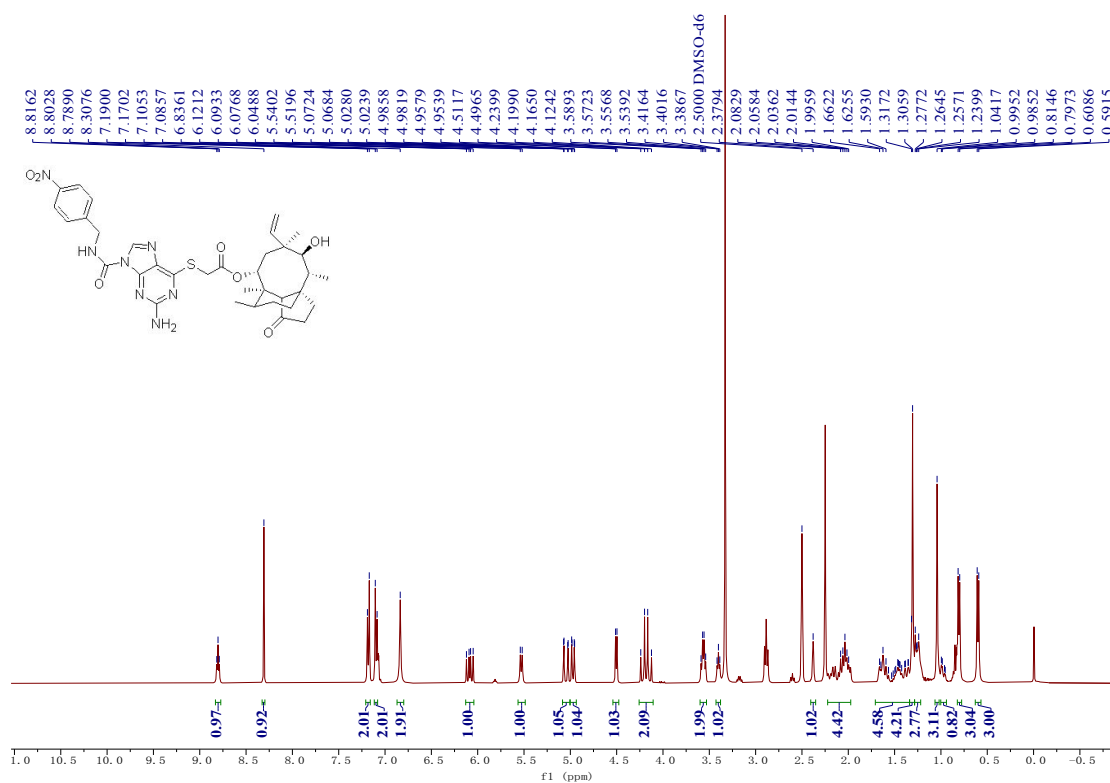



$^{13}\text{C}$  NMR (101 MHz,  $\text{DMSO-}d_6$ ) spectrum of **60**

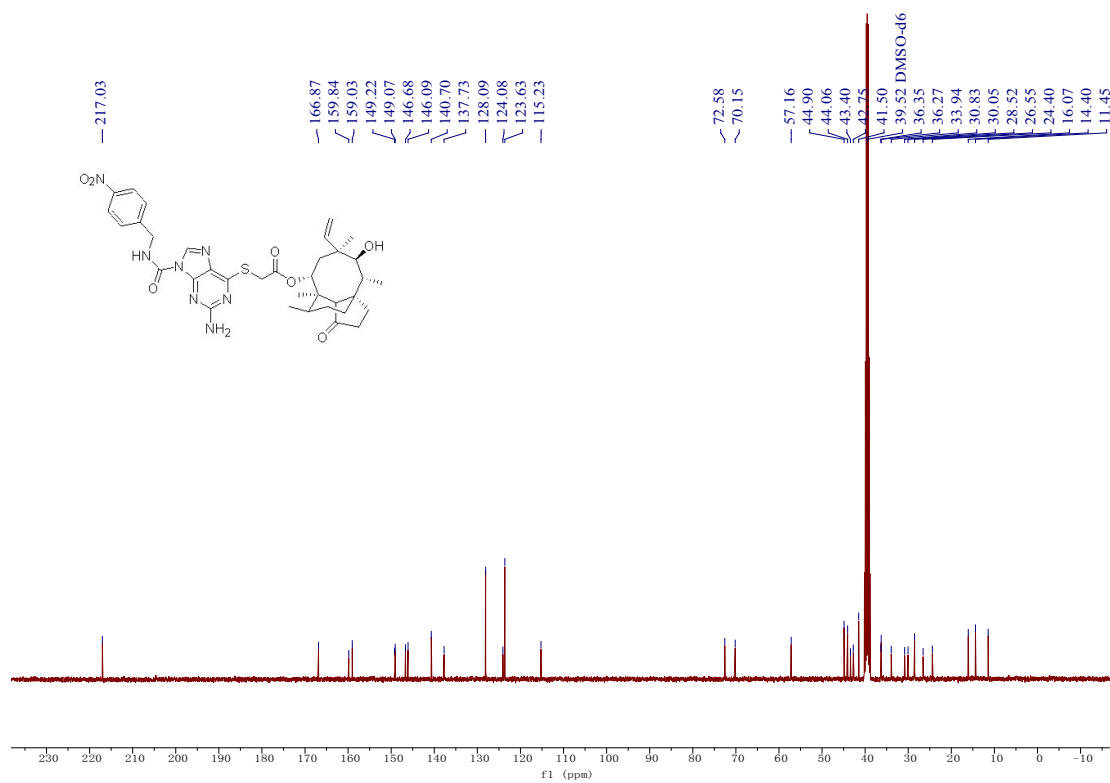

IR (KBr,  $\text{cm}^{-1}$ ) spectrum of **60**

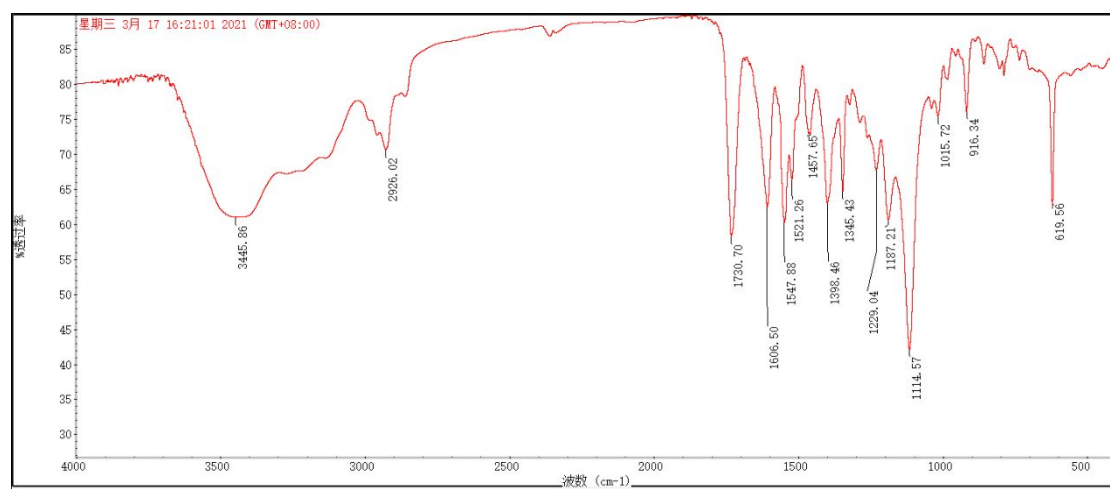

# HRMS spectrum of 60

Spectrum from SHL-2020-09-28-POS-62.wiff2 (sample 1) - SHL-2020-09-28-POS-62, Experiment 1, +IDA TOF MS (100 - 800) from 0.190 min

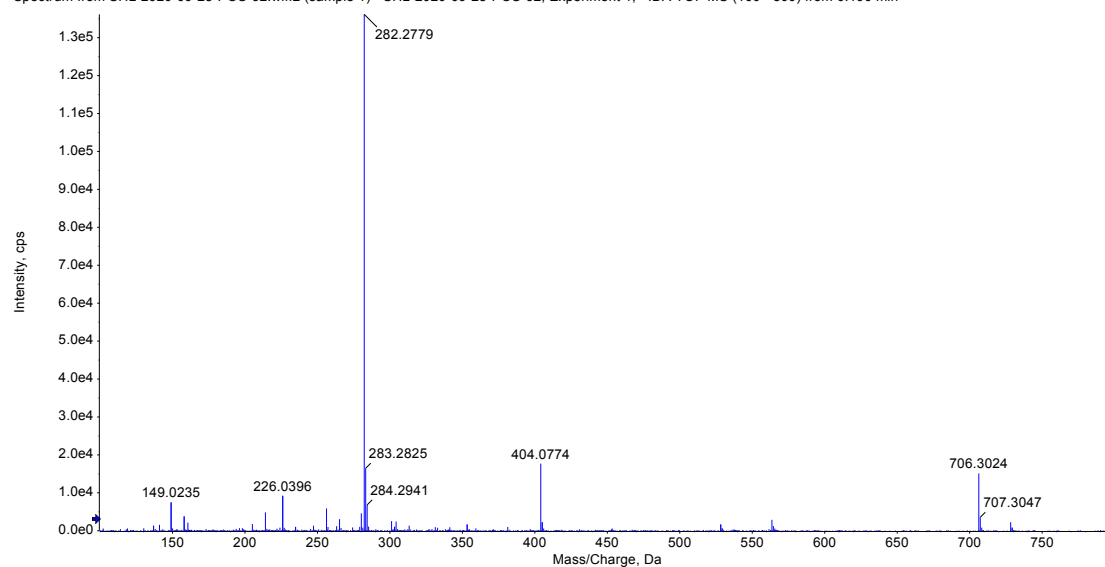

Spectrum from SHL-2020-09-28-POS-62.wiff2 (sample 1) - SHL-2020-09-28-POS-62, Experiment 1, +IDA TOF MS (100 - 800) from 0.190 min

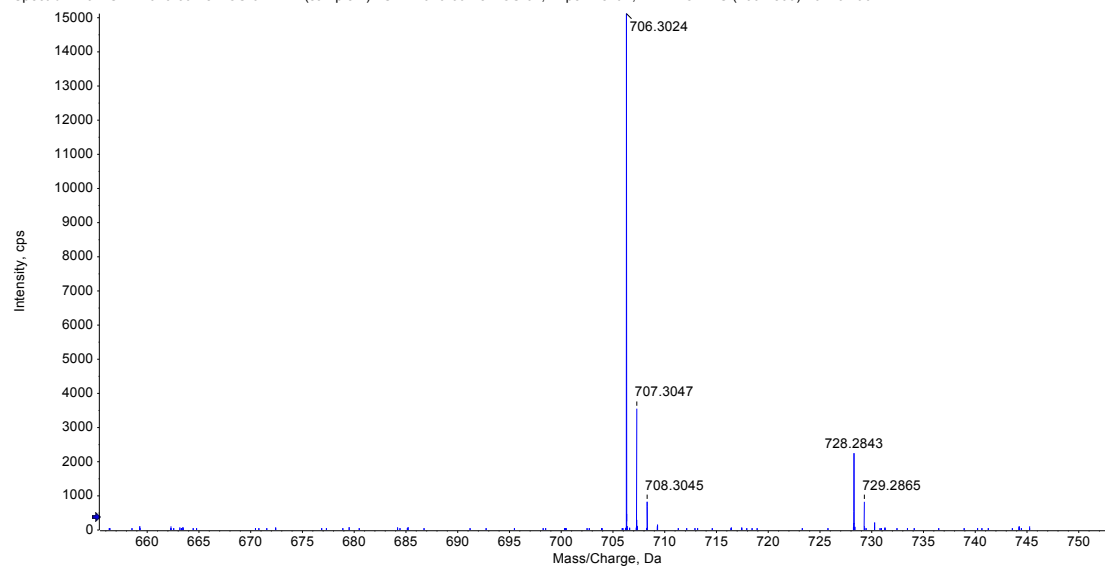

**Figure S24.** HPLC,  $^1\text{H}$  NMR,  $^{13}\text{C}$  NMR, HRMS and IR spectrum of final compound **6p**  
HPLC spectrum of **6p**

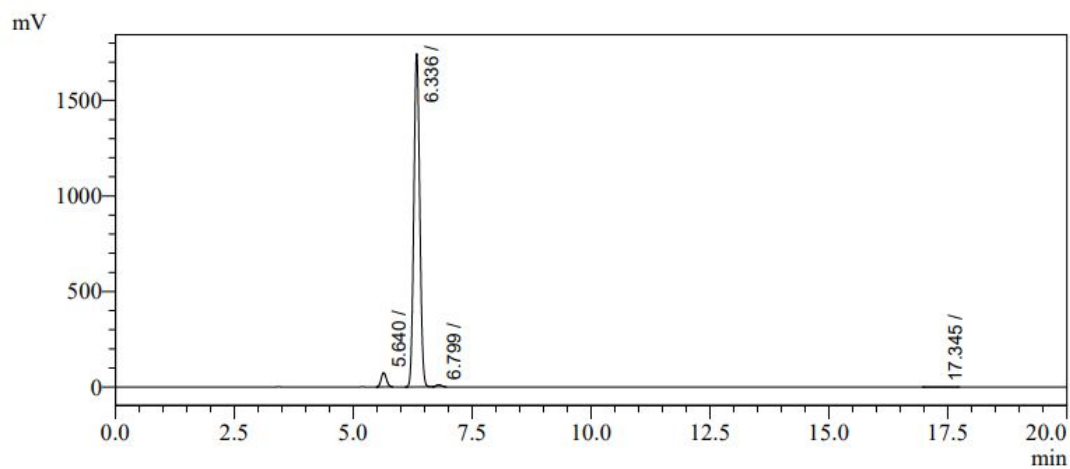

检测器A 254nm

| Peak# | Ret. Time | Height  | Area     | Area%  |
|-------|-----------|---------|----------|--------|
| 1     | 5.640     | 73643   | 561668   | 3.582  |
| 2     | 6.336     | 1741326 | 15042409 | 95.920 |
| 3     | 6.799     | 9819    | 74926    | 0.478  |
| 4     | 17.345    | 170     | 3213     | 0.020  |

$^1\text{H}$  NMR (400 MHz,  $\text{DMSO}-d_6$ ) spectrum of **6p**

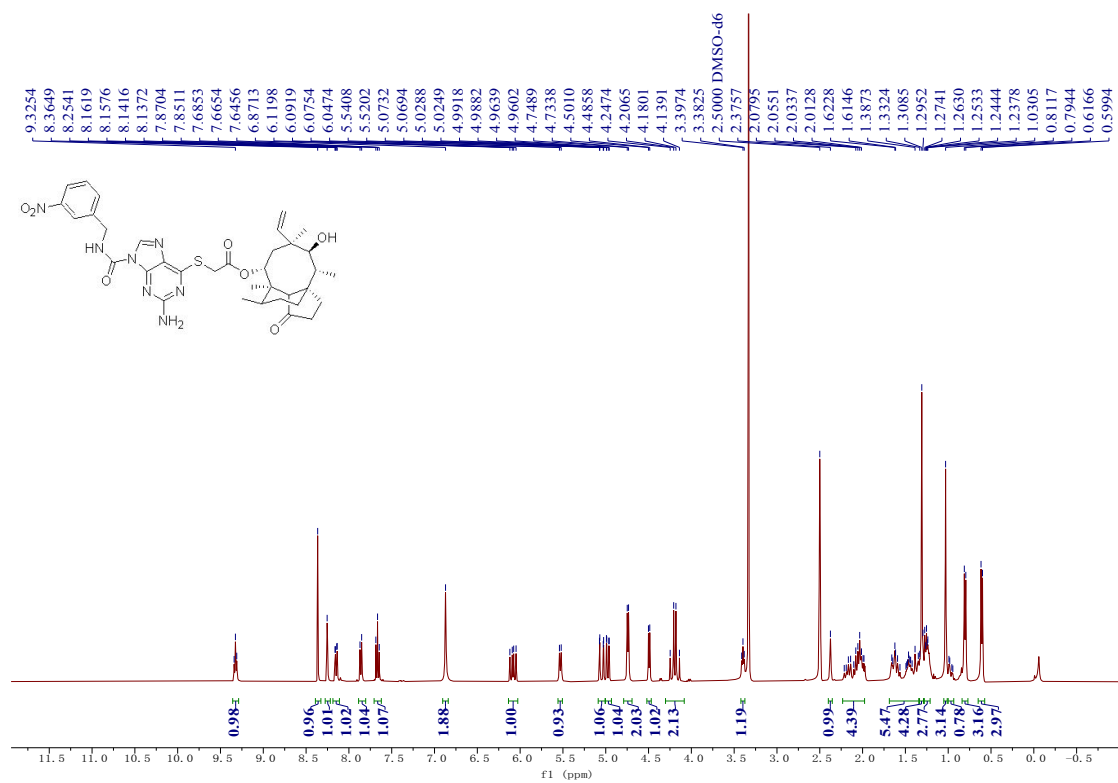

$^{13}\text{C}$  NMR (101 MHz,  $\text{DMSO-}d_6$ ) spectrum of **6p**

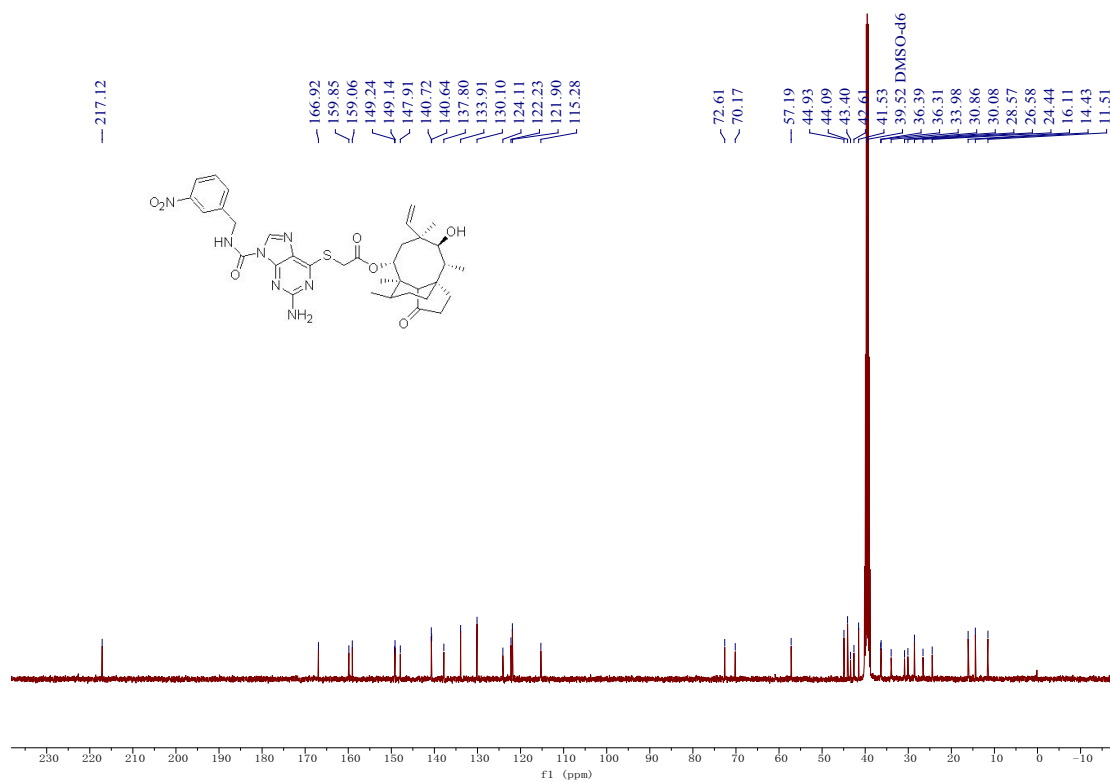

IR (KBr,  $\text{cm}^{-1}$ ) spectrum of **6p**

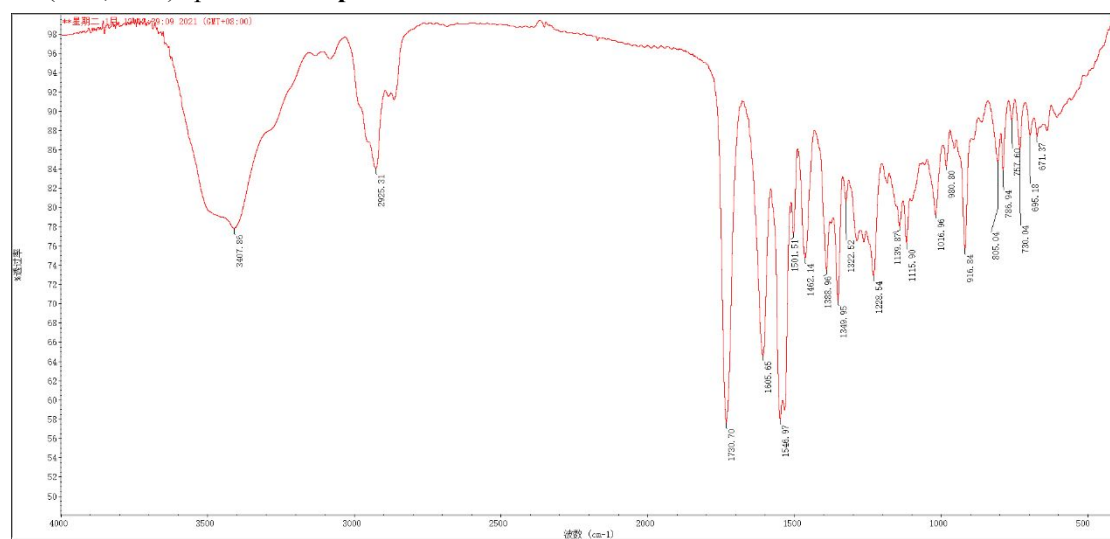

# HRMS spectrum of 6p

Spectrum from SHL-2020-09-04-POS-72.wiff2 (sample 1) - SHL-2020-09-04-POS-72, Experiment 1, +IDA TOF MS (100 - 1000) from 0.514 min

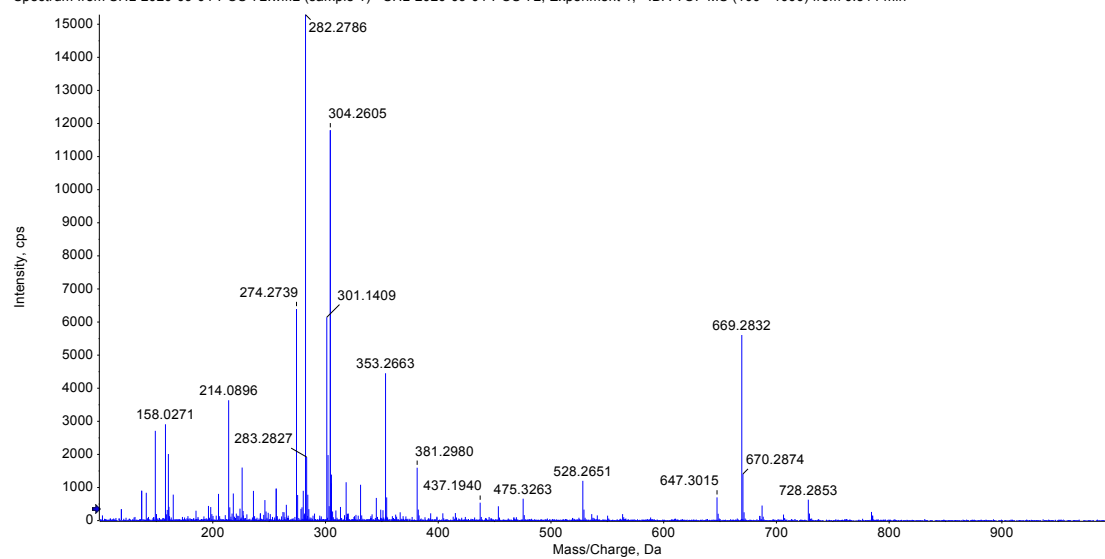

Spectrum from SHL-2020-09-04-POS-72.wiff2 (sample 1) - SHL-2020-09-04-POS-72, Experiment 1, +IDA TOF MS (100 - 1000) from 0.514 min

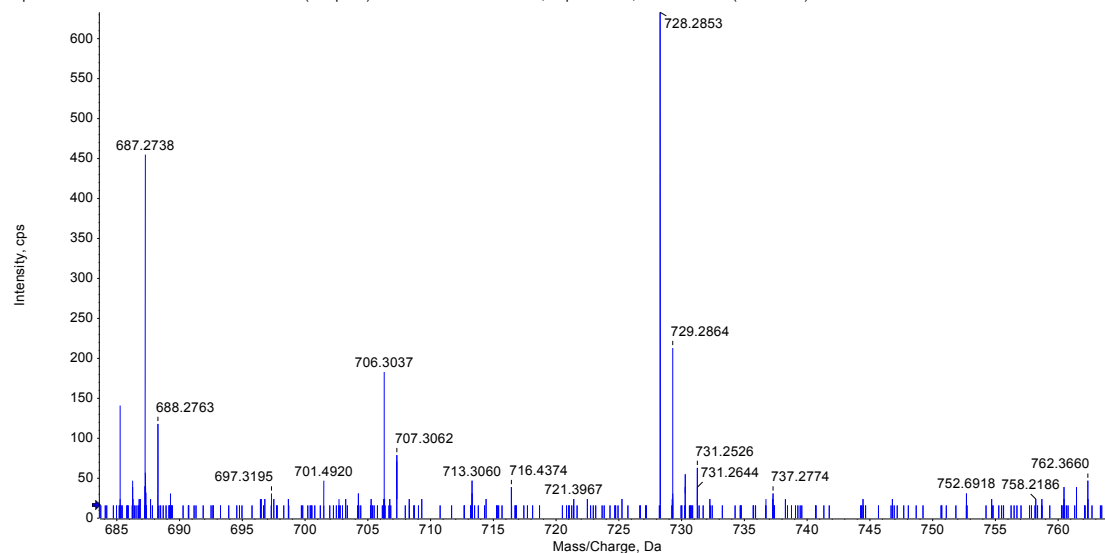

**Figure S25.** HPLC, <sup>1</sup>H NMR, <sup>13</sup>C NMR, HRMS and IR spectrum of final compound **8a**

HPLC spectrum of **8a**

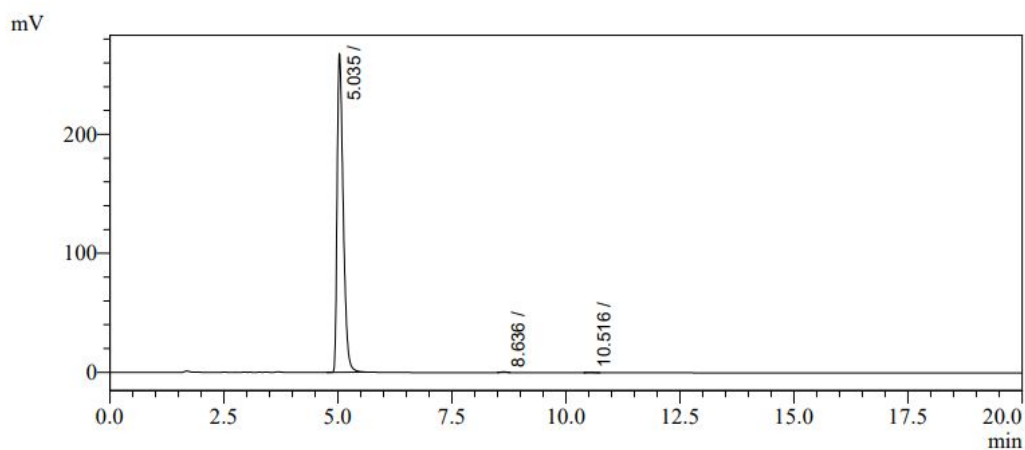

检测器A 254nm

| Peak# | Ret. Time | Height | Area    | Area%  |
|-------|-----------|--------|---------|--------|
| 1     | 5.035     | 268272 | 2474917 | 99.702 |
| 2     | 8.636     | 564    | 4599    | 0.185  |
| 3     | 10.516    | 309    | 2787    | 0.112  |

<sup>1</sup>H NMR (400 MHz, CDCl<sub>3</sub>) spectrum of **8a**

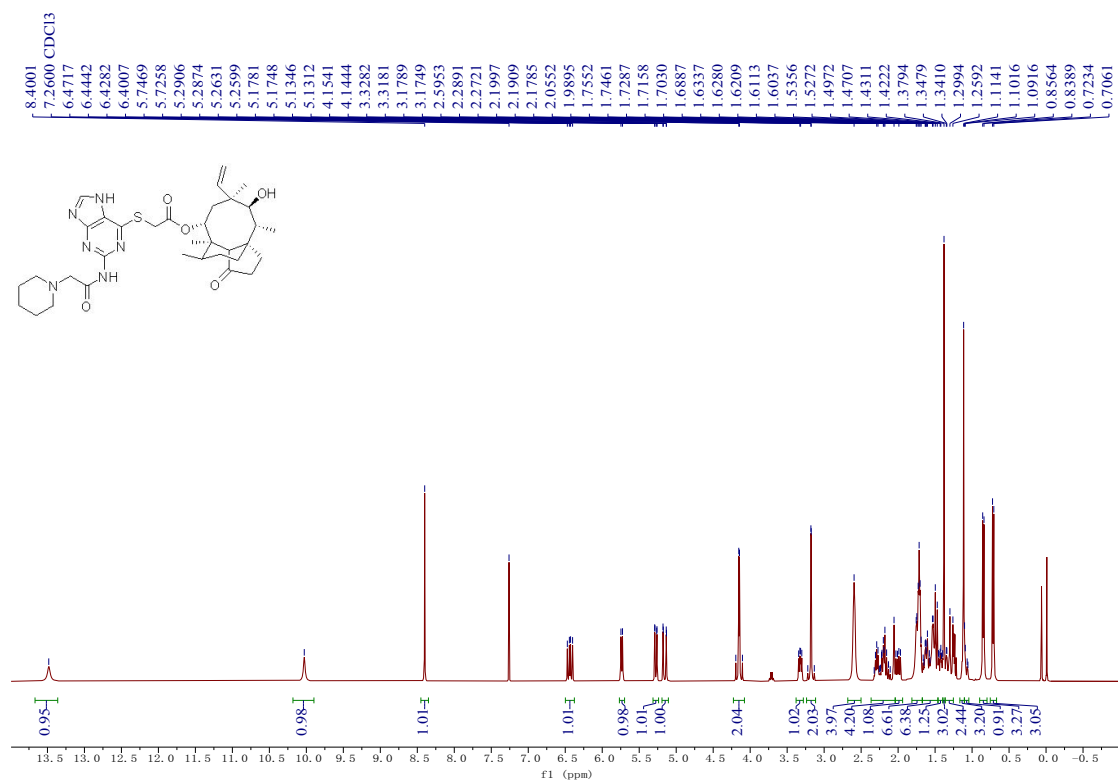

$^{13}\text{C}$  NMR (101 MHz,  $\text{DMSO-}d_6$ ) spectrum of **8a**

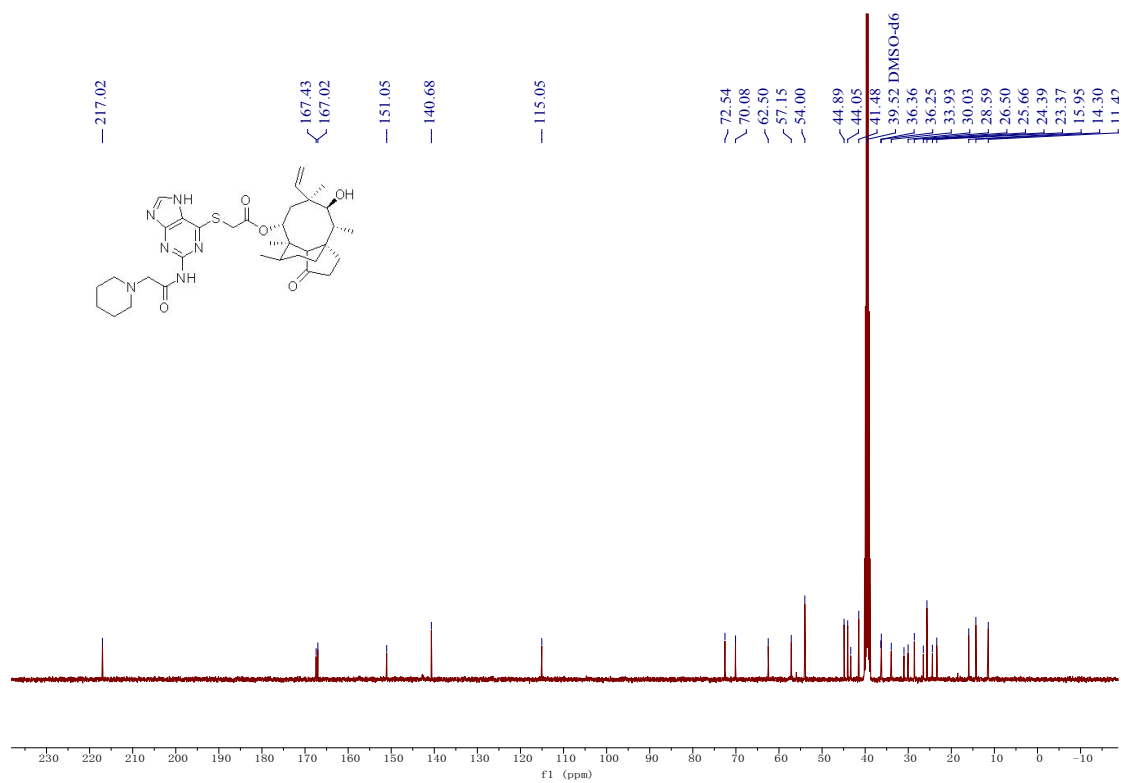

IR (KBr,  $\text{cm}^{-1}$ ) spectrum of **8a**

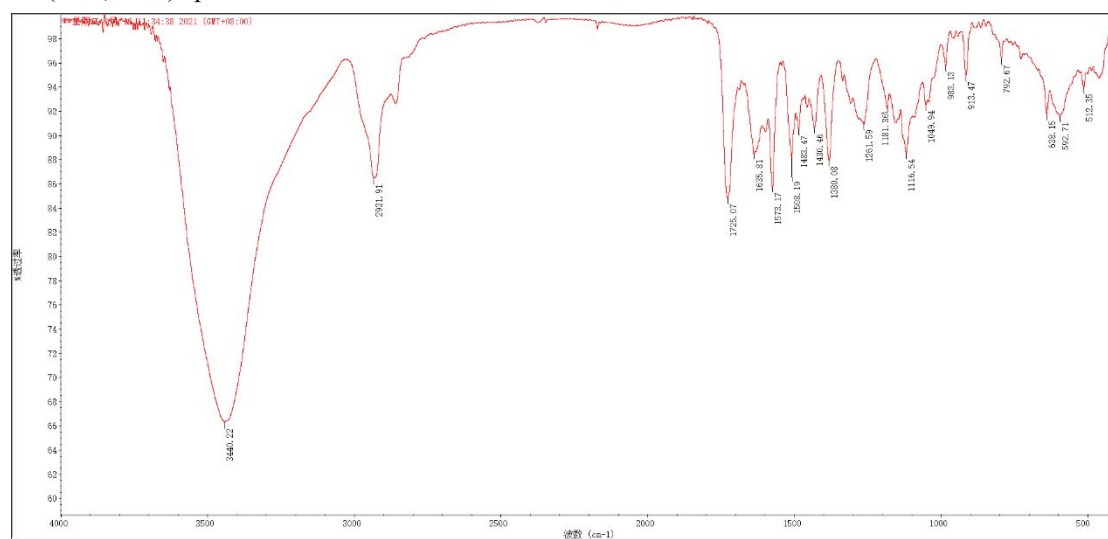

# HRMS spectrum of **8a**

Spectrum from SHL-2020-09-04-POS-80.wiff2 (sample 1) - SHL-2020-09-04-POS-80, Experiment 1, +IDA TOF MS (100 - 1000) from 0.363 min

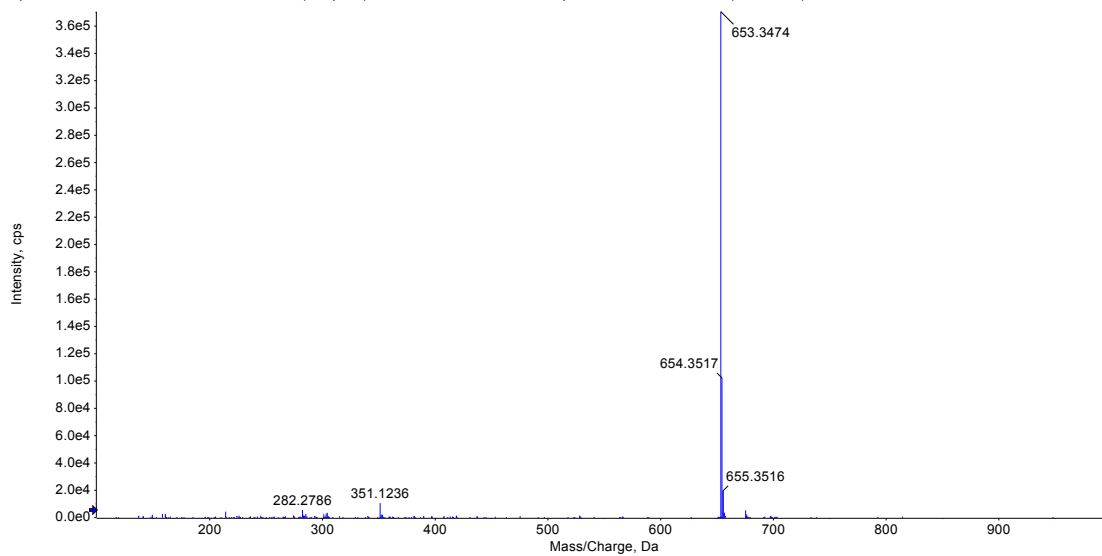

Spectrum from SHL-2020-09-04-POS-80.wiff2 (sample 1) - SHL-2020-09-04-POS-80, Experiment 1, +IDA TOF MS (100 - 1000) from 0.363 min

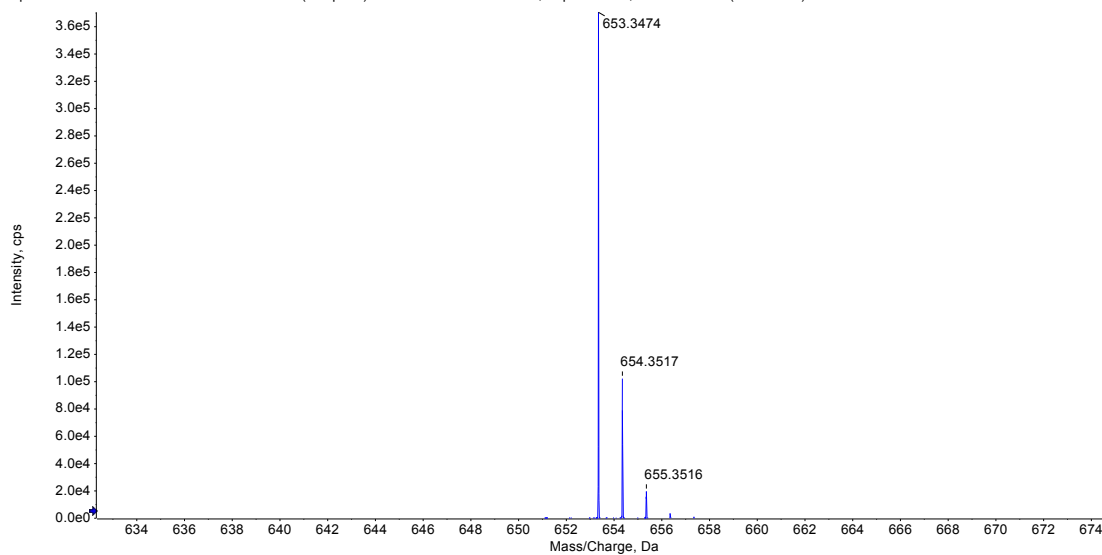



**Figure S26.** HPLC,  $^1\text{H}$  NMR,  $^{13}\text{C}$  NMR, HRMS and IR spectrum of final compound **8b**  
HPLC spectrum of **8b**

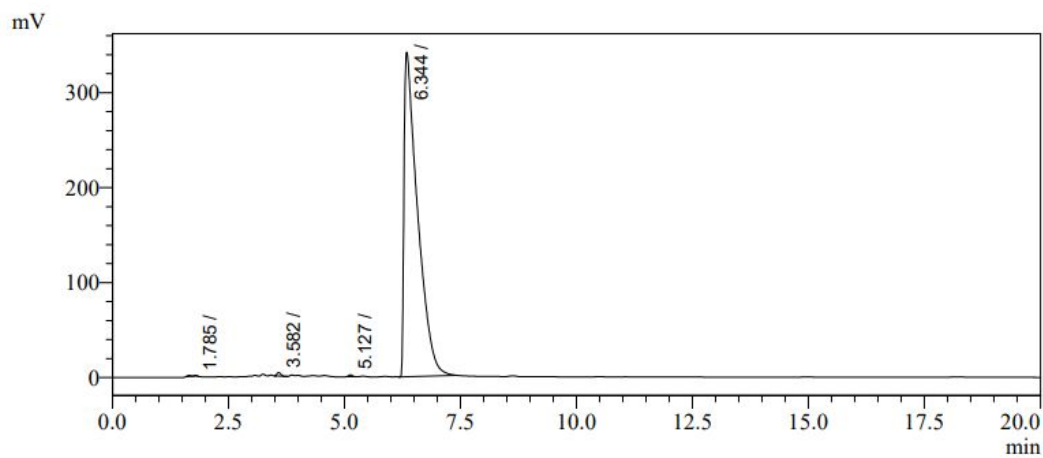

检测器A 254nm

| Peak# | Ret. Time | Height | Area    | Area%  |
|-------|-----------|--------|---------|--------|
| 1     | 1.785     | 568    | 6907    | 0.099  |
| 2     | 3.582     | 3622   | 20670   | 0.296  |
| 3     | 5.127     | 1897   | 10701   | 0.153  |
| 4     | 6.344     | 341961 | 6935126 | 99.451 |

$^1\text{H}$  NMR (400 MHz,  $\text{CDCl}_3$ ) spectrum of **8b**

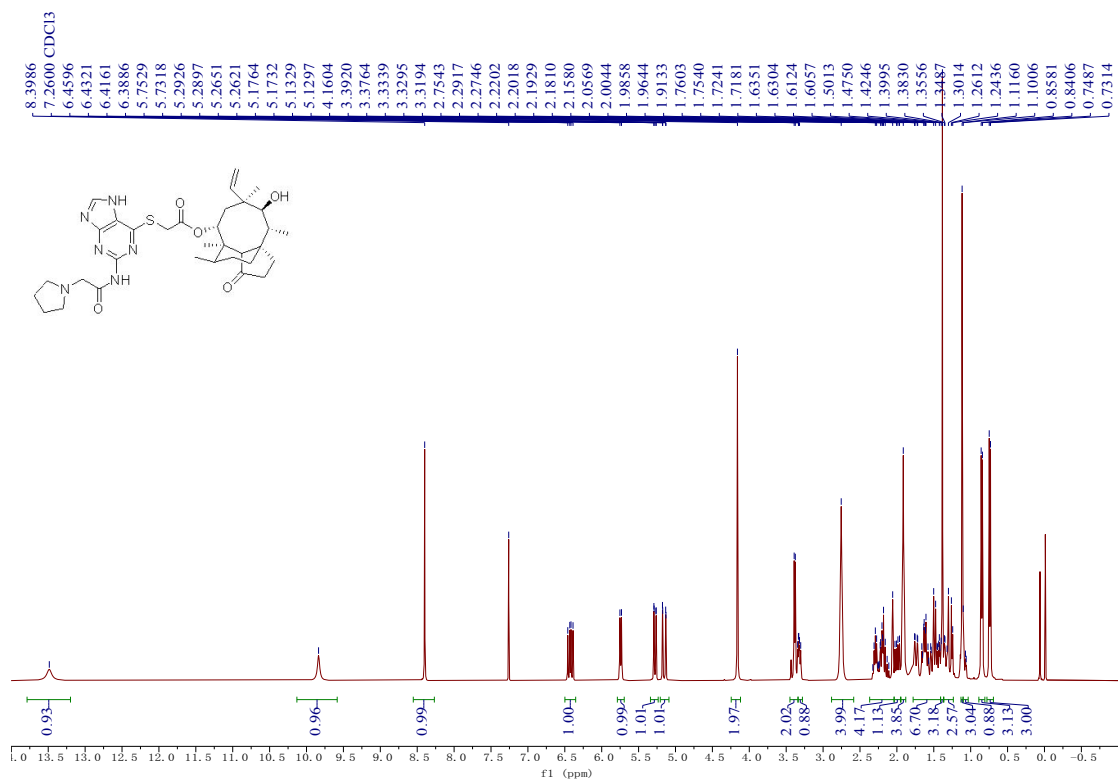

$^{13}\text{C}$  NMR (101 MHz,  $\text{CDCl}_3$ ) spectrum of **8b**

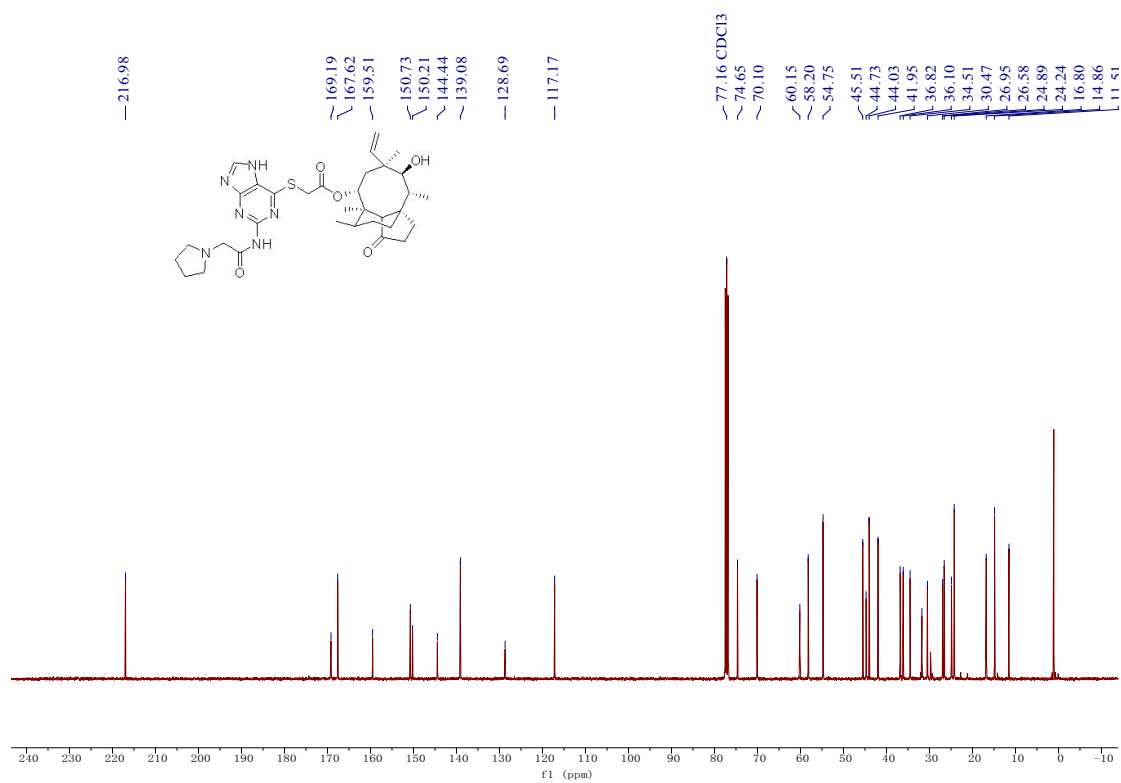

IR (KBr,  $\text{cm}^{-1}$ ) spectrum of **8b**

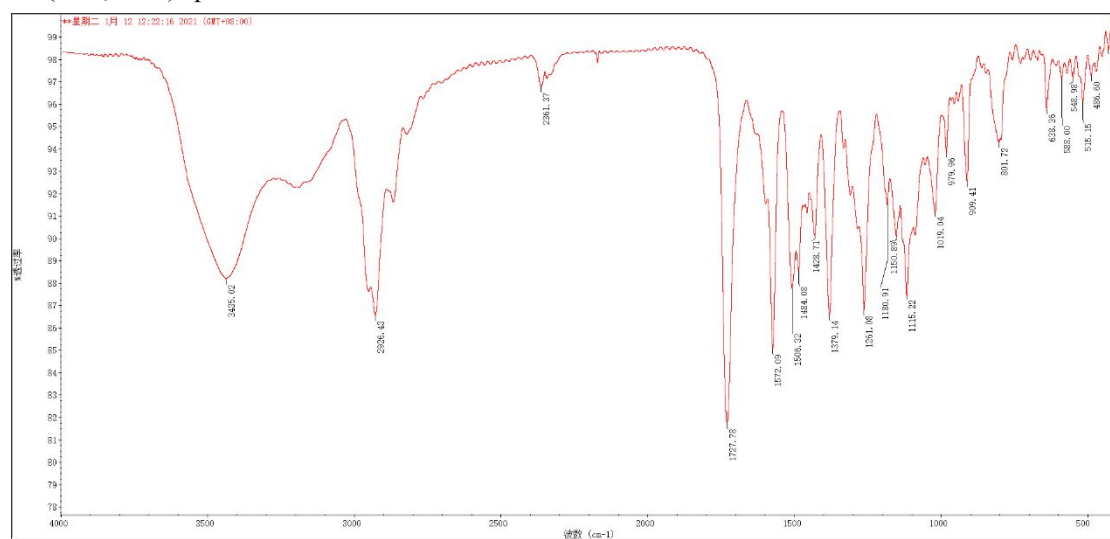

# HRMS spectrum of 8b

Spectrum from SHL-2020-09-04-POS-62.wiff2 (sample 1) - SHL-2020-09-04-POS-62, Experiment 1, +IDA TOF MS (100 - 1000) from 0.463 min

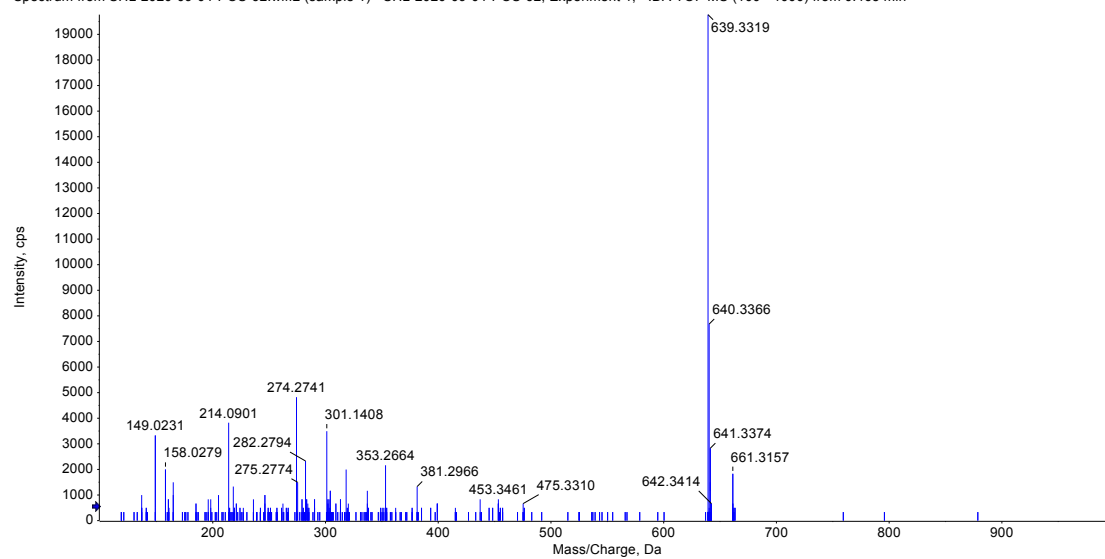

Spectrum from SHL-2020-09-04-POS-62.wiff2 (sample 1) - SHL-2020-09-04-POS-62, Experiment 1, +IDA TOF MS (100 - 1000) from 0.463 min

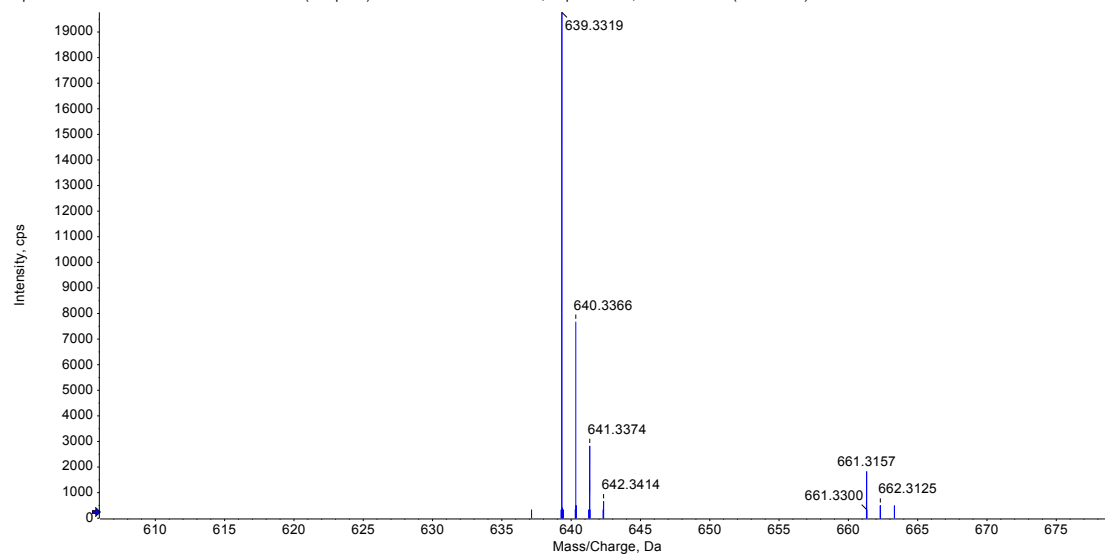

**Figure S27.** HPLC,  $^1\text{H}$  NMR,  $^{13}\text{C}$  NMR, HRMS and IR spectrum of final compound **8c**  
HPLC spectrum of **8c**

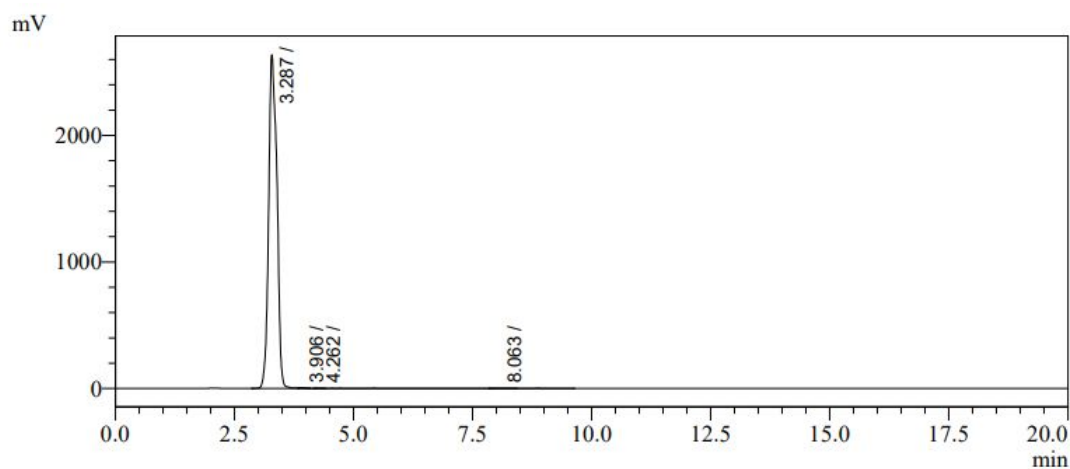

检测器A 254nm

| Peak# | Ret. Time | Height  | Area     | Area%  |
|-------|-----------|---------|----------|--------|
| 1     | 3.287     | 2637923 | 32092708 | 99.898 |
| 2     | 3.906     | 3218    | 16920    | 0.053  |
| 3     | 4.262     | 2065    | 12513    | 0.039  |
| 4     | 8.063     | 315     | 3474     | 0.011  |

$^1\text{H}$  NMR (400 MHz,  $\text{CDCl}_3$ ) spectrum of **8c**

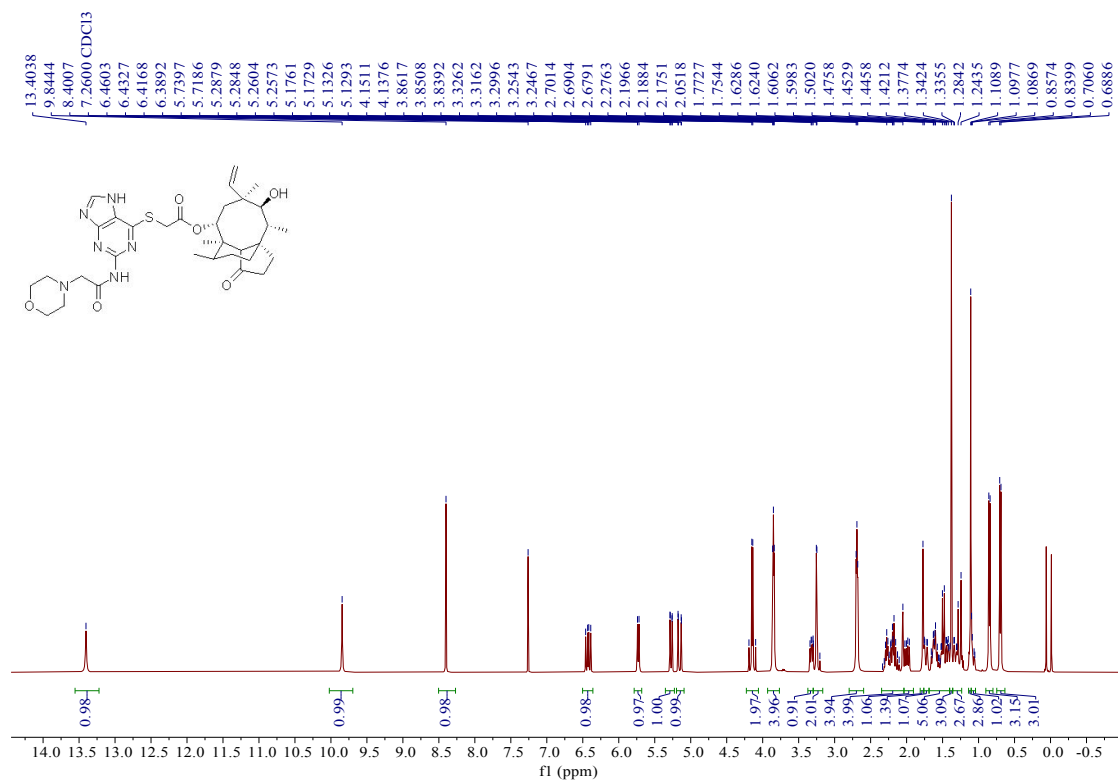

$^{13}\text{C}$  NMR (101 MHz,  $\text{CDCl}_3$ ) spectrum of **8c**

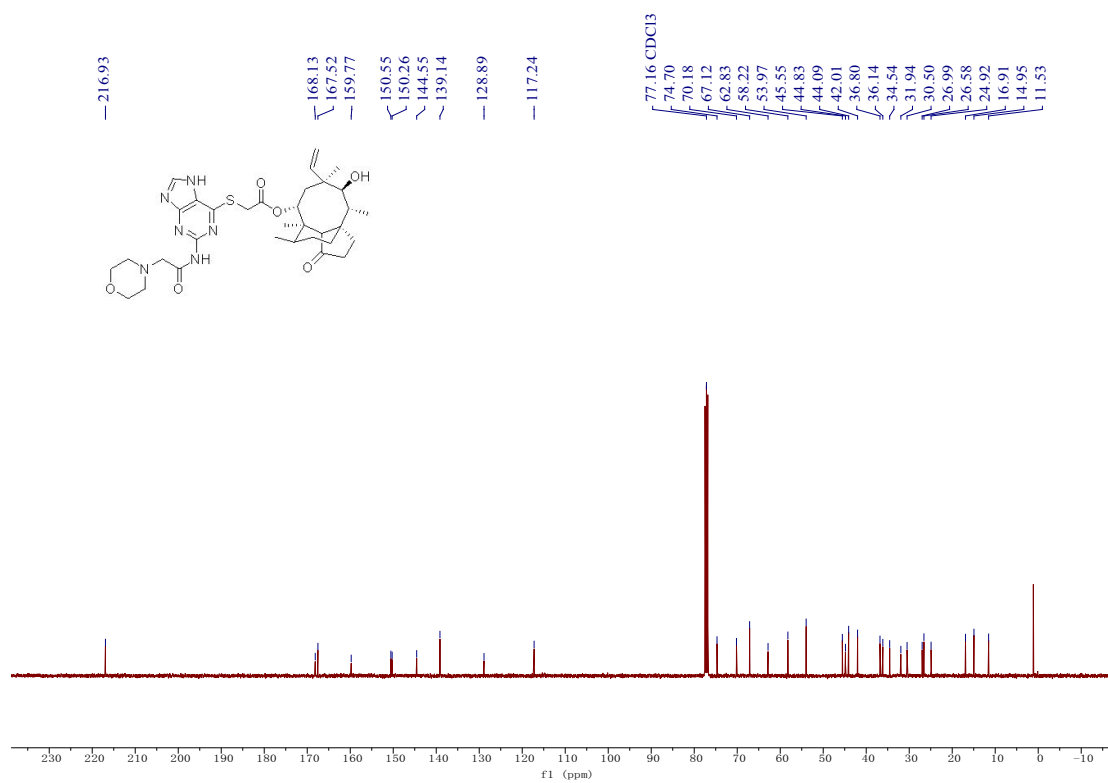

IR (KBr,  $\text{cm}^{-1}$ ) spectrum of **8c**

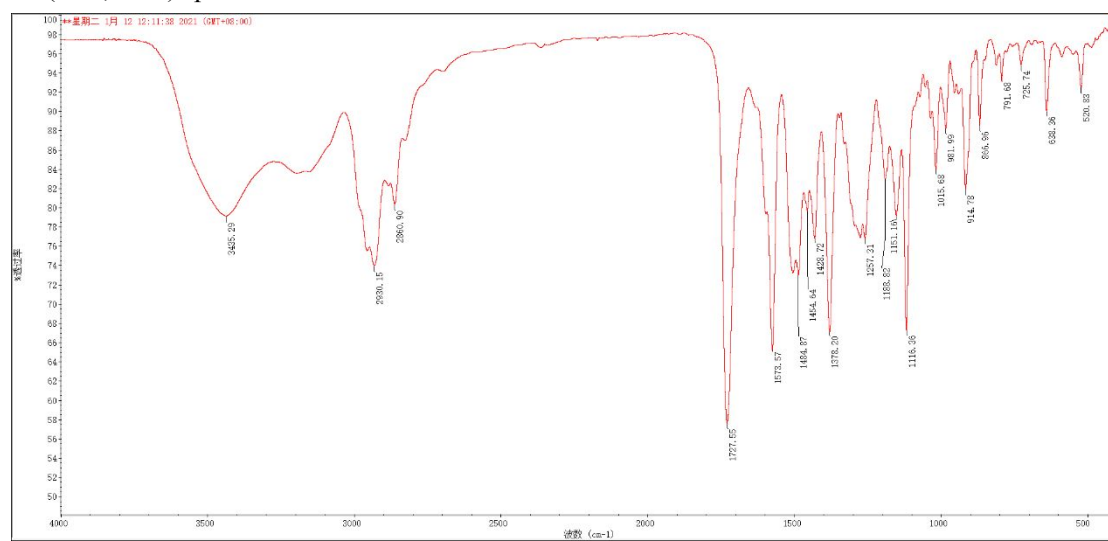

# HRMS spectrum of **8c**

Spectrum from SHL-2020-09-04-POS-78.wiff2 (sample 1) - SHL-2020-09-04-POS-78, Experiment 1, +IDA TOF MS (100 - 1000) from 0.387 min

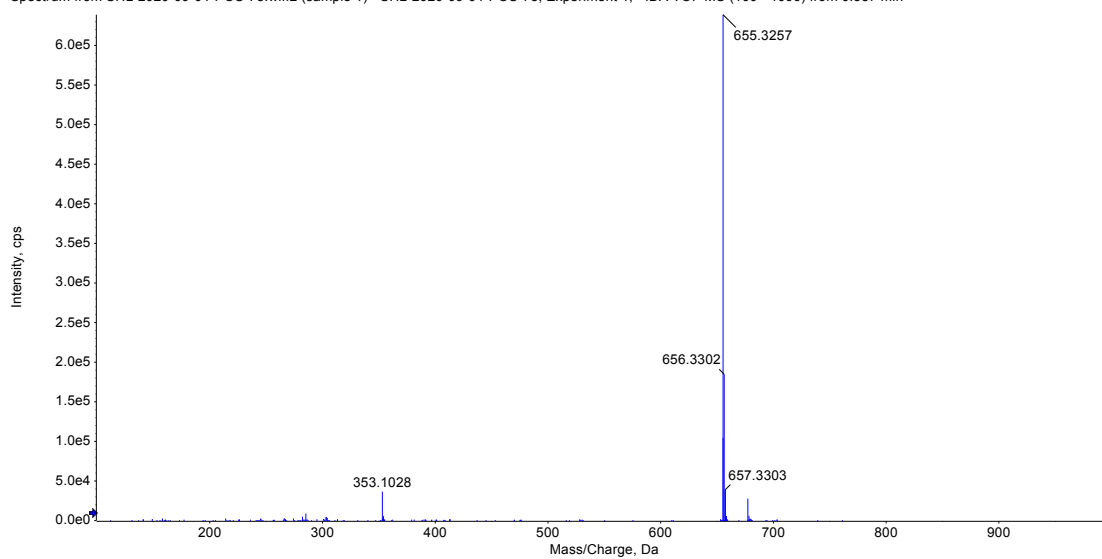

Spectrum from SHL-2020-09-04-POS-78.wiff2 (sample 1) - SHL-2020-09-04-POS-78, Experiment 1, +IDA TOF MS (100 - 1000) from 0.387 min

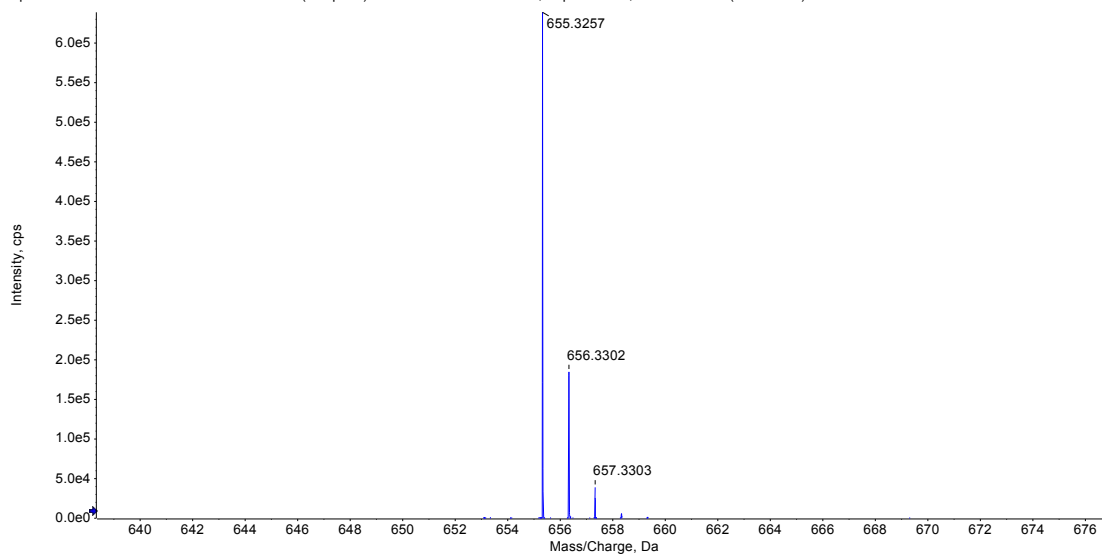

**Figure S28.** HPLC,  $^1\text{H}$  NMR,  $^{13}\text{C}$  NMR, HRMS and IR spectrum of final compound **8d**  
HPLC spectrum of **8d**

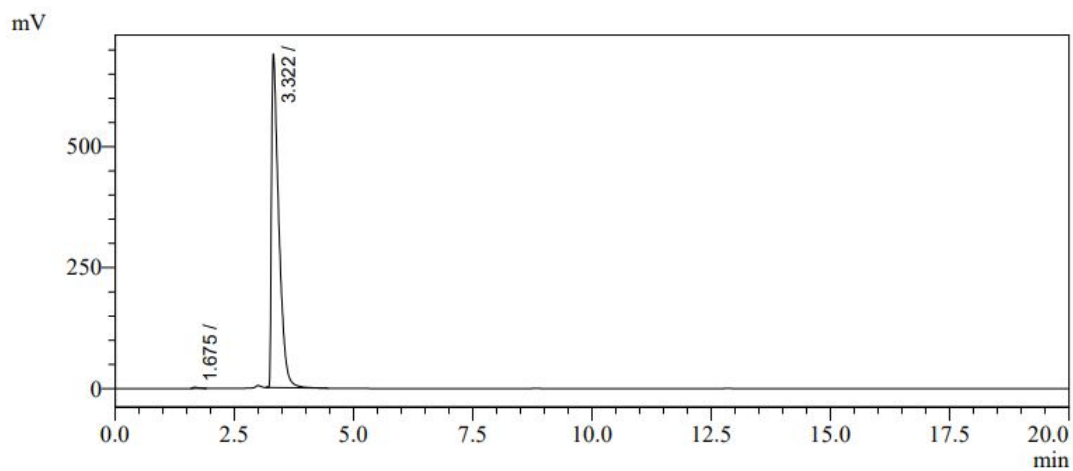

检测器A 254nm

| Peak# | Ret. Time | Height | Area    | Area%  |
|-------|-----------|--------|---------|--------|
| 1     | 1.675     | 2419   | 17612   | 0.239  |
| 2     | 3.322     | 689822 | 7340259 | 99.761 |

$^1\text{H}$  NMR (400 MHz,  $\text{CDCl}_3$ ) spectrum of **8d**

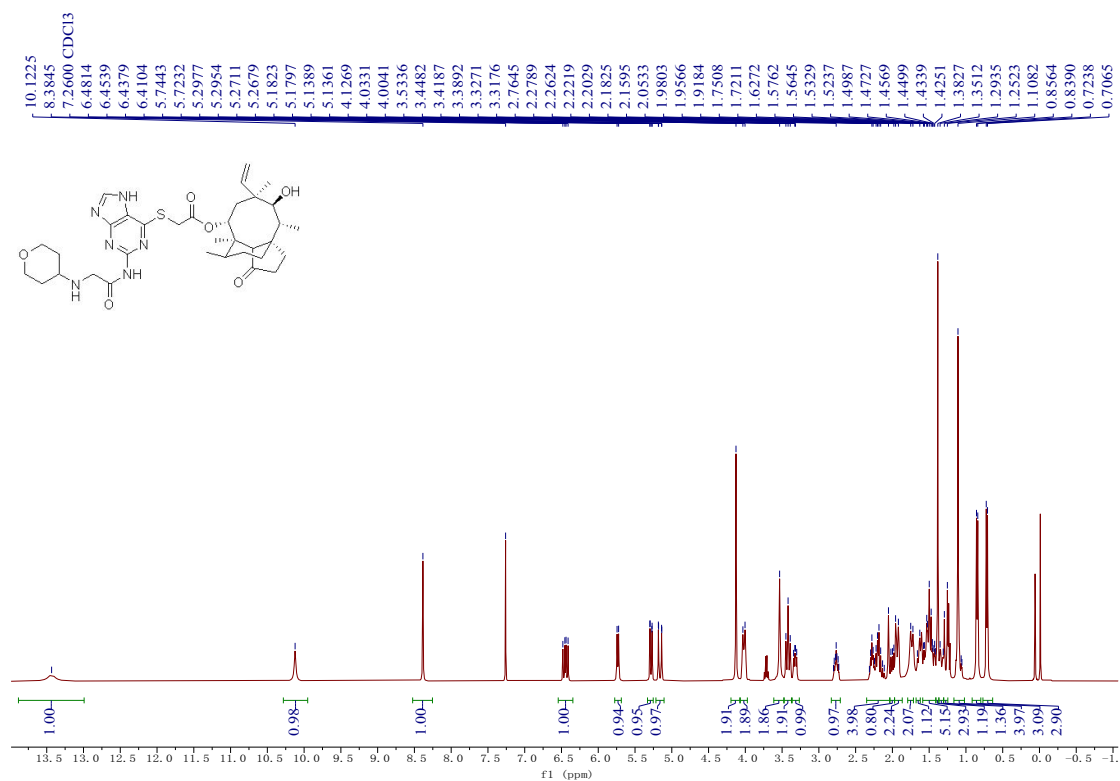

$^{13}\text{C}$  NMR (101 MHz,  $\text{CDCl}_3$ ) spectrum of **8d**

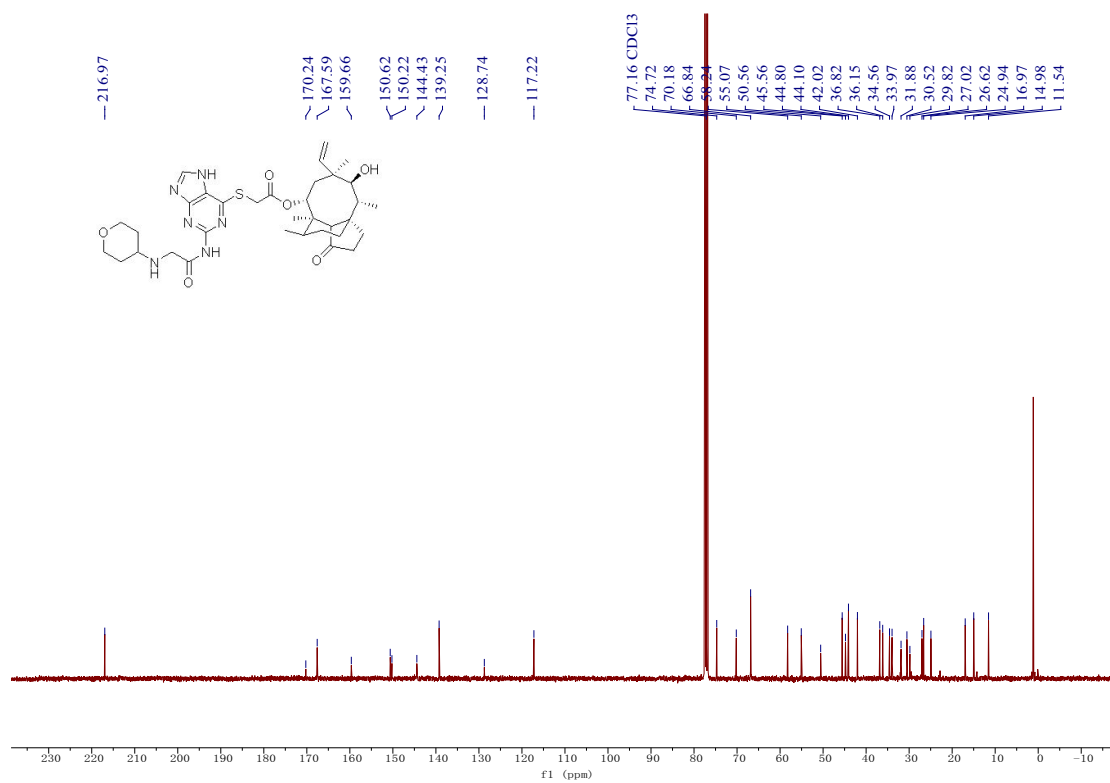

IR (KBr,  $\text{cm}^{-1}$ ) spectrum of **8d**

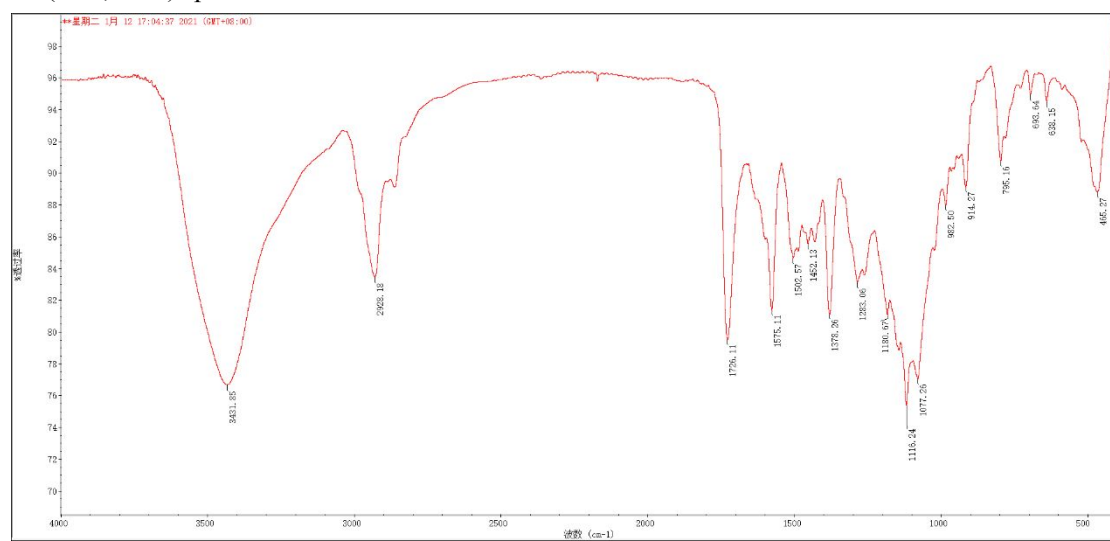



# HRMS spectrum of **8d**

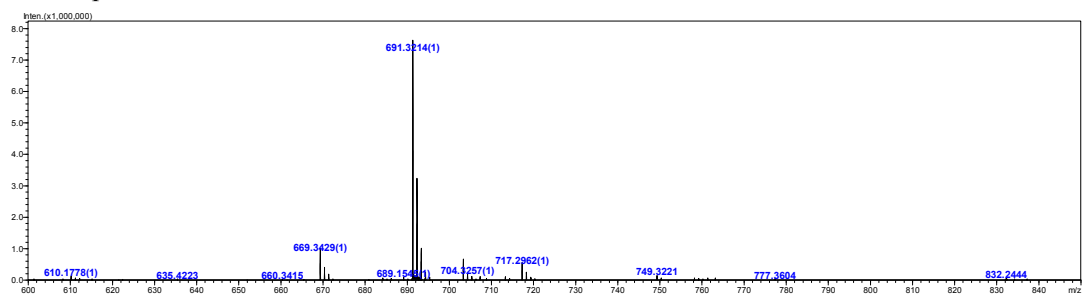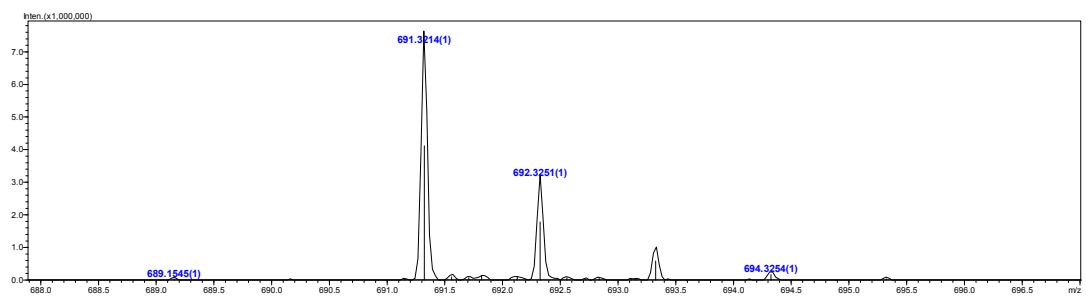

**Figure S29.** HPLC,  $^1\text{H}$  NMR,  $^{13}\text{C}$  NMR, HRMS and IR spectrum of final compound **8e**  
HPLC spectrum of **8e**

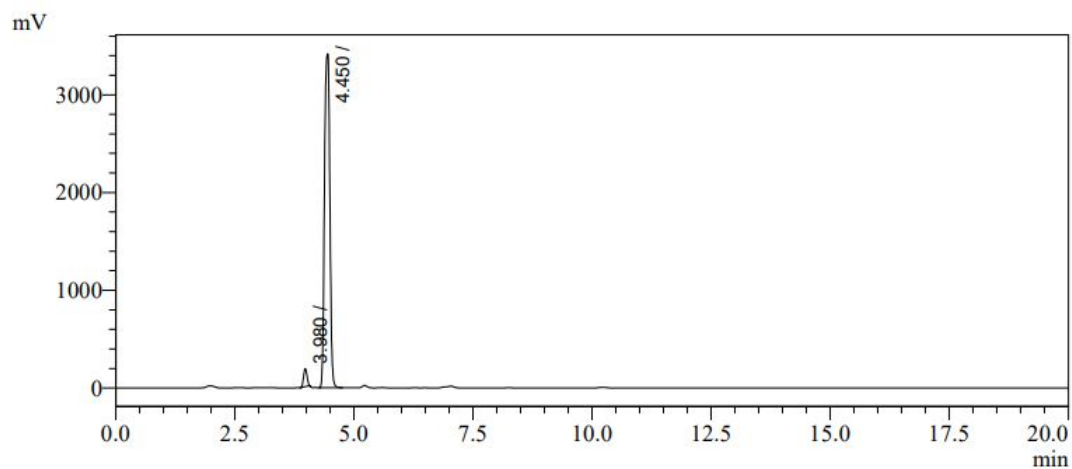

检测器A 254nm

| Peak# | Ret. Time | Height  | Area     | Area%  |
|-------|-----------|---------|----------|--------|
| 1     | 3.980     | 183937  | 917976   | 3.332  |
| 2     | 4.450     | 3417578 | 26631308 | 96.668 |

$^1\text{H}$  NMR (400 MHz,  $\text{DMSO}-d_6$ ) spectrum of **8e**

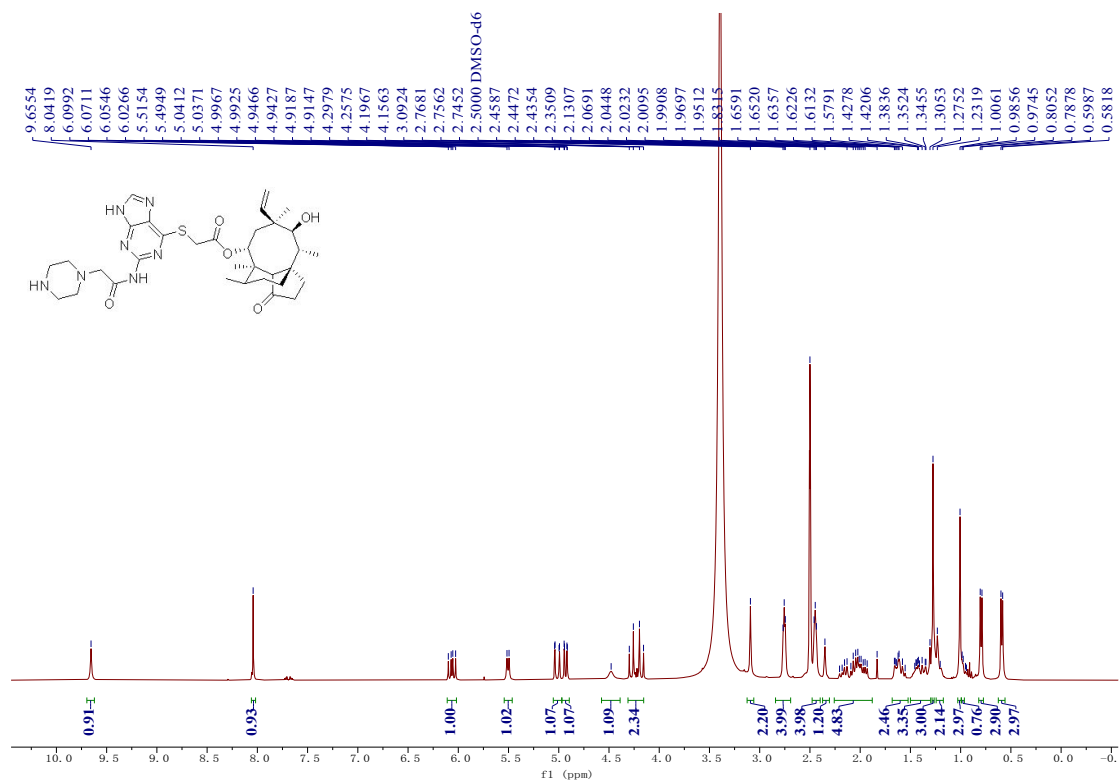

$^{13}\text{C}$  NMR (101 MHz,  $\text{DMSO-}d_6$ ) spectrum of **8e**

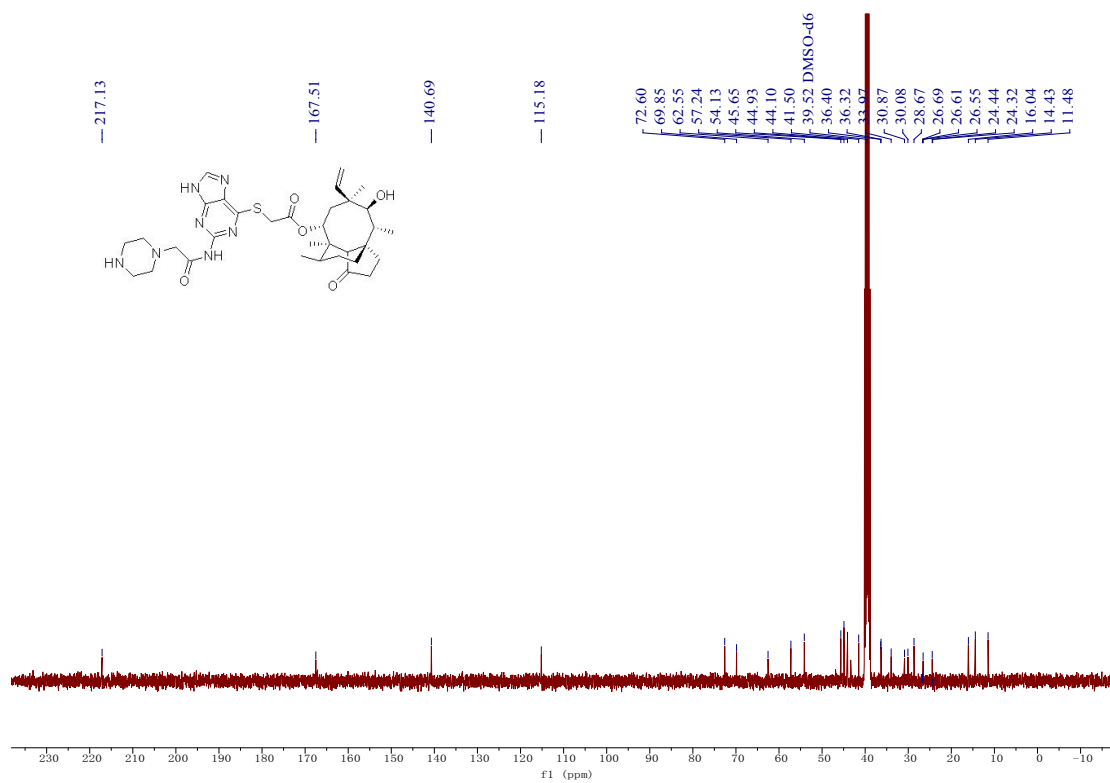

IR (KBr,  $\text{cm}^{-1}$ ) spectrum of **8e**

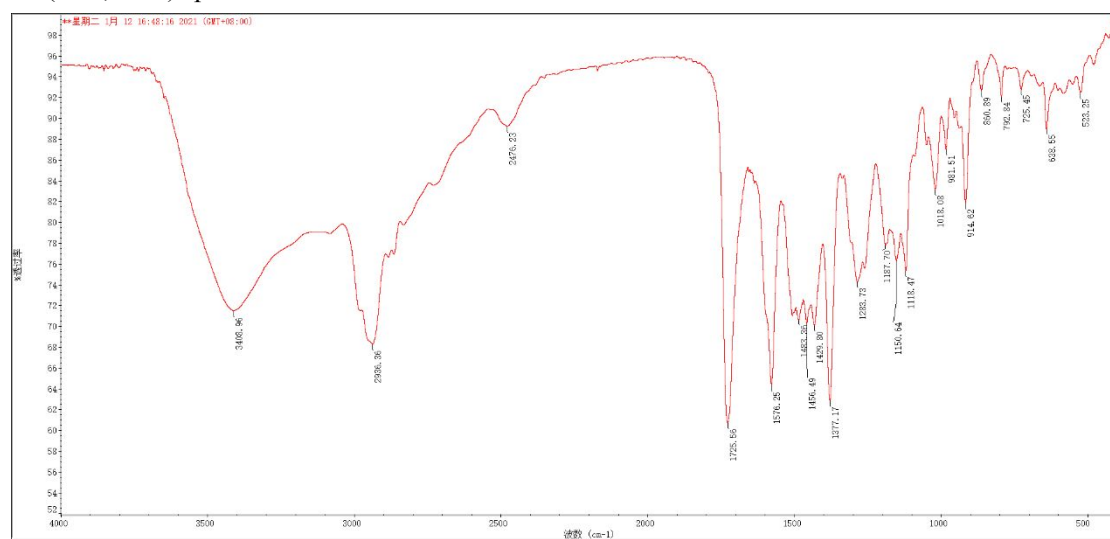

# HRMS spectrum of **8e**

Spectrum from SHL-2020-10-26-POS-14.wiff2 (sample 1) - SHL-2020-10-26-POS-14, Experiment 1, +IDA TOF MS (100 - 800) from 0.285 min

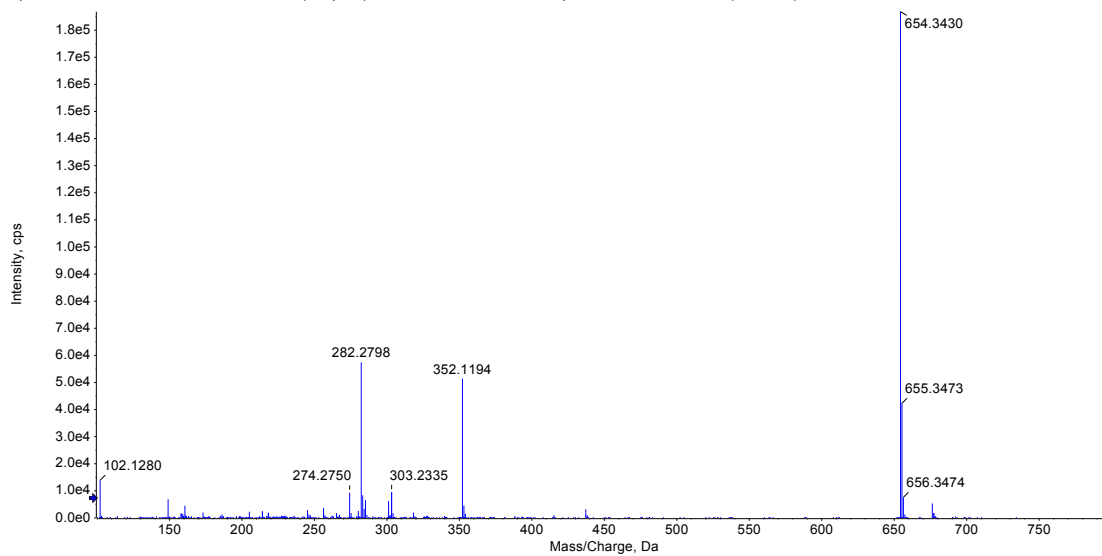

Spectrum from SHL-2020-10-26-POS-14.wiff2 (sample 1) - SHL-2020-10-26-POS-14, Experiment 1, +IDA TOF MS (100 - 800) from 0.285 min

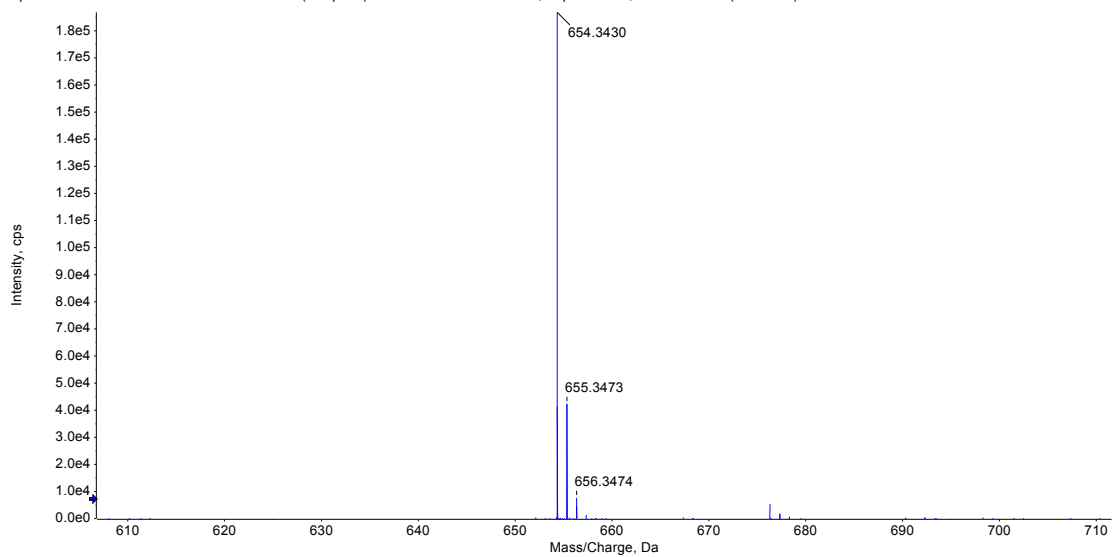

**Figure S30.** HPLC,  $^1\text{H}$  NMR,  $^{13}\text{C}$  NMR, HRMS and IR spectrum of final compound **8f**

HPLC spectrum of **8f**

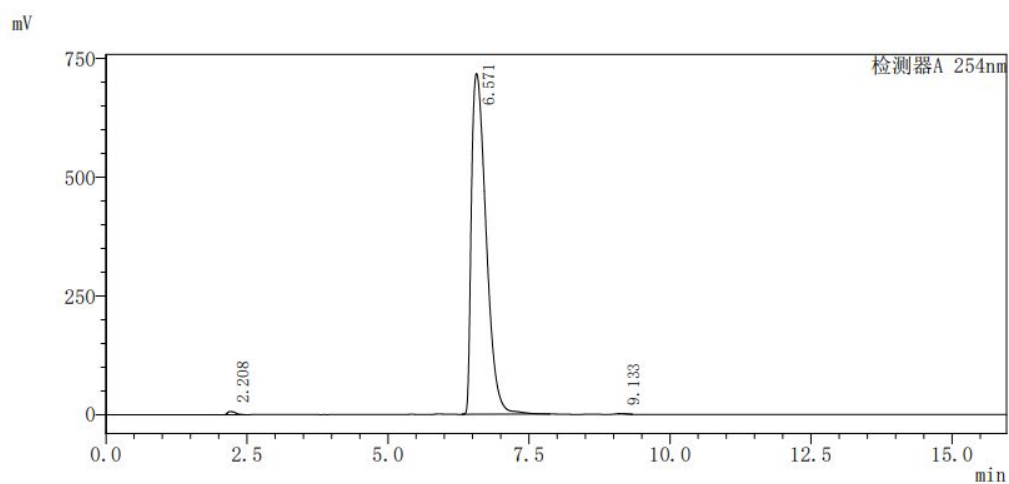

<峰表>

检测器A 254nm

| 峰号 | 保留时间  | 高度     | 面积       | 面积%    |
|----|-------|--------|----------|--------|
| 1  | 2.208 | 6521   | 61716    | 0.472  |
| 2  | 6.571 | 717558 | 13001028 | 99.486 |
| 3  | 9.133 | 618    | 5471     | 0.042  |

$^1\text{H}$  NMR (400 MHz,  $\text{CDCl}_3$ ) spectrum of **8f**

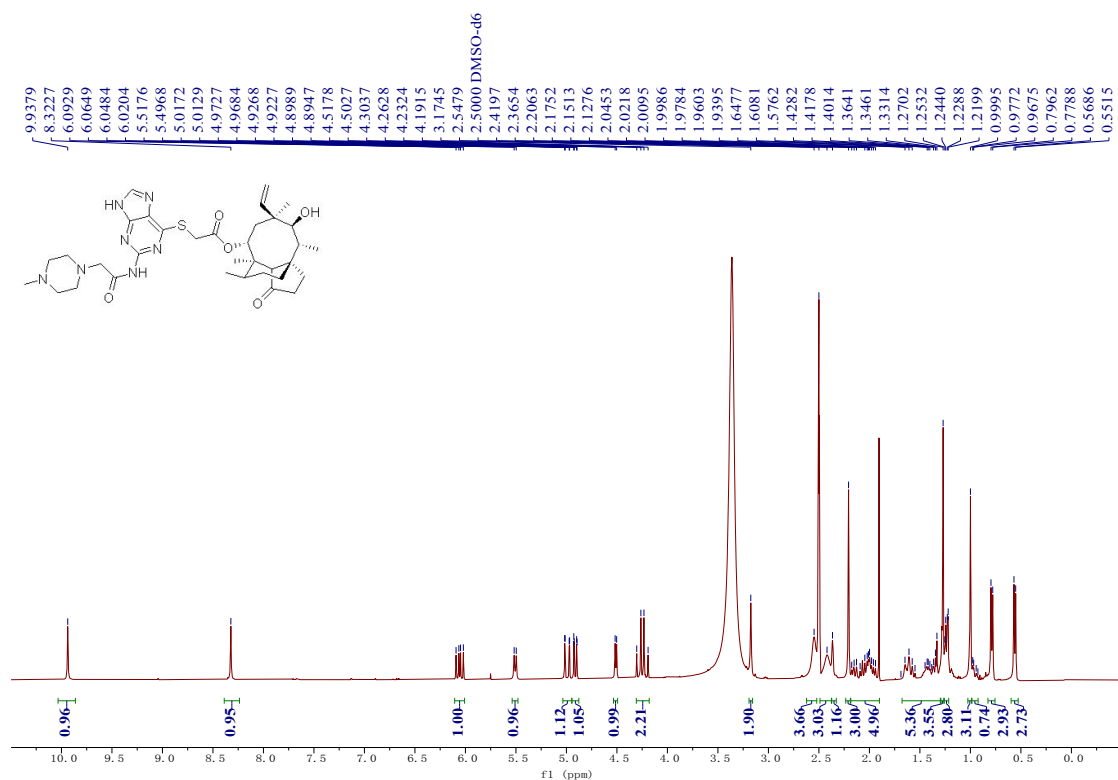

$^{13}\text{C}$  NMR (101 MHz,  $\text{DMSO}-d_6$ ) spectrum of **8f**

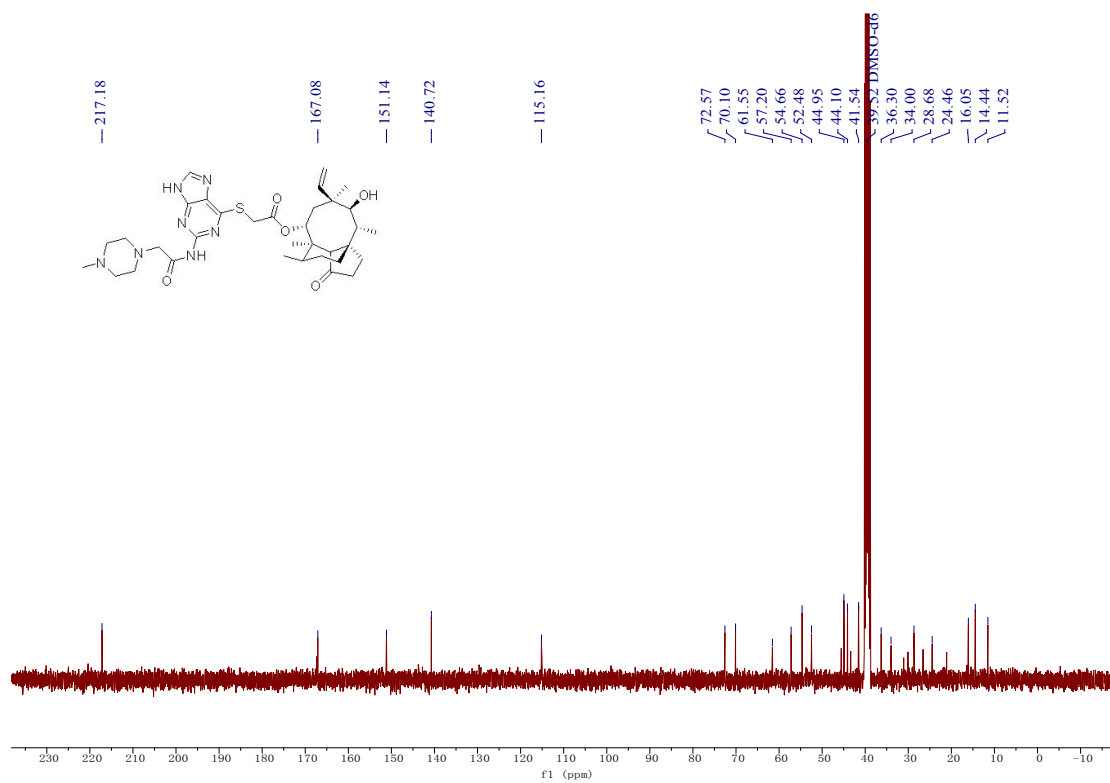

IR (KBr,  $\text{cm}^{-1}$ ) spectrum of **8f**

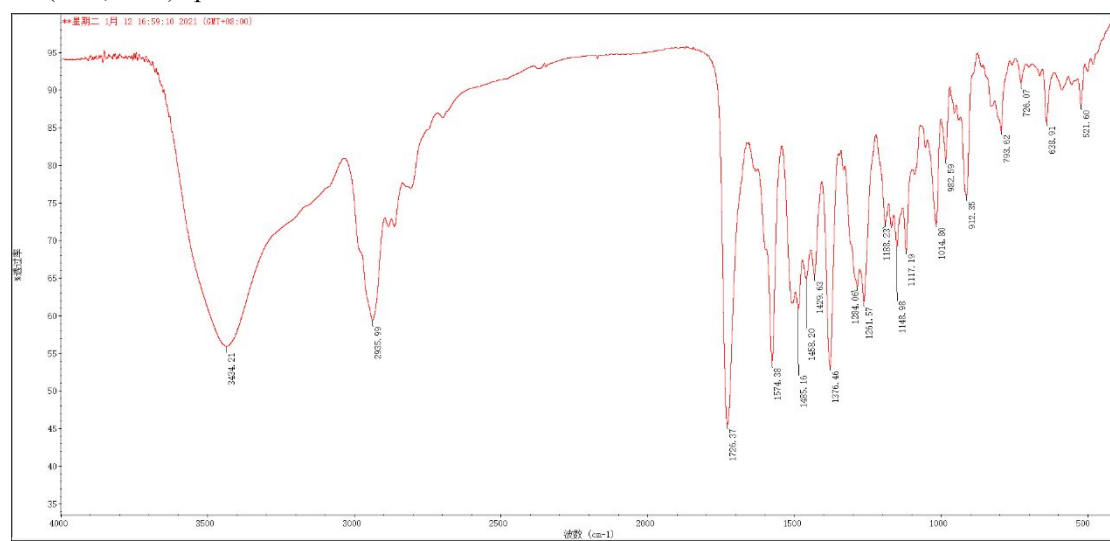

# HRMS spectrum of **8f**

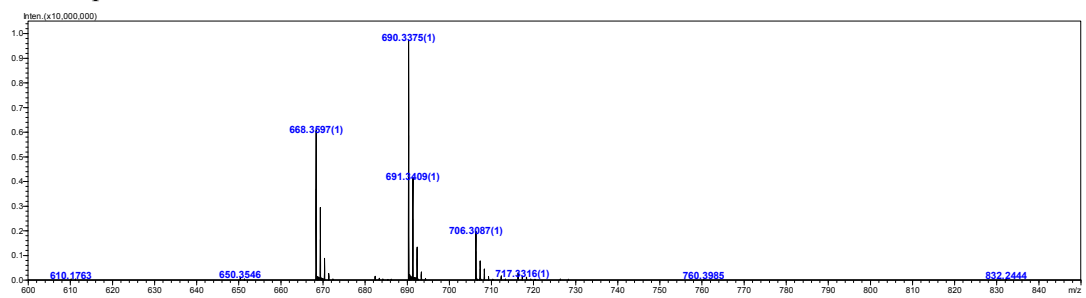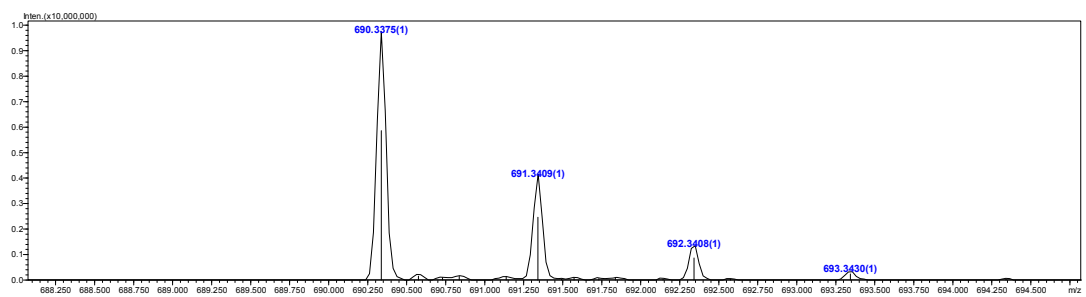

**Figure S31.** HPLC,  $^1\text{H}$  NMR,  $^{13}\text{C}$  NMR, HRMS and IR spectrum of final compound **8g**  
HPLC spectrum of **8g**

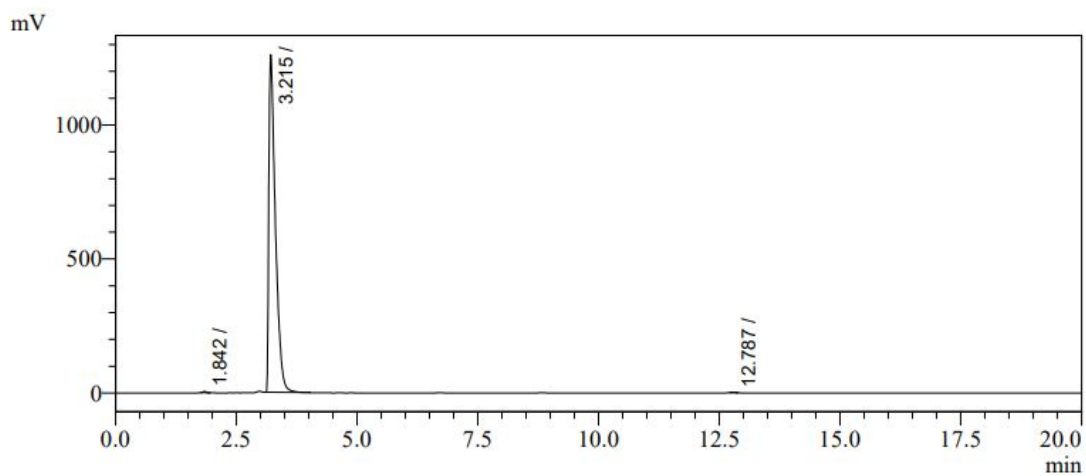

检测器A 254nm

| Peak# | Ret. Time | Height  | Area     | Area%  |
|-------|-----------|---------|----------|--------|
| 1     | 1.842     | 4570    | 17453    | 0.146  |
| 2     | 3.215     | 1259891 | 11939052 | 99.827 |
| 3     | 12.787    | 587     | 3178     | 0.027  |

$^1\text{H}$  NMR (400 MHz,  $\text{DMSO}-d_6$ ) spectrum of **8g**

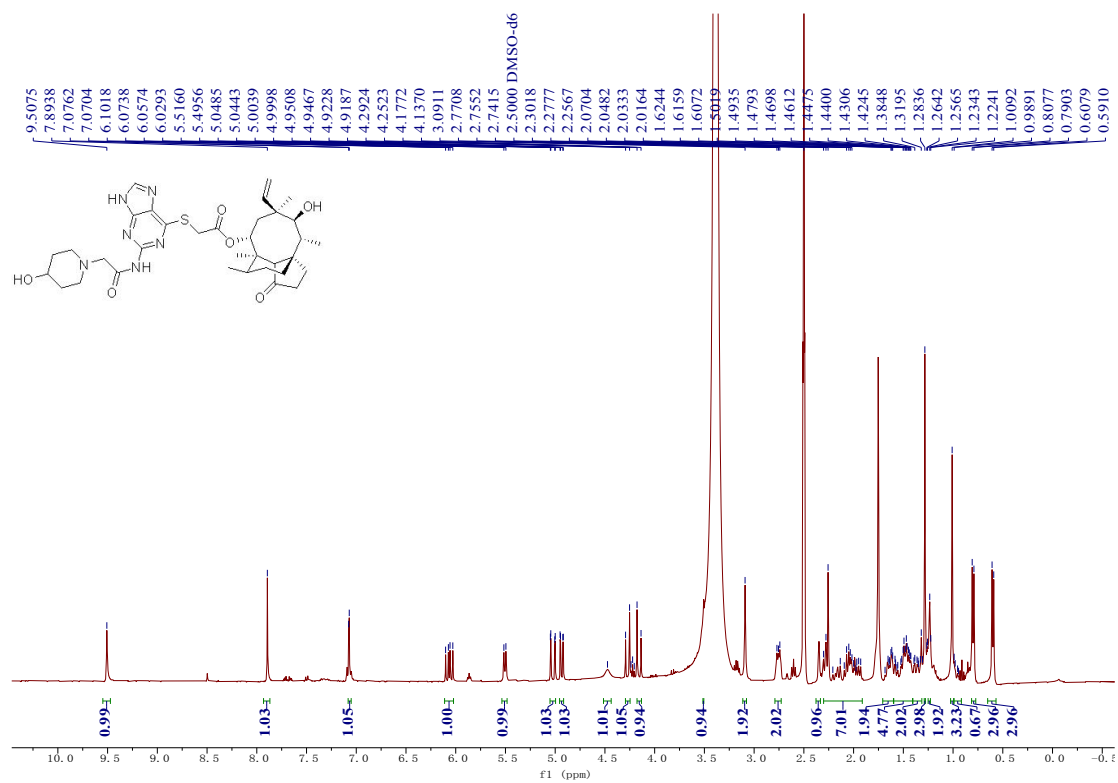



$^{13}\text{C}$  NMR (101 MHz,  $\text{DMSO-}d_6$ ) spectrum of **8g**

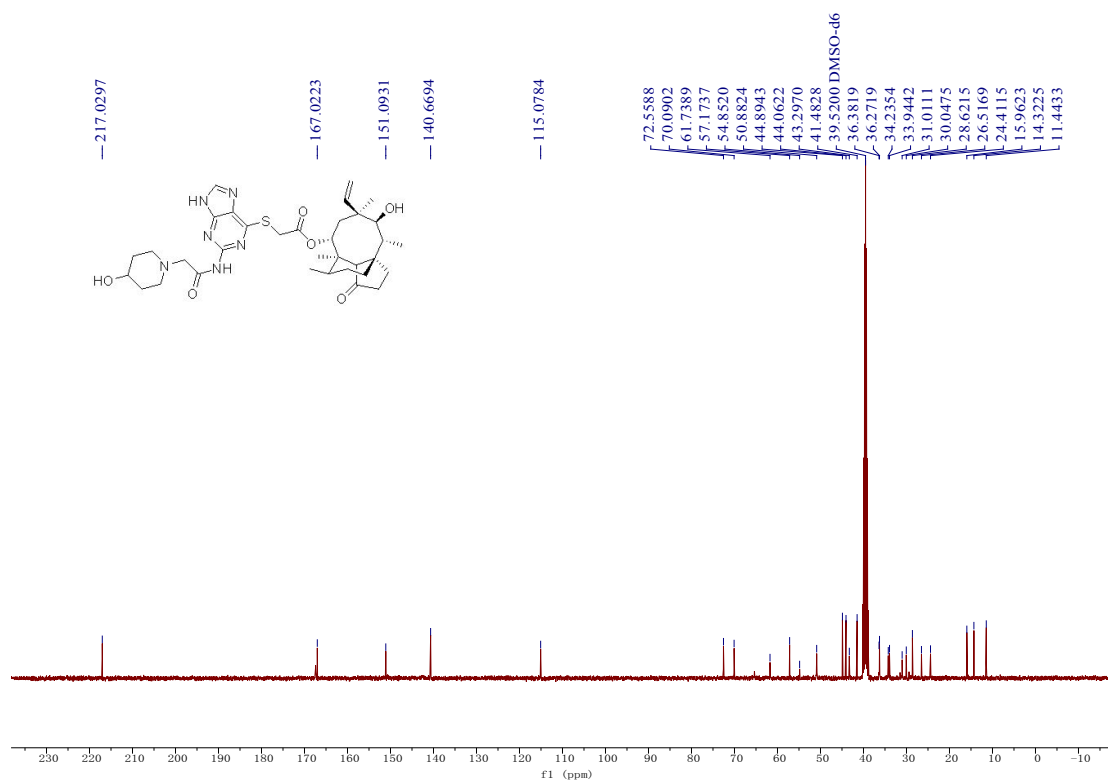

IR (KBr,  $\text{cm}^{-1}$ ) spectrum of **8g**

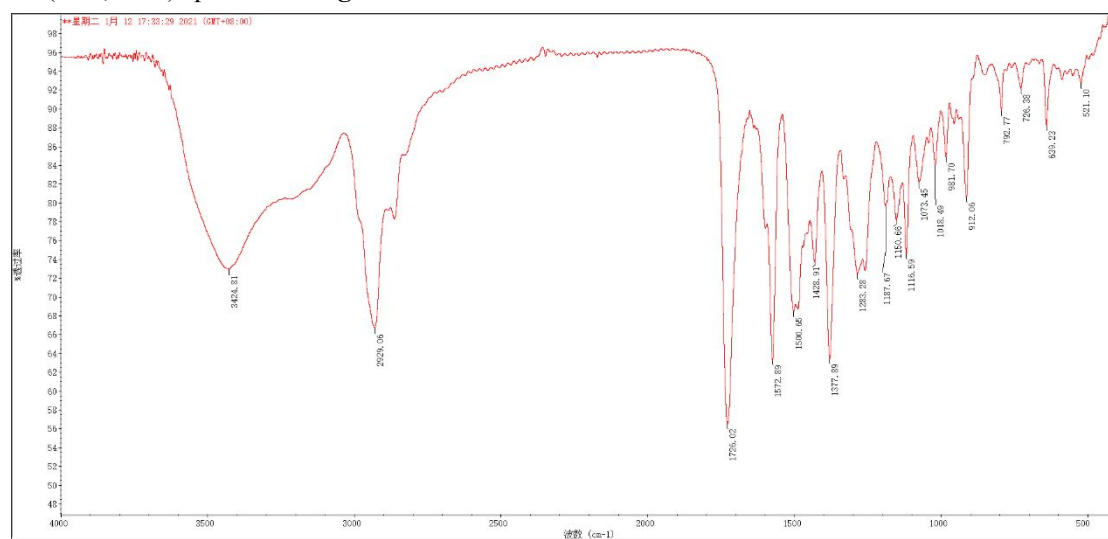

# HRMS spectrum of **8g**

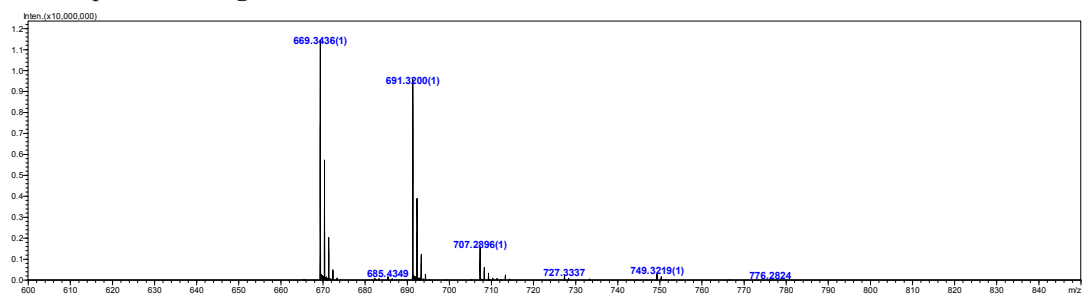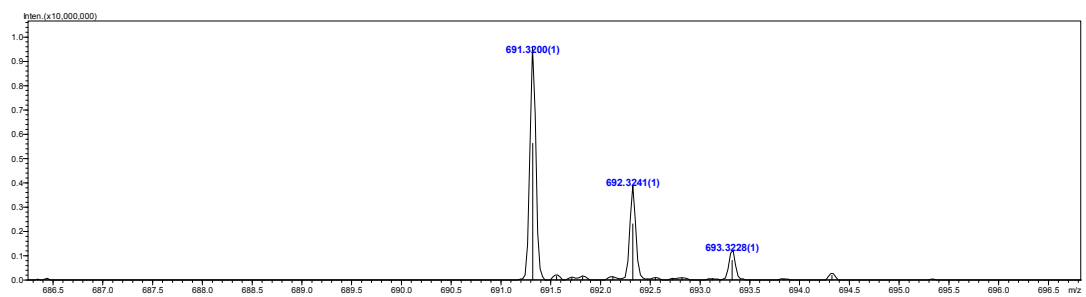

## 7. The crystal data of compound 6b and 6i

**Figure. S32** Crystal structure of compound **6b**

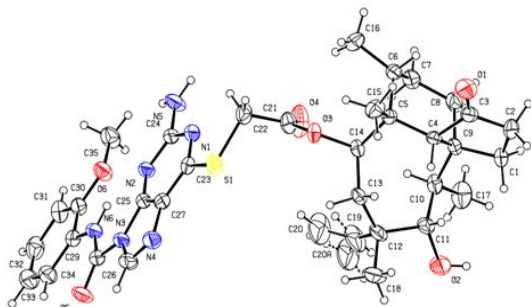

**Table S1.** the crystal data of compound **6b**

| Identification code                    | Compound <b>6b</b>                                              |
|----------------------------------------|-----------------------------------------------------------------|
| Empirical formula                      | C <sub>35</sub> H <sub>45</sub> N <sub>6</sub> O <sub>6</sub> S |
| Formula weight                         | 685.83                                                          |
| Temperature/K                          | 293.15                                                          |
| Crystal system                         | monoclinic                                                      |
| Space group                            | P2 <sub>1</sub>                                                 |
| a/Å                                    | 8.3074(4)                                                       |
| b/Å                                    | 48.604(2)                                                       |
| c/Å                                    | 9.4369(6)                                                       |
| $\alpha$ /°                            | 90                                                              |
| $\beta$ /°                             | 116.078(7)                                                      |
| $\gamma$ /°                            | 90                                                              |
| Volume/Å <sup>3</sup>                  | 3422.5(4)                                                       |
| Z                                      | 4                                                               |
| $\rho_{\text{calc}}/\text{cm}^3$       | 1.331                                                           |
| $\mu/\text{mm}^{-1}$                   | 0.151                                                           |
| F(000)                                 | 1460.0                                                          |
| Crystal size/mm <sup>3</sup>           | 0.35 × 0.3 × 0.25                                               |
| Radiation                              | MoK $\alpha$ ( $\lambda$ = 0.71073)                             |
| 2 $\theta$ range for data collection/° | 5.712 to 52.74                                                  |
| Index ranges                           | -10 ≤ h ≤ 10, -46 ≤ k ≤ 60, -10 ≤ l ≤ 11                        |
| Reflections collected                  | 14498                                                           |
| Independent reflections                | 10570 [R <sub>int</sub> = 0.0189, R <sub>sigma</sub> = 0.0369]  |
| Data/restraints/parameters             | 10570/1/905                                                     |
| Goodness-of-fit on F <sup>2</sup>      | 1.029                                                           |
| Final R indexes [I >= 2 $\sigma$ (I)]  | R <sub>1</sub> = 0.0411, wR <sub>2</sub> = 0.0930               |

|                                                |                                  |
|------------------------------------------------|----------------------------------|
| Final R indexes [all data]                     | $R_1 = 0.0504$ , $wR_2 = 0.1010$ |
| Largest diff. peak/hole / $e \text{ \AA}^{-3}$ | 0.20/-0.18                       |
| Flack parameter                                | 0.03(4)                          |
| CCDC                                           | 2210828                          |

---

**Figure. S33** Crystal structure of compound **6i**

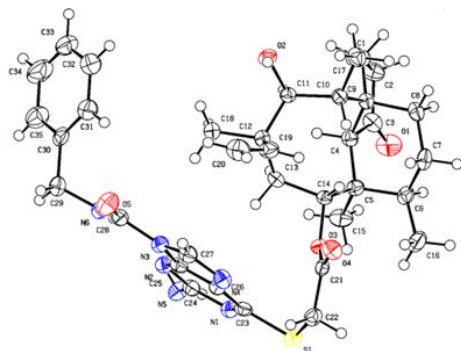

**Table S2.** the crystal data of compound **6i**

| Identification code                         | Compound <b>6i</b>                                              |
|---------------------------------------------|-----------------------------------------------------------------|
| Empirical formula                           | C <sub>35</sub> H <sub>44</sub> N <sub>6</sub> O <sub>5</sub> S |
| Formula weight                              | 660.82                                                          |
| Temperature/K                               | 150                                                             |
| Crystal system                              | orthorhombic                                                    |
| Space group                                 | P2 <sub>1</sub> 2 <sub>1</sub> 2 <sub>1</sub>                   |
| a/Å                                         | 9.9564(5)                                                       |
| b/Å                                         | 12.5757(8)                                                      |
| c/Å                                         | 26.1165(16)                                                     |
| $\alpha$ /°                                 | 90                                                              |
| $\beta$ /°                                  | 90                                                              |
| $\gamma$ /°                                 | 90                                                              |
| Volume/Å <sup>3</sup>                       | 3270.0(3)                                                       |
| Z                                           | 4                                                               |
| D <sub>x</sub> , g/cm <sup>3</sup>          | 1.342                                                           |
| $\mu$ /mm <sup>-1</sup>                     | 0.152                                                           |
| F(000)                                      | 1408.0                                                          |
| Crystal size/mm <sup>3</sup>                | 0.46 × 0.07 × 0.05                                              |
| Radiation                                   | MoK $\alpha$ ( $\lambda$ = 0.71073)                             |
| 2 $\theta$ range for data collection/°      | 4.378 to 50                                                     |
| Index ranges                                | -11 ≤ h ≤ 9, -14 ≤ k ≤ 14, -31 ≤ l ≤ 29                         |
| Reflections collected                       | 22481                                                           |
| Independent reflections                     | 5740 [R <sub>int</sub> = 0.1165, R <sub>sigma</sub> = 0.0987]   |
| Data/restraints/parameters                  | 5740/0/430                                                      |
| Goodness-of-fit on F <sup>2</sup>           | 1.023                                                           |
| Final R indexes [I ≥ 2 $\sigma$ (I)]        | R <sub>1</sub> = 0.0489, wR <sub>2</sub> = 0.1120               |
| Final R indexes [all data]                  | R <sub>1</sub> = 0.0590, wR <sub>2</sub> = 0.1199               |
| Largest diff. peak/hole / e Å <sup>-3</sup> | 0.26/-0.28                                                      |
| Flack parameter                             | 0.02(8)                                                         |
